# Supplementary material for: Influence of remote functional groups towards the formation of 1,2-cis glycosides: special emphasis on β-mannosylation
Source: Royal Society of Chemistry journal article supplement (doi:10.1039/c9ob00670b), 2019-01-01

## Supporting information

### Influence of remote functional groups towards the formation of 1,2-*cis* glycosides: Special emphasis to the $\beta$ -mannosylation

Arin Guchait and Anup Kumar Misra\*

#### Index

| Subject                                | Page  |
|----------------------------------------|-------|
| Spectral data of synthesized compounds | 2-12  |
| NMR spectra of synthesized compounds   | 13-70 |

### Spectral data of synthesized compounds:

**Compound 32:**  $^1\text{H}$  NMR (500 MHz,  $\text{CDCl}_3$ ):  $\delta$  7.24-6.76 (m, 23 H, Ar-H), 5.56 (br s, 1 H, PhCH), 5.49 (d,  $J = 3.5$  Hz, 1 H, H-1<sub>A</sub>), 5.45 (dd,  $J = 9.0$  Hz, 3.0 Hz, 1 H, H-3<sub>A</sub>), 4.87-4.80 (m, 3 H, 2 PhCH<sub>2</sub>, H-1<sub>B</sub>), 4.72 (d,  $J = 11.5$  Hz, 1 H, PhCH<sub>2</sub>), 4.60 (d,  $J = 11.5$  Hz, 1 H, PhCH<sub>2</sub>), 4.29-4.23 (m, 4 H, H-4<sub>A</sub>, H-4<sub>B</sub>, H-6<sub>aA</sub>, PhCH<sub>2</sub>), 4.18-4.15 (m, 1 H, H-5<sub>B</sub>), 4.08 (t,  $J = 9.0$  Hz, 1 H, H-3<sub>B</sub>), 3.84-3.82 (m, 2 H, H-2<sub>A</sub>, H-6<sub>bB</sub>), 3.77 (br s, 3 H, OMe), 3.76 (br s, 3 H, OMe), 3.72 (t,  $J = 9.0$  Hz, 1 H, H-6<sub>bA</sub>), 3.61-3.59 (m, 1 H, H-5<sub>A</sub>), 3.54-3.47 (m, 2 H, H-2<sub>B</sub>, H-6<sub>bB</sub>), 2.21 (s, 3 H, COCH<sub>3</sub>);  $^{13}\text{C}$  NMR (125 MHz,  $\text{CDCl}_3$ ):  $\delta$  170.0 (COCH<sub>3</sub>), 150.1-113.7 (Ar-C), 101.3 (PhCH), 99.9 (C-1<sub>B</sub>), 98.3 (C-1<sub>A</sub>), 82.7 (C-5<sub>A</sub>), 79.3 (C-2<sub>B</sub>), 78.3 (C-3<sub>B</sub>), 75.0 (C-4<sub>A</sub>), 74.9 (PhCH<sub>2</sub>), 74.3 (PhCH<sub>2</sub>), 72.9 (PhCH<sub>2</sub>), 69.9 (C-3<sub>A</sub>), 69.8 (C-4<sub>B</sub>), 69.1 (C-6<sub>A</sub>), 67.7 (C-6<sub>B</sub>), 63.2 (C-5<sub>B</sub>), 57.7 (C-2<sub>A</sub>), 55.4 (OMe), 55.1 (OMe), 21.1 (COCH<sub>3</sub>); ESI-MS: 926.3  $[\text{M}+\text{Na}]^+$ ; Anal. Calcd. for  $\text{C}_{50}\text{H}_{53}\text{N}_3\text{O}_{13}$  (903.98): C, 66.43; H, 5.91; found: C, 66.25; H, 6.05.

**Compound 33:**  $^1\text{H}$  NMR (500 MHz,  $\text{CDCl}_3$ ):  $\delta$  7.46-6.77 (m, 28 H, Ar-H), 5.82 (d,  $J = 4.0$  Hz, 1 H, H-1<sub>B</sub>), 5.51 (br s, 1 H, PhCH), 5.35 (d,  $J = 3.5$  Hz, 1 H, H-1<sub>A</sub>), 4.88-4.73 (m, 5 H, 5 PhCH), 4.47 (d,  $J = 11.0$  Hz, 2 H, 2 PhCH), 4.35 (d,  $J = 11.0$  Hz, 1 H, PhCH), 4.22-4.20 (m, 2 H, H-2<sub>A</sub>, H-6<sub>aB</sub>), 4.16-4.11 (m, 3 H, H-3<sub>A</sub>, H-4<sub>A</sub>, H-5<sub>A</sub>), 4.03 (t,  $J = 8.5$  Hz, 1 H, H-3<sub>B</sub>), 4.00-3.97 (m, 1 H, H-5<sub>B</sub>), 3.76 (br s, 3 H, OMe), 3.75 (br s, 3 H, OMe), 3.68 (t,  $J = 9.5$  Hz, 1 H, H-6<sub>bB</sub>), 3.54 (t,  $J = 9.5$  Hz, 1 H, H-4<sub>B</sub>), 3.47 (dd,  $J = 8.5$  Hz, 3.0 Hz, 1 H, H-2<sub>B</sub>), 1.41 (d,  $J = 3.5$  Hz, 3 H, CH<sub>3</sub>);  $^{13}\text{C}$  NMR (125 MHz,  $\text{CDCl}_3$ ):  $\delta$  159.4-113.6 (Ar-C), 101.1 (PhCH), 97.3 (C-1<sub>A</sub>), 97.2 (C-1<sub>B</sub>), 82.0 (C-4<sub>B</sub>), 79.5 (C-2<sub>B</sub>), 79.3 (C-3<sub>A</sub>), 77.9 (C-4<sub>A</sub>), 76.5 (C-5<sub>B</sub>), 75.0 (PhCH<sub>2</sub>), 74.4 (C-5<sub>A</sub>), 74.1 (PhCH<sub>2</sub>), 72.9 (PhCH<sub>2</sub>), 72.2 (PhCH<sub>2</sub>), 68.9 (PhCH<sub>2</sub>), 67.1 (C-2<sub>A</sub>), 63.0 (C-3<sub>B</sub>), 55.4 (OMe), 55.1 (OMe), 17.7 (CH<sub>3</sub>); ESI-MS: 933.3  $[\text{M}+\text{Na}]^+$ ; Anal. Calcd. for  $\text{C}_{55}\text{H}_{58}\text{O}_{12}$  (911.06): C, 72.51; H, 6.42; found: C, 72.40; H, 6.65.

**Compound 34:**  $^1\text{H}$  NMR (500 MHz,  $\text{CDCl}_3$ ):  $\delta$  7.47-6.77 (m, 33 H, Ar-H), 5.47 (d,  $J = 3.5$  Hz, 1 H, H-1<sub>A</sub>), 5.45 (br s, 1 H, PhCH), 5.25 (d,  $J = 3.5$  Hz, 1 H, H-1<sub>B</sub>), 5.19 (t,  $J = 9.5$  Hz, 1 H, H-4<sub>A</sub>), 4.84 (d,  $J = 11.5$  Hz, 1 H, PhCH), 4.70 (d,  $J = 12.0$  Hz, 1 H, PhCH), 4.64 (d,  $J = 11.5$  Hz, 1 H, PhCH), 4.58 (d,  $J = 11.5$  Hz, 1 H, PhCH), 4.36-4.31 (m, 2 H, H-3<sub>A</sub>, H-6<sub>aA</sub>), 4.17-4.09 (m, 3 H, H-2<sub>B</sub>, H-4<sub>B</sub>, H-6<sub>aB</sub>), 4.05-4.01 (m, 4 H, H-3<sub>B</sub>, H-5<sub>A</sub>, H-6<sub>bA</sub>, H-6<sub>bB</sub>), 3.93 (br s, 1 H, H-5<sub>B</sub>), 3.84 (OMe), 3.81 (OMe), 3.30 (dd,  $J = 10.0$  Hz, 3.5 Hz, 1 H, H-2<sub>A</sub>), 2.03 (s, 3 H, COCH<sub>3</sub>), 1.83 (s, 3 H, COCH<sub>3</sub>);  $^{13}\text{C}$  NMR (125 MHz,  $\text{CDCl}_3$ ):  $\delta$  170.2 (COCH<sub>3</sub>), 169.2 (COCH<sub>3</sub>), 155.6-113.7 (Ar-C), 100.8 (PhCH), 100.2 (C-1<sub>B</sub>), 97.9 (C-1<sub>A</sub>), 76.2 (C-3<sub>B</sub>), 74.8 (C-2<sub>B</sub>), 74.7 (C-4<sub>B</sub>), 74.4 (C-3<sub>A</sub>), 74.2 (PhCH<sub>2</sub>), 71.6 (PhCH<sub>2</sub>), 70.3 (C-4<sub>A</sub>), 69.6 (C-6<sub>A</sub>), 68.5 (C-5<sub>A</sub>), 63.7 (C-5<sub>B</sub>), 62.2 (C-2<sub>A</sub>), 62.0 (C-6<sub>B</sub>), 55.5 (OMe), 55.1 (OMe), 20.7 (COCH<sub>3</sub>); ESI-MS: 878.3  $[\text{M}+\text{Na}]^+$ ; Anal. Calcd. for  $\text{C}_{45}\text{H}_{49}\text{N}_3\text{O}_{14}$  (855.89): C, 63.15; H, 5.77; found: C, 63.00; H, 5.94.

**Compound 35:**  $^1\text{H}$  NMR (500 MHz,  $\text{CDCl}_3$ ):  $\delta$  7.47-6.77 (m, 33 H, Ar-H), 5.33 (br s, 1 H, PhCH), 5.08 (br s, 1 H, H-1<sub>B</sub>), 5.01 (d,  $J = 11.5$  Hz, 1 H, PhCH), 4.93 (d,  $J = 11.5$  Hz, 1 H, PhCH), 4.87 (d,  $J = 11.5$  Hz, 1 H, PhCH), 4.83 (d,  $J = 7.5$  Hz, 1 H, H-1<sub>A</sub>), 4.75 (d,  $J = 11.5$  Hz, 1 H, PhCH), 4.69 (br s, 2 H, 2 PhCH), 4.65 (d,  $J = 12.0$  Hz, 1 H, PhCH), 4.61 (d,  $J = 12.0$  Hz, 1

H, PhCH), 4.30 (d,  $J = 11.5$  Hz, H-1, PhCH), 4.16 (d,  $J = 12.0$  Hz, 1 H, PhCH), 4.14 (d,  $J = 3.0$  Hz, 1 H, H-2<sub>B</sub>), 4.11 (br s, 2 H, H-4<sub>B</sub>, H-5<sub>B</sub>), 4.06 (br s, 1 H, H-4<sub>A</sub>), 3.97 (t,  $J = 8.5$  Hz, 1 H, H-6<sub>aB</sub>), 3.96 (br s, 1 H, H-5<sub>A</sub>), 3.85 (dd,  $J = 10.0$  Hz, 3.5 Hz, 1 H, H-2<sub>A</sub>), 3.75 (s, 3 H, OMe), 3.73 (s, 3 H, OMe), 3.61-3.53 (m, 3 H, H-3<sub>B</sub>, H-6<sub>aA</sub>, H-6<sub>bB</sub>), 3.46-3.40 (m, 2 H, H-3<sub>A</sub>, H-6<sub>bA</sub>); <sup>13</sup>C NMR (125 MHz, CDCl<sub>3</sub>):  $\delta$  159.1-113.7 (Ar-C), 103.4 (C-1<sub>A</sub>), 100.8 (PhCH, C-1<sub>B</sub>), 80.7 (C-3<sub>A</sub>), 77.9 (C-2<sub>A</sub>), 75.7 (C-5<sub>B</sub>), 75.4 (C-4<sub>B</sub>), 74.9 (PhCH<sub>2</sub>), 74.7 (C-4<sub>A</sub>), 73.9 (PhCH<sub>2</sub>), 73.7 (C-2<sub>B</sub>, C-3<sub>B</sub>), 73.1 (PhCH<sub>2</sub>), 72.3 (PhCH<sub>2</sub>), 71.2 (PhCH<sub>2</sub>), 69.2 (C-6<sub>B</sub>), 67.5 (C-6<sub>A</sub>), 62.9 (C-5<sub>A</sub>), 55.5 (OMe), 55.0 (OMe); ESI-MS: 1039.4 [M+Na]<sup>+</sup>; Anal. Calcd. for C<sub>62</sub>H<sub>64</sub>O<sub>13</sub> (1017.16): C, 73.21; H, 6.34; found: C, 73.05; H, 6.50.

**Compound 36:** <sup>1</sup>H NMR (500 MHz, CDCl<sub>3</sub>):  $\delta$  7.50-7.24 (m, 17 H, Ar-H), 6.98 (d,  $J = 9.0$  Hz, 2 H, Ar-H), 6.84 (d,  $J = 9.0$  Hz, 2 H, Ar-H), 6.80 (d,  $J = 9.0$  Hz, 2 H, Ar-H), 5.81 (d,  $J = 2.5$  Hz, 1 H, H-1<sub>B</sub>), 5.41 (s, 1 H, PhCH), 5.30 (d,  $J = 3.5$  Hz, 1 H, H-1<sub>A</sub>), 4.92 (d,  $J = 11.0$  Hz, 1 H, PhCH), 4.87 (d,  $J = 11.0$  Hz, 1 H, PhCH), 4.79 (d,  $J = 11.0$  Hz, 1 H, PhCH), 4.72-4.61 (m, 3 H, 3 PhCH), 4.31 (dd,  $J = 10.0, 3.5$  Hz, 1 H, H-3<sub>B</sub>), 4.22 (dd,  $J = 12.0, 2.0$  Hz, 1 H, H-6<sub>aB</sub>), 4.19-4.11 (m, 3 H, H-4<sub>A</sub>, H-4<sub>B</sub>, H-5<sub>A</sub>), 4.03 (dd,  $J = 12.0, 2.0$  Hz, 1 H, H-6<sub>bB</sub>), 4.00-3.96 (m, 3 H, H-2<sub>A</sub>, H-2<sub>B</sub>, H-3<sub>A</sub>), 3.78 (s, 3 H, OCH<sub>3</sub>), 3.77 (s, 1 H, OCH<sub>3</sub>), 3.74 (br s, 1 H, H-5<sub>B</sub>), 1.12 (d,  $J = 6.5$  Hz, 3 H, CCH<sub>3</sub>); <sup>13</sup>C NMR (125 MHz, CDCl<sub>3</sub>):  $\delta$  159.3-113.7 (Ar-C), 100.8 (PhCH), 98.2 (C-1<sub>B</sub>), 97.6 (C-1<sub>A</sub>), 78.8 (C-2<sub>A</sub>), 75.6 (C-3<sub>B</sub>), 75.4 (C-3<sub>A</sub>), 74.0 (C-4<sub>A</sub>), 73.6 (PhCH<sub>2</sub>), 73.3 (PhCH<sub>2</sub>), 73.2 (C-4<sub>B</sub>), 71.2 (PhCH<sub>2</sub>), 69.4 (C-6<sub>B</sub>), 66.9 (C-5<sub>A</sub>), 63.1 (C-5<sub>B</sub>), 59.2 (C-2<sub>B</sub>), 55.5 (OCH<sub>3</sub>), 55.1 (OCH<sub>3</sub>), 17.6 (CCH<sub>3</sub>); ESI-MS: 868.3 [M+Na]<sup>+</sup>; Anal. Calcd. for C<sub>48</sub>H<sub>51</sub>N<sub>3</sub>O<sub>11</sub> (845.93): C, 68.15; H, 6.08; found: C, 68.00; H, 6.25.

**Compound 37 ( $\alpha/\beta = 1.5/1$ ):** <sup>1</sup>H NMR (500 MHz, CDCl<sub>3</sub>):  $\delta$  7.48-6.71 (m, 82 H, Ar-H), 5.58 (d,  $J = 3.5$  Hz, 1.5 H, H-1<sub>B $\alpha$</sub> ), 5.57 (s, 1 H, PhCH <sub>$\beta$</sub> ), 5.52 (br s, 1 H, H-1<sub>A $\beta$</sub> ), 5.46 (d,  $J = 1.5$  Hz, H-1<sub>A $\alpha$</sub> ), 5.45 (s, 1.5 H, PhCH <sub>$\alpha$</sub> ), 5.30-4.54 (m, 19 H, PhCH), 4.46-4.43 (m, 2 H, PhCH), 4.42 (d,  $J = 8.0$  Hz, 1 H, H-1<sub>B $\beta$</sub> ), 4.40-4.28 (m, 9 H), 4.25-4.08 (m, 6.5 H), 4.04-3.90 (m, 8.5 H), 3.88-3.84 (m, 2.5 H), 3.79 (s, 7.5 H, OCH<sub>3</sub>), 3.75 (s, 4 H, OCH<sub>3</sub>), 3.72 (s, 5 H, OCH<sub>3</sub>), 3.62-3.46 (m, 6 H), 3.40-3.35 (m, 1.5 H); <sup>13</sup>C NMR (125 MHz, CDCl<sub>3</sub>):  $\delta$  159.0-113.6 (Ar-C), 103.6 (C-1<sub>B $\beta$</sub> ), 101.4 (PhCH <sub>$\beta$</sub> ), 101.3 (PhCH <sub>$\alpha$</sub> ), 98.9 (C-1<sub>A $\alpha$</sub> ), 98.1 (C-1<sub>B $\alpha$</sub> ), 97.3 (C-1<sub>A $\beta$</sub> ), 82.1, 79.2, 79.1, 78.1, 77.9, 76.5, 76.4, 75.4, 75.3, 75.1, 74.7, 74.6 (2 C), 74.1, 73.9 (3 C), 73.6, 73.5, 73.3, 73.0, 72.8, 72.6, 71.5, 71.3, 70.2, 69.7, 68.8, 68.7, 68.6, 64.9, 64.7, 55.5 (2 C), 55.1 (2 C); ESI-MS: 1039.4 [M+Na]<sup>+</sup>; Anal. Calcd. for C<sub>62</sub>H<sub>64</sub>O<sub>13</sub> (1017.16): C, 73.21; H, 6.34; found: C, 73.04; H, 6.50.

**Compound 38:** <sup>1</sup>H NMR (500 MHz, CDCl<sub>3</sub>):  $\delta$  7.37-6.76 (m, 64 H, Ar-H), 5.85 (d,  $J = 3.5$  Hz, H-1<sub>A $\alpha$</sub> ), 5.34 (br s, 1.8 H, H-1<sub>B $\beta$</sub> , H-1<sub>B $\alpha$</sub> ), 5.08 (d,  $J = 11.0$  Hz, 1 H), 5.00 (d,  $J = 11.0$  Hz, 1 H), 4.97 (d,  $J = 11.0$  Hz, 0.8 H), 4.88-4.66 (m, 11 H), 4.60-4.56 (m, 2 H), 4.54 (d,  $J = 7.5$  Hz, 1 H), 4.50-4.40 (m, 4 H), 4.39-4.30 (m, 3.3 H), 4.23-4.07 (m, 5.9 H), 4.05-3.96 (m, 3.9 H), 3.77-3.75 (m, 11.8 H), 3.67-3.57 (m, 5.2 H), 3.52-3.44 (m, 4.8 H), 1.36-1.32 (m, 4.2 H); <sup>13</sup>C NMR (125 MHz, CDCl<sub>3</sub>):  $\delta$  154.9-113.7 (Ar-C), 104.1, 97.9, 97.2, 96.2, 84.7, 82.3, 81.2, 79.9, 79.5, 77.9, 77.6, 76.7, 76.5, 75.7, 75.4, 75.3, 74.9 (2 C), 74.8, 74.1, 74.0, 73.5, 73.4, 73.3, 72.9, 71.7, 70.8,

70.8, 69.7, 68.8, 67.3, 66.9, 55.5, 55.1, 17.9, 17.0; ESI-MS: 1025.4 [M+Na]<sup>+</sup>; Anal. Calcd. for C<sub>62</sub>H<sub>66</sub>O<sub>12</sub> (1002.45): C, 74.23; H, 6.63; found: C, 74.16; H, 6.80.

**Compound 39:** <sup>1</sup>H NMR (500 MHz, CDCl<sub>3</sub>): δ 7.47-6.80 (m, 29 H, Ar-H), 5.56 (s, 1 H, PhCH), 5.01 (d, *J* = 12.0 Hz, 1 H, PhCH), 4.89 (d, *J* = 12.0 Hz, 1 H, PhCH), 4.82 (d, *J* = 11.0 Hz, 1 H, PhCH), 4.79 (d, *J* = 11.0 Hz, 1 H, PhCH), 4.77 (d, *J* = 12.0 Hz, 1 H, PhCH), 4.76 (d, *J* = 12.0 Hz, 1 H, PhCH), 4.69 (d, *J* = 3.5 Hz, 1 H, H-1<sub>A</sub>), 4.66 (d, *J* = 12.0 Hz, 1 H, PhCH), 4.65 (d, *J* = 12.0 Hz, 1 H, PhCH), 4.55 (d, *J* = 12.0 Hz, 1 H, PhCH), 4.48 (d, *J* = 12.0 Hz, 1 H, PhCH), 4.23-4.20 (dd, *J* = 10.5 Hz, 5.5 Hz, 1 H, H-6<sub>aB</sub>), 4.15 (t, *J* = 9.5 Hz, 1 H, H-4<sub>B</sub>), 4.02-3.98 (m, 2 H, H-4<sub>A</sub>, H-6<sub>aA</sub>), 3.95 (br s, 1 H, H-1<sub>B</sub>), 3.87 (t, *J* = 9.5 Hz, 1 H, H-6<sub>bB</sub>), 3.77 (s, 3 H, OMe), 3.76-3.73 (m, 2 H, H-5<sub>A</sub>, OCH), 3.57 (d, *J* = 2.5 Hz, 1 H, H-2<sub>B</sub>), 3.49-3.35 (m, 7 H, H-2<sub>A</sub>, H-3<sub>A</sub>, H-3<sub>B</sub>, H-6<sub>bA</sub>, OCH, NCH<sub>2</sub>), 3.29-3.27 (m, 1 H, H-5<sub>B</sub>); <sup>13</sup>C NMR (125 MHz, CDCl<sub>3</sub>): δ 138.5-114.4 (Ar-C), 101.8 (*J*<sub>C1/H1</sub> = 156 Hz; C-1<sub>B</sub>), 101.4 (PhCH), 97.0 (C-1<sub>A</sub>), 81.8 (C-4<sub>A</sub>), 79.8 (C-4<sub>B</sub>), 78.7 (C-3<sub>B</sub>), 77.4 (C-2<sub>B</sub>), 76.9 (2 C, C-2<sub>A</sub>, C-3<sub>A</sub>), 75.6 (PhCH<sub>2</sub>), 74.5 (PhCH<sub>2</sub>), 74.3 (PhCH<sub>2</sub>), 73.1 (PhCH<sub>2</sub>), 72.2 (PhCH<sub>2</sub>), 69.9 (C-5<sub>A</sub>), 68.5 (C-6<sub>A</sub>), 67.9 (C-6<sub>B</sub>), 67.6 (C-5<sub>B</sub>), 66.5 (OCH<sub>2</sub>), 55.1 (OMe), 50.5 (NCH<sub>2</sub>); ESI-MS: 1002.4 [M+Na]<sup>+</sup>; Anal. Calcd. for C<sub>57</sub>H<sub>61</sub>N<sub>3</sub>O<sub>12</sub> (980.12): C, 69.85; H, 6.27; found: C, 69.70; H, 6.48.

**Compound 40:** <sup>1</sup>H NMR (500 MHz, CDCl<sub>3</sub>): δ 7.47-6.76 (m, 23 H, Ar-H), 5.57 (s, 1 H, PhCH), 5.48 (dd, *J* = 11 Hz, 2.5 Hz, 1 H, H-3<sub>A</sub>), 5.40 (d, *J* = 3.5 Hz, 1 H, H-1<sub>A</sub>), 4.88-4.87 (m, 2 H, 2 PhCH), 4.74 (d, *J* = 11.5 Hz, 1 H, PhCH), 4.61 (d, *J* = 12.0 Hz, 1 H, PhCH), 4.46 (br s, 2 H, 2 PhCH), 4.42 (br s, 1 H, H-1<sub>B</sub>), 4.27-4.25 (m, 1 H, H-5<sub>A</sub>), 4.24 (d, *J* = 2.5 Hz, 1 H, H-4<sub>A</sub>), 4.16 (t, *J* = 9.5 Hz, 1 H, H-4<sub>B</sub>), 4.05 (dd, *J* = 12.0 Hz, 4.5 Hz, 1 H, H-6<sub>aA</sub>), 3.89 (d, *J* = 3.0 Hz, 1 H, H-2<sub>B</sub>), 3.81-3.74 (m, 8 H, H-6<sub>bA</sub>, H-6<sub>aB</sub>, 2 OMe), 3.68 (dd, *J* = 12.0 Hz, 6.5 Hz, 1 H, H-6<sub>bB</sub>), 3.50 (dd, *J* = 9.0 Hz, 3.0 Hz, 1 H, H-3<sub>B</sub>), 3.38 (dd, *J* = 9.5 Hz, 3.0 Hz, 1 H, H-2<sub>A</sub>), 3.22-3.18 (m, 1 H, H-5<sub>B</sub>), 1.97 (s, 3 H, COCH<sub>3</sub>); <sup>13</sup>C NMR (125 MHz, CDCl<sub>3</sub>): δ 169.2 (COCH<sub>3</sub>), 159.3-113.7 (Ar-C), 102.5 (*J*<sub>C1/H1</sub> = 158 Hz; C-1<sub>B</sub>), 101.5 (PhCH), 98.5 (C-1<sub>A</sub>), 78.6 (C-4<sub>B</sub>), 77.4 (C-3<sub>B</sub>), 76.4 (C-2<sub>B</sub>), 74.8 (PhCH<sub>2</sub>), 74.3 (C-4<sub>A</sub>), 73.1 (PhCH<sub>2</sub>), 72.4 (PhCH<sub>2</sub>), 70.6 (C-3<sub>A</sub>), 69.9 (C-5<sub>A</sub>), 69.1 (C-6<sub>A</sub>), 68.3 (C-6<sub>B</sub>), 67.9 (C-5<sub>B</sub>), 57.7 (C-2<sub>A</sub>), 55.5 (OMe), 55.1 (OMe), 20.6 (COCH<sub>3</sub>); ESI-MS: 926.3 [M+Na]<sup>+</sup>; Anal. Calcd. for C<sub>50</sub>H<sub>53</sub>N<sub>3</sub>O<sub>13</sub> (903.98): C, 66.43; H, 5.91; found: C, 66.26; H, 6.07.

**Compound 41:** <sup>1</sup>H NMR (500 MHz, CDCl<sub>3</sub>): δ 7.49-7.47 (m, 2 H, Ar-H), 6.97 (d, *J* = 9.0 Hz, 2 H, Ar-H), 6.78 (d, *J* = 9.0 Hz, 4 H, Ar-H), 5.53 (s, 1 H, PhCH), 5.25 (d, *J* = 3.5 Hz, 1 H, H-1<sub>A</sub>), 5.04 (d, *J* = 11.0 Hz, 1 H, PhCH), 4.85 (d, *J* = 11.0 Hz, 1 H, PhCH), 4.82 (d, *J* = 11.0 Hz, 1 H, PhCH), 4.78 (d, *J* = 11.0 Hz, 1 H, PhCH), 4.56 (d, *J* = 11.0 Hz, 1 H, PhCH), 4.54 (br s, 1 H, H-1<sub>B</sub>), 4.51 (d, *J* = 11.0 Hz, 1 H, PhCH), 4.20 (t, *J* = 9.0 Hz each, 1 H, H-4<sub>B</sub>), 4.15 (dd, *J* = 12.0 Hz, 5.0 Hz, 1 H, H-6<sub>aB</sub>), 4.10-4.06 (m, 3 H, H-3<sub>A</sub>, H-4<sub>A</sub>, H-5<sub>A</sub>), 3.96 (d, *J* = 4.0 Hz, 1 H, H-2<sub>B</sub>), 3.94 (dd, *J* = 10.0 Hz, 3.5 Hz, 1 H, H-2<sub>B</sub>), 3.78 (s, 3 H, OMe), 3.76 (s, 3 H, OMe), 3.71 (t, *J* = 10.0 each, 1 H, H-6<sub>bB</sub>), 3.51 (dd, *J* = 10.0 Hz, 3.0 Hz, 1 H, H-3<sub>B</sub>), 3.29-3.22 (m, 1 H, H-5<sub>B</sub>), 1.17 (d, *J* = 6.5 Hz, 3 H, CCH<sub>3</sub>); <sup>13</sup>C NMR (125 MHz, CDCl<sub>3</sub>): δ 159.1-113.6 (Ar-C), 103.4 (C-1<sub>B</sub>), 101.3 (PhCH), 97.7 (C-1<sub>A</sub>), 78.7 (C-4<sub>B</sub>), 77.5 (C-3<sub>B</sub>), 77.3 (C-4<sub>A</sub>), 76.7 (C-3<sub>A</sub>), 75.9 (C-2<sub>A</sub>), 75.3



(C-2<sub>B</sub>), 74.7 (PhCH<sub>2</sub>), 73.7 (PhCH<sub>2</sub>), 71.9 (PhCH<sub>2</sub>), 71.4 (PhCH<sub>2</sub>), 68.4 (C-6<sub>B</sub>), 67.8 (C-5<sub>B</sub>), 66.6 (C-5<sub>A</sub>), 55.5 (OMe), 55.1 (OMe), 17.8 (CCH<sub>3</sub>); ESI-MS: 933.3 [M+Na]<sup>+</sup>; Anal. Calcd. for C<sub>55</sub>H<sub>58</sub>O<sub>12</sub> (911.04): C, 72.51; H, 6.42; found: C, 72.40; H, 6.56.

**Compound 42:** <sup>1</sup>H NMR (500 MHz, CDCl<sub>3</sub>): δ 7.48-6.79 (m, 18 H, Ar-H), 5.58 (s, 1 H, PhCH), 5.42 (d, *J* = 3.5 Hz, 1 H, H-1<sub>A</sub>), 5.08 (t, *J* = 9.0 Hz, 1 H, H-4<sub>A</sub>), 4.82 (d, *J* = 11.5 Hz, 1 H, PhCH), 4.71 (d, *J* = 11.5 Hz, 1 H, PhCH), 4.69 (br s, 1 H, H-1<sub>B</sub>), 4.65 (d, *J* = 12.0 Hz, 1 H, PhCH), 4.50 (d, *J* = 12.0 Hz, 1 H, PhCH), 4.35 (dd, *J* = 10.5 Hz, 5 Hz, 1 H, H-6<sub>aB</sub>), 4.24 (t, *J* = 10.0 Hz, 1 H, H-4<sub>B</sub>), 4.22-4.20 (m, 1 H, H-6<sub>aA</sub>), 4.14-4.06 (m, 3 H, H-3<sub>A</sub>, H-5<sub>A</sub>, H-6<sub>bA</sub>), 3.92 (d, *J* = 2.0 Hz, 1 H, H-2<sub>B</sub>), 3.83 (t, *J* = 10.5 Hz, 1 H, H-6<sub>bB</sub>), 3.78 (s, 3 H, OMe), 3.76 (s, 3 H, OMe), 3.58 (dd, *J* = 10.0 Hz, 3.5 Hz, 1 H, H-3<sub>A</sub>), 3.39-3.37 (m, 1 H, H-5<sub>B</sub>), 2.05 (s, 3 H, COCH<sub>3</sub>), 2.01 (s, 3 H, COCH<sub>3</sub>); <sup>13</sup>C NMR (125 MHz, CDCl<sub>3</sub>): δ 170.1 (COCH<sub>3</sub>), 169.2 (COCH<sub>3</sub>), 159.2-113.7 (Ar-C), 102.0 (*J*<sub>C1/H1</sub> = 158 Hz; C-1<sub>B</sub>), 101.5 (PhCH), 97.4 (C-1<sub>A</sub>), 78.5 (C-4<sub>B</sub>), 77.3 (C-3<sub>B</sub>), 76.6 (C-2<sub>B</sub>), 76.3 (C-3<sub>A</sub>), 75.0 (PhCH<sub>2</sub>), 72.0 (PhCH<sub>2</sub>), 68.7 (C-2<sub>A</sub>), 68.6 (C-6<sub>A</sub>), 68.1 (C-4<sub>A</sub>), 67.7 (C-5<sub>A</sub>), 63.3 (C-5<sub>B</sub>), 62.0 (C-6<sub>B</sub>), 55.5 (OMe), 55.1 (OMe), 20.8 (COCH<sub>3</sub>), 20.7 (COCH<sub>3</sub>); ESI-MS: 878.3 [M+Na]<sup>+</sup>; Anal. Calcd. for C<sub>45</sub>H<sub>49</sub>N<sub>3</sub>O<sub>14</sub> (855.89): C, 63.15; H, 5.77; found: C, 63.00; H, 5.90.

**Compound 43:** <sup>1</sup>H NMR (500 MHz, CDCl<sub>3</sub>): δ 7.52-6.78 (m, 33 H, Ar-H), 5.57 (s, 1 H, PhCH), 5.00 (d, *J* = 12.0 Hz, 1 H, PhCH), 4.92 (d, *J* = 11.5 Hz, 1 H, PhCH), 4.87 (d, *J* = 11.5 Hz, 1 H, PhCH), 4.80 (d, *J* = 7.5 Hz, 1 H, H-1<sub>A</sub>), 4.78-4.74 (m, 4 H, 4 PhCH), 4.61-4.54 (m, 2 H, 2 PhCH), 4.51-4.48 (m, 2 H, PhCH, H-1<sub>B</sub>), 4.16-4.13 (m, 3 H, H-4<sub>A</sub>, H-6<sub>aA</sub>, H-6<sub>aB</sub>), 3.97 (d, *J* = 3.5 Hz, 1 H, H-2<sub>B</sub>), 3.90 (dd, *J* = 8.5 Hz, 2.5 Hz, 1 H, H-2<sub>A</sub>), 3.86-3.80 (m, 2 H, H-4<sub>B</sub>, H-6<sub>bB</sub>), 3.79 (s, 3 H, OMe), 3.78 (s, 3 H, OMe), 3.73-3.70 (m, 1 H, H-6<sub>bA</sub>), 3.66-3.64 (m, 1 H, H-5<sub>A</sub>), 3.56 (dd, *J* = 9.5 Hz, 3.0 Hz, 1 H, H-3<sub>A</sub>), 3.40 (dd, *J* = 10.0 Hz, 3.0 Hz, 1 H, H-3<sub>B</sub>), 3.19-3.14 (m, 1 H, H-5<sub>B</sub>); <sup>13</sup>C NMR (125 MHz, CDCl<sub>3</sub>): δ 159.1-113.7 (Ar-C), 103.1 (*J*<sub>C1/H1</sub> = 158 Hz; C-1<sub>B</sub>), 102.2 (PhCH), 101.3 (C-1<sub>A</sub>), 81.7 (C-3<sub>A</sub>), 79.1 (C-2<sub>A</sub>), 78.5 (C-4<sub>B</sub>), 78.1 (C-3<sub>B</sub>), 75.5 (C-2<sub>B</sub>), 75.2 (PhCH<sub>2</sub>), 74.6 (PhCH<sub>2</sub>), 73.9 (C-4<sub>A</sub>), 73.6 (PhCH<sub>2</sub>), 73.5 (PhCH<sub>2</sub>), 72.8 (C-5<sub>A</sub>), 72.0 (PhCH<sub>2</sub>), 69.4 (C-6<sub>A</sub>), 68.5 (C-6<sub>B</sub>), 67.7 (C-5<sub>B</sub>), 55.5 (OMe), 55.1 (OMe); ESI-MS: 1039.4 [M+Na]<sup>+</sup>; Anal. Calcd. for C<sub>62</sub>H<sub>64</sub>O<sub>13</sub> (1017.18): C, 73.21; H, 6.34; found: C, 73.10; H, 6.50.

**Compound 44:** <sup>1</sup>H NMR (500 MHz, CDCl<sub>3</sub>): δ 7.47-6.80 (m, 23 H, Ar-H), 5.54 (s, 1 H, PhCH), 5.44 (d, *J* = 3.5 Hz, 1 H, H-1<sub>A</sub>), 5.41-5.36 (m, 2 H, NH, H-3<sub>A</sub>), 4.76 (d, *J* = 12.0 Hz, 1 H, PhCH), 4.70-4.61 (m, 4 H, 4 PhCH), 4.60-4.58 (m, 1 H, H-6<sub>aA</sub>), 4.50 (d, *J* = 12.0 Hz, 1 H, PhCH), 4.31 (brs, 1 H, H-1<sub>B</sub>), 4.29-4.25 (m, 2 H, H-6<sub>bA</sub>, H-6<sub>aB</sub>), 4.11-4.07 (m, 1 H, H-2<sub>A</sub>), 4.04 (t, *J* = 9.5 Hz, 1 H, H-4<sub>B</sub>), 3.99 (t, *J* = 9.0 Hz, 1 H, H-4<sub>A</sub>), 3.80-3.76 (m, 8 H, H-5<sub>A</sub>, H-6<sub>bB</sub>, 2 OMe), 3.52 (d, *J* = 2.5 Hz, 1 H, H-2<sub>B</sub>), 3.49-3.42 (m, 2 H, CH<sub>2</sub>CCl<sub>3</sub>), 3.13-3.11 (m, 1 H, H-5<sub>B</sub>), 2.05 (s, 3 H, COCH<sub>3</sub>); <sup>13</sup>C NMR (125 MHz, CDCl<sub>3</sub>): δ 170.7 (COCH<sub>3</sub>), 159.1 (COCH<sub>2</sub>CCl<sub>3</sub>), 155.4-113.7 (Ar-C), 101.6 (PhCH), 101.4 (*J*<sub>C1/H1</sub> = 156 Hz; C-1<sub>B</sub>), 96.8 (C-1<sub>A</sub>), 78.7 (C-4<sub>B</sub>), 77.7 (C-3<sub>B</sub>), 76.6 (C-2<sub>B</sub>), 75.2 (C-4<sub>A</sub>), 74.7 (PhCH<sub>2</sub>), 74.5 (PhCH<sub>2</sub>), 73.6 (PhCH<sub>2</sub>), 72.2 (C-6<sub>A</sub>), 71.1 (C-3<sub>A</sub>), 70.6 (C-5<sub>A</sub>), 68.6 (CH<sub>2</sub>CCl<sub>3</sub>), 67.9 (C-6<sub>B</sub>), 67.4 (C-5<sub>B</sub>), 55.5 (OMe), 55.1 (OMe), 54.3 (C-2<sub>A</sub>), 20.9

(COCH<sub>3</sub>); ESI-MS: 1074.2 [M+Na]<sup>+</sup>; Anal. Calcd. for C<sub>53</sub>H<sub>56</sub>Cl<sub>3</sub>NO<sub>15</sub> (1053.37): C, 60.43; H, 5.36; found: C, 60.28; H, 5.50.

**Compound 45:** <sup>1</sup>H NMR (500 MHz, CDCl<sub>3</sub>): δ 7.53-6.80 (m, 28 H, Ar-H), 5.57 (s, 1 H, PhCH), 5.52 (br s, 1 H, H-1<sub>A</sub>), 5.02 (d, *J* = 12.0 Hz, 1 H, PhCH), 4.92-4.89 (m, 2 H, PhCH<sub>2</sub>), 4.84 (d, *J* = 11.5 Hz, 1 H, PhCH), 4.66 (d, *J* = 12.0 Hz, 2 H, PhCH<sub>2</sub>), 4.56 (d, *J* = 12.0 Hz, 1 H, PhCH), 4.54 (brs, 1 H, H-1<sub>B</sub>), 4.50 (d, *J* = 12.0 Hz, 1 H, PhCH), 4.24 (dd, *J* = 10.5 Hz, 5.0 Hz, 1 H, H-6<sub>ab</sub>), 4.17-4.08 (m, 3 H, H-2<sub>B</sub>, H-3<sub>A</sub>, H-4<sub>B</sub>), 4.00 (d, *J* = 1.5 Hz, 1 H, H-2<sub>A</sub>), 3.91-3.81 (m, 2 H, H-5<sub>A</sub>, H-6<sub>bb</sub>), 3.79 (s, 3 H, OMe), 3.76 (s, 3 H, OMe), 3.55 (t, *J* = 9.5 Hz, 1 H, H-4<sub>A</sub>), 3.43 (dd, *J* = 10.0 Hz, 3.0 Hz, 1 H, H-3<sub>B</sub>), 3.21-3.15 (m, 1 H, H-5<sub>B</sub>); <sup>13</sup>C NMR (125 MHz, CDCl<sub>3</sub>): δ 159.2-113.7 (Ar-C), 103.3 (*J*<sub>C1/H1</sub> = 156.5 Hz; C-1<sub>B</sub>), 101.3 (PhCH), 97.8 (C-1<sub>A</sub>), 80.5 (C-4<sub>B</sub>), 80.1 (C-3<sub>B</sub>), 78.3 (C-2<sub>B</sub>), 77.5 (C-4<sub>A</sub>), 77.2 (C-3<sub>A</sub>), 75.9 (C-2<sub>A</sub>), 75.6 (PhCH<sub>2</sub>), 75.4 (PhCH<sub>2</sub>), 72.9 (PhCH<sub>2</sub>), 71.9 (PhCH<sub>2</sub>), 68.5 (C-6<sub>B</sub>), 68.4 (C-5<sub>A</sub>), 67.7 (C-5<sub>B</sub>), 55.6 (OMe), 55.3 (OMe), 18.2 (Me); ESI-MS: 933.3 [M+Na]<sup>+</sup>; Anal. Calcd. for C<sub>55</sub>H<sub>58</sub>O<sub>12</sub> (911.06): C, 72.51; H, 6.42; found: C, 72.40; H, 6.65.

**Compound 46:** <sup>1</sup>H NMR (500 MHz CDCl<sub>3</sub>): δ 8.01-6.76 (m, 38 H, Ar-H), 5.53 (s, 1 H, PhCH), 5.31 (t, *J* = 9.5 Hz, 1 H, H-2<sub>B</sub>), 4.96-4.90 (m, 3 H, H-3<sub>B</sub>, 2 PhCH), 4.84 (d, *J* = 7.0 Hz, 1 H, H-1<sub>A</sub>), 4.77-4.66 (m, 5 H, 5 PhCH), 4.65 (d, *J* = 7.5 Hz, 1 H, H-2<sub>B</sub>), 4.64 (dd, *J* = 10.0 Hz, 6.0 Hz, 1 H, H-6<sub>aA</sub>), 4.49-4.44 (m, 2 H, 2 PhCH), 4.42 (br s, 1 H, H-1<sub>C</sub>), 4.40 (d, *J* = 12.0 Hz, 1 H, PhCH), 4.28 (dd, *J* = 11.0 Hz, 5.5 Hz, 1 H, H-6<sub>bA</sub>), 4.14 (d, *J* = 2.5 Hz, 1 H, H-4<sub>B</sub>), 4.09 (t, *J* = 9.5 Hz, 1 H, H-4<sub>C</sub>), 4.00 (t, *J* = 9.0 Hz, 1 H, H-4<sub>A</sub>), 3.94 (d, *J* = 2.5 Hz, 1 H, H-2<sub>C</sub>), 3.85 (dd, *J* = 10.0 Hz, 5.5 Hz, 1 H, H-6<sub>aC</sub>), 3.78- 3.77 (m, 5 H, H-6<sub>abB</sub>, OMe), 3.76-3.62 (m, 3 H, H-2<sub>A</sub>, H-3<sub>A</sub>, H-6<sub>bC</sub>), 3.60 (m, 1 H, H-5<sub>A</sub>), 3.38 (dd, *J* = 10.0 Hz, 3.0 Hz, 1 H, H-3<sub>C</sub>), 3.01 (m, 1 H, H-5<sub>C</sub>), 2.05 (s, 3 H, COCH<sub>3</sub>), 1.93 (s, 3 H, COCH<sub>3</sub>), 20.7 (2 C, 2 COCH<sub>3</sub>); <sup>13</sup>C NMR (125MHz, CDCl<sub>3</sub>): δ 169.8 (COCH<sub>3</sub>), 169.2 (COCH<sub>3</sub>), 165.7 (COPh), 155.3-113.6 (Ar-C), 103.0 (*J*<sub>C1/H1</sub> = 158 Hz; C-1<sub>C</sub>), 102.6 (C-1<sub>A</sub>), 101.3 (PhCH), 100.5 (C-1<sub>B</sub>), 82.5 (C-3<sub>A</sub>), 81.6 (C-2<sub>A</sub>), 78.0 (C-4<sub>C</sub>), 77.4 (C-3<sub>C</sub>), 76.9 (C-4<sub>A</sub>), 75.1 (C-5<sub>A</sub>), 75.0 (2 C, C-4<sub>B</sub>, C-2<sub>C</sub>), 74.5 (C-3<sub>B</sub>), 74.3 (PhCH<sub>2</sub>), 73.6 (PhCH<sub>2</sub>), 73.4 (PhCH<sub>2</sub>), 73.3 (PhCH<sub>2</sub>), 72.0 (PhCH<sub>2</sub>), 71.6 (C-5<sub>B</sub>), 70.2 (C-2<sub>B</sub>), 68.2 (C-6<sub>B</sub>), 67.9 (C-6<sub>C</sub>), 67.8 (C-5<sub>C</sub>), 62.6 (C-6<sub>A</sub>), 55.6 (OMe), 55.2 (OMe); ESI-MS: 1341.5 [M+Na]<sup>+</sup>; Anal. Calcd. for C<sub>74</sub>H<sub>78</sub>O<sub>22</sub> (1319.42): C, 67.36; H, 5.96; found: C, 67.20; H, 6.10.

**Compound 47:** <sup>1</sup>H NMR (500 MHz CDCl<sub>3</sub>): δ 7.50-6.81 (m, 38 H, Ar-H), 5.63 (s, 1 H, PhCH), 5.52 (s, 1 H, PhCH), 5.42 (s, 1 H, PhCH), 5.35 (br s, 1 H, H-1<sub>A</sub>), 5.12 (br s, 1 H, H-1<sub>B</sub>), 4.96 (d, *J* = 12.0 Hz, 1 H, PhCH), 4.89 (d, *J* = 11.5 Hz, 2 H, 2 PhCH), 4.83 (d, *J* = 12.0 Hz, 1 H, PhCH), 4.76 (d, *J* = 12.0 Hz, 1 H, PhCH), 4.62 (d, *J* = 12.0 Hz, 1 H, PhCH), 4.58 (d, *J* = 12.0 Hz, 1 H, PhCH), 4.52 (d, *J* = 11.5 Hz, 1 H, PhCH), 4.24-4.13 (m, 6 H, H-2<sub>A</sub>, H-2<sub>B</sub>, H-4<sub>C</sub>, H-6<sub>aA</sub>, H-6<sub>aB</sub>, H-6<sub>aC</sub>), 4.12-4.04 (m, 2 H, H-4<sub>A</sub>, H-4<sub>B</sub>), 4.05 (br s, 1 H, H-1<sub>C</sub>), 4.02-3.98 (m, 2 H, H-2<sub>C</sub>, H-3<sub>B</sub>), 3.91-3.84 (m, 2 H, H-5<sub>A</sub>, H-5<sub>B</sub>), 3.79 (s, 3 H, OMe), 3.77 (s, 3 H, OMe), 3.75-3.70 (m, 4 H, H-3<sub>A</sub>, H-6<sub>bA</sub>, H-6<sub>bB</sub>, H-6<sub>bC</sub>), 3.24 (dd, *J* = 10.0 Hz, 3.0 Hz, 1 H, H-3<sub>C</sub>), 2.98-2.93 (m, 1 H, H-5<sub>C</sub>); <sup>13</sup>C NMR (125 MHz, CDCl<sub>3</sub>): δ 159.0-113.7 (Ar-C), 101.4 (2 C, 2 PhCH), 101.3 (PhCH), 100.5 (2 C, C-1<sub>B</sub>, C-1<sub>C</sub> (*J*<sub>C1/H1</sub> = 158 Hz)), 98.6 (C-1<sub>A</sub>), 79.5 (C-3<sub>B</sub>), 78.7 (C-4<sub>A</sub>), 77.1 (C-3<sub>C</sub>), 76.8 (C-

3<sub>A</sub>), 76.5 (C-2<sub>A</sub>), 76.3 (C-2<sub>B</sub>), 75.4 (C-4<sub>C</sub>), 74.6 (PhCH<sub>2</sub>), 74.4 (PhCH<sub>2</sub>), 73.5 (C-2<sub>C</sub>), 71.7 (PhCH<sub>2</sub>), 71.6 (PhCH<sub>2</sub>), 68.8 (C-6<sub>C</sub>), 68.6 (C-6<sub>B</sub>), 68.5 (C-6<sub>A</sub>), 67.0 (C-5<sub>C</sub>), 64.9 (C-5<sub>B</sub>), 64.3 (C-5<sub>A</sub>), 55.5 (OMe), 55.1 (OMe); ESI-MS: 1287.5 [M+Na]<sup>+</sup>; Anal. Calcd. for C<sub>75</sub>H<sub>76</sub>O<sub>18</sub> (1265.42): C, 71.19; H, 6.05; found: C, 71.00; H, 6.15.

**Compound 48:** <sup>1</sup>H NMR (500 MHz CDCl<sub>3</sub>): δ 7.49-6.84 (m, 34 H, Ar-H), 5.49 (s, 1 H, PhCH), 5.43 (s, 1 H, PhCH), 5.42 (s, 1 H, PhCH), 5.19 (br s, 1 H, H-1<sub>B</sub>), 4.93 (d, *J* = 12.0 Hz, 1 H, PhCH), 4.83 (d, *J* = 12.0 Hz, 1 H, PhCH), 4.82 (d, *J* = 12.0 Hz, 1 H, PhCH), 4.74 (d, *J* = 12.0 Hz, 1 H, PhCH), 4.70 (d, *J* = 12.0 Hz, 1 H, PhCH), 4.63 (d, *J* = 12.0 Hz, 1 H, PhCH), 4.55 (d, *J* = 7.5 Hz, 1 H, H-1<sub>A</sub>), 4.47 (br s, 2 H, 2 PhCH), 4.29 (dd, *J* = 10.0 Hz, 3.5 Hz, 1 H, H-6<sub>ab</sub>), 4.19 (br s, 1 H, H-2<sub>B</sub>), 4.17-4.07 (m, 4 H, H-5<sub>B</sub>, H-6<sub>aA</sub>, H-6<sub>aC</sub>, OCH), 4.06 (br s, 1 H, H-1<sub>C</sub>), 4.05-3.86 (m, 3 H, H-3<sub>A</sub>, H-3<sub>B</sub>, H-4<sub>B</sub>), 3.80 (s, 3 H, OMe), 3.78-3.68 (m, 5 H, H-2<sub>C</sub>, OCH, H-6<sub>bA</sub>, H-6<sub>bB</sub>, H-6<sub>bC</sub>), 3.61-3.58 (m, 2 H, H-4<sub>A</sub>, H-4<sub>C</sub>), 3.47-3.45 (m, 2 H, NCH<sub>2</sub>), 3.44-3.36 (m, 1 H, H-5<sub>A</sub>), 3.35 (t, *J* = 9.5 Hz, 1 H, H-2<sub>A</sub>), 2.90 (dd, *J* = 10.0 Hz, 2.5 Hz, 1 H, H-3<sub>C</sub>), 2.45-2.35 (m, 1 H, H-5<sub>C</sub>); <sup>13</sup>C NMR (125 MHz, CDCl<sub>3</sub>): δ 159.0-113.7 (Ar-C), 104.5 (C-1<sub>B</sub>), 102.3 (PhCH), 101.5 (PhCH), 101.3 (PhCH), 99.8 (*J*<sub>C1/H1</sub> = 158 Hz; C-1<sub>C</sub>), 98.2 (C-1<sub>A</sub>), 81.8 (C-4<sub>A</sub>), 79.2 (C-4<sub>C</sub>), 78.5 (C-2<sub>C</sub>), 78.1 (C-2<sub>A</sub>), 76.8 (C-3<sub>A</sub>), 76.5 (C-4<sub>B</sub>), 75.7 (C-2<sub>B</sub>), 75.2 (PhCH<sub>2</sub>), 74.6 (PhCH<sub>2</sub>), 71.3 (PhCH<sub>2</sub>), 70.9 (PhCH<sub>2</sub>), 68.7 (C-6<sub>C</sub>), 68.6 (C-6<sub>B</sub>), 68.5 (OCH<sub>2</sub>), 68.4 (C-6<sub>A</sub>), 66.8 (C-5<sub>C</sub>), 65.6 (C-3<sub>C</sub>), 64.1 (C-5<sub>B</sub>), 55.2 (OMe), 50.9 (NCH<sub>2</sub>); ESI-MS: 1250.4 [M+Na]<sup>+</sup>; Anal. Calcd. for C<sub>70</sub>H<sub>73</sub>N<sub>3</sub>O<sub>17</sub> (1228.36): C, 68.45; H, 5.99; found: C, 68.30; H, 6.15.

**Compound 49:** <sup>1</sup>H NMR (500 MHz CDCl<sub>3</sub>): δ 7.92-6.72 (m, 52 H, Ar-H), 5.89 (dd, *J* = 9.0 Hz, 3.0 Hz, 1 H, H-3<sub>C</sub>), 5.62 (br s, 1 H, PhCH), 5.39 (d, *J* = 2.5 Hz, 1 H, H-4<sub>B</sub>), 4.92 (d, *J* = 11.0 Hz, 1 H, PhCH), 4.82-4.79 (m, 2 H, PhCH), 4.77 (d, *J* = 3.0 Hz, 1 H, H-1<sub>C</sub>), 4.75-4.54 (m, 10 H, H-2<sub>C</sub>, 9 PhCH), 4.45 (d, *J* = 9.0 Hz, 1 H, H-1<sub>A</sub>), 4.42 (br s, 1 H, H-1<sub>D</sub>), 4.39 (d, *J* = 11.0 Hz, 1 H, PhCH), 4.30-4.27 (m, 3 H, H-4<sub>C</sub>, H-6<sub>abd</sub>), 4.21 (d, *J* = 12.0 Hz, 1 H, PhCH), 4.11-4.08 (m, 3 H, H-5<sub>B</sub>, H-6<sub>abc</sub>), 3.95-3.91 (m, 3 H, H-5<sub>B</sub>, H-6<sub>aA</sub>, H-6<sub>aB</sub>), 3.86 (t, *J* = 9.0 Hz, 1 H, H-4<sub>D</sub>), 3.82 (d, *J* = 3.0 Hz, 1 H, H-4<sub>A</sub>), 3.79-3.76 (m, 2 H, H-2<sub>D</sub>, H-6<sub>bB</sub>), 3.75 (br s, 6 H, 2 OMe), 3.69-3.68 (m, 1 H, H-6<sub>bA</sub>), 3.51-3.49 (m, 2 H, H-5<sub>A</sub>, H-5<sub>C</sub>), 3.46-3.43 (m, 2 H, H-2<sub>B</sub>, H-5<sub>A</sub>), 3.31-3.24 (m, 3 H, H-2<sub>A</sub>, H-3<sub>A</sub>, H-3<sub>B</sub>), 3.23-3.19 (m, 1 H, H-5<sub>D</sub>), 2.10 (br s, 3 H, COCH<sub>3</sub>); <sup>13</sup>C NMR (125 MHz, CDCl<sub>3</sub>): δ 170.3 (COCH<sub>3</sub>), 155.1 (COPh), 151.3-113.7 (Ar-C), 102.3 (*J*<sub>C1/H1</sub> = 158 Hz; C-1<sub>D</sub>), 102.1 (C-1<sub>A</sub>), 101.4 (PhCH), 98.7 (C-1<sub>C</sub>), 97.7 (C-1<sub>B</sub>), 81.9 (C-5<sub>A</sub>), 79.0 (C-3<sub>D</sub>), 78.5 (C-5<sub>B</sub>), 77.5 (C-3<sub>A</sub>), 76.5 (2 C, C-5<sub>C</sub>, C-4<sub>A</sub>), 75.5 (C-5<sub>D</sub>), 75.2 (PhCH<sub>2</sub>), 75.1 (PhCH<sub>2</sub>), 75.0 (C-3<sub>B</sub>), 74.1 (PhCH<sub>2</sub>), 73.6 (C-2<sub>D</sub>), 73.3 (C-4<sub>D</sub>), 73.2 (PhCH<sub>2</sub>), 73.1 (C-2<sub>C</sub>), 73.0 (PhCH<sub>2</sub>), 72.9 (PhCH<sub>2</sub>), 72.0 (PhCH<sub>2</sub>), 71.1 (C-4<sub>B</sub>), 70.6 (C-3<sub>C</sub>), 68.8 (C-6<sub>B</sub>), 68.4 (C-6<sub>D</sub>), 67.8 (C-6<sub>C</sub>), 67.5 (C-2<sub>A</sub>), 67.4 (C-4<sub>C</sub>), 67.0 (C-6<sub>A</sub>), 66.3 (C-2<sub>B</sub>), 20.9 (COCH<sub>3</sub>); ESI-MS: 1860.7 [M+Na]<sup>+</sup>; Anal. Calcd. for C<sub>107</sub>H<sub>107</sub>NO<sub>27</sub> (1839.01): C, 69.88; H, 5.86; found: C, 69.70; H, 6.05.

**Compound 50:** <sup>1</sup>H NMR (500 MHz, CDCl<sub>3</sub>): δ 7.47-6.79 (m, 14 H, Ar-H), 5.58 (s, 1 H, PhCH), 4.92 (d, *J* = 12.0 Hz, 1 H, PhCH), 4.83 (d, *J* = 12.5 Hz, 1 H, PhCH), 4.60 (d, *J* = 12.0 Hz, 1 H, PhCH), 4.51 (d, *J* = 12.0 Hz, 1 H, PhCH), 4.48 (br s, 1 H, H-1), 4.27 (dd, *J* = 10.5 Hz, 5.0 Hz, 1 H, H-6<sub>a</sub>), 4.20-4.13 (m, 2 H, H-4, OCH), 3.91-3.87 (m, 2 H, H-2, H-6<sub>b</sub>), 3.77 (s, 3 H, OMe),

3.75-3.74 (m, 1 H, OCH), 3.53 (dd,  $J = 10.0$  Hz, 3.5 Hz, 1 H, H-3), 3.48-3.42 (m, 2 H, BrCH<sub>2</sub>), 3.32-3.26 (m, 1 H, H-5); <sup>13</sup>C NMR (125 MHz, CDCl<sub>3</sub>):  $\delta$  159.3-113.8 (Ar-C), 102.4 (C-1), 101.5 (PhCH), 78.7 (C-4), 77.4 (C-3), 75.9 (C-2), 74.9 (PhCH<sub>2</sub>), 72.2 (PhCH<sub>2</sub>), 69.7 (OCH<sub>2</sub>), 68.5 (C-6), 67.8 (C-5), 55.1 (OMe), 30.0 (BrCH<sub>2</sub>); ESI-MS: 607.1 [M+Na]<sup>+</sup>; Anal. Calcd. for C<sub>30</sub>H<sub>33</sub>BrO<sub>7</sub> (585.48): C, 61.54; H, 5.68; found: C, 61.40; H, 5.80.

**Compound 51:** <sup>1</sup>H NMR (500 MHz CDCl<sub>3</sub>):  $\delta$  7.45-6.80 (m, 19 H, Ar-H), 5.55 (s, 1 H, PhCH), 5.02 (d,  $J = 12.0$  Hz, 1 H, PhCH), 4.92 (d,  $J = 11.5$  Hz, 1 H, PhCH), 4.74 (d,  $J = 11.5$  Hz, 1 H, PhCH), 4.68 (br s, 1 H, H-1<sub>B</sub>), 4.64-4.57 (m, 3 H, 3 PhCH), 4.44-4.36 (m, 2 H, OCH<sub>2</sub>), 4.26 (dd,  $J = 10.5$  Hz, 5.0 Hz, 1 H, H-6<sub>aB</sub>), 4.19 (d,  $J = 7.5$  Hz, 1 H, H-1<sub>A</sub>), 4.04 (t,  $J = 9.5$  Hz, 1 H, H-4<sub>B</sub>), 3.87-3.83 (m, 2 H, H-2<sub>B</sub>, H-6<sub>bB</sub>), 3.77 (s, 3 H, OMe), 3.72 (dd,  $J = 9.5$  Hz, 7.5 Hz, 1 H, H-2<sub>A</sub>), 3.63 (dd,  $J = 10.0$  Hz, 3.0 Hz, 1 H, H-3<sub>A</sub>), 3.54 (t,  $J = 9.5$  Hz, 1 H, H-4<sub>A</sub>), 3.53 (s, 3 H, OMe), 3.48-3.46 (m, 1 H, H-5<sub>A</sub>), 3.38 (dd,  $J = 10.0$  Hz, 3.0 Hz, 1 H, H-3<sub>B</sub>), 3.22-3.19 (m, 1 H, H-5<sub>B</sub>), 2.31 (br s, 1 H, CH), 1.14 (d,  $J = 6.5$  Hz, 3 H, Me); <sup>13</sup>C NMR (125 MHz, CDCl<sub>3</sub>):  $\delta$  159.2-113.7 (Ar-C), 104.7 (C-1<sub>A</sub>), 103.0 ( $J_{C1/H1} = 156$  Hz; C-1<sub>B</sub>), 101.4 (PhCH), 82.1 (C-3<sub>A</sub>), 79.6 (C-2<sub>A</sub>), 78.5 (C-4<sub>B</sub>), 77.8 (C-4<sub>A</sub>), 77.4 (C-3<sub>B</sub>), 75.7 (C-2<sub>B</sub>), 75.0 (PhCH<sub>2</sub>), 74.2 (PhCH<sub>2</sub>), 72.2 (PhCH<sub>2</sub>), 70.2 (C-5<sub>A</sub>), 67.4 (C-6<sub>B</sub>), 65.1 (C-5<sub>B</sub>), 60.0 (OCH<sub>2</sub>), 56.7 (OMe), 55.0 (OMe), 16.6 (CH<sub>3</sub>); ESI-MS: 789.3 [M+Na]<sup>+</sup>; Anal. Calcd. for C<sub>45</sub>H<sub>50</sub>O<sub>11</sub> (766.88): C, 70.48; H, 6.57; found: C, 70.30; H, 6.65.

**Compound 52:** <sup>1</sup>H NMR (500 MHz CDCl<sub>3</sub>):  $\delta$  7.48-6.75 (m, 14 H, Ar-H), 5.52 (s, 1 H, PhCH), 5.45 (d,  $J = 4.0$  Hz, 1 H, H-1<sub>A</sub>), 5.44 (t,  $J = 8.5$  Hz, 1 H, H-3<sub>A</sub>), 5.36 (br s, 1 H, NH), 4.79 (d,  $J = 12.0$  Hz, 1 H, PhCH), 4.68-4.59 (m, 4 H, CH<sub>2</sub>CCl<sub>3</sub>, 2 PhCH), 4.44-4.37 (m, 3 H, OCH<sub>2</sub>, PhCH), 4.35 (br s, 1 H, H-1<sub>B</sub>), 4.27 (dd,  $J = 10.5$  Hz, 5.0 Hz, 1 H, H-6<sub>aB</sub>), 4.09 (dd,  $J = 10.0$  Hz, 3.0 Hz, 1 H, H-2<sub>A</sub>), 4.03 (t,  $J = 9.5$  Hz, 1 H, H-4<sub>A</sub>), 3.95 (t,  $J = 9.5$  Hz, 1 H, H-4<sub>A</sub>), 3.93-3.91 (m, 1 H, H-5<sub>A</sub>), 3.84 (d,  $J = 2.0$  Hz, 1 H, H-2<sub>B</sub>), 3.82-3.77 (m, 1 H, H-6<sub>bB</sub>), 3.76 (s, 3 H, OMe), 3.75 (s, 3 H, OMe), 3.74-3.71 (m, 1 H, H-6<sub>aA</sub>), 3.36 (dd,  $J = 10.0$  Hz, 1.5 Hz, 1 H, H-6<sub>bA</sub>), 3.10-3.08 (m, 1 H, H-5<sub>B</sub>), 2.36 (br s, 1 H, CH), 2.05 (s, 3 H, COCH<sub>3</sub>); <sup>13</sup>C NMR (125 MHz, CDCl<sub>3</sub>):  $\delta$  170.6 (COCH<sub>3</sub>), 159.2-113.7 (Ar-C), 101.7 (PhCH), 101.4 ( $J_{C1/H1} = 156.2$  Hz; C-1<sub>B</sub>), 96.7 (C-1<sub>A</sub>), 78.3 (C-4<sub>A</sub>), 75.2 (C-3<sub>B</sub>), 75.0 (C-4<sub>B</sub>), 74.8 (C-2<sub>B</sub>), 74.5 (PhCH<sub>2</sub>), 73.6 (PhCH<sub>2</sub>), 71.9 (CH<sub>2</sub>CCl<sub>3</sub>), 71.6 (C-5<sub>A</sub>), 76.7 (C-3<sub>A</sub>), 68.6 (C-6<sub>B</sub>), 68.1 (C-6<sub>A</sub>), 67.4 (C-5<sub>B</sub>), 59.6 (OCH<sub>2</sub>), 55.5 (OMe), 55.1 (OMe), 54.2 (C-2<sub>A</sub>), 21.0 (COCH<sub>3</sub>); ESI-MS: 1022.2 [M+Na]<sup>+</sup>; Anal. Calcd. for C<sub>49</sub>H<sub>52</sub>Cl<sub>3</sub>NO<sub>15</sub> (1001.30): C, 58.78; H, 5.23; found: C, 58.62; H, 5.40.

**Compound 53 ( $\alpha/\beta = 5/9$ ):** <sup>1</sup>H NMR (500 MHz, CDCl<sub>3</sub>):  $\delta$  7.52-6.77 (m, 106 H, Ar-H), 5.45 (br s, 1 H, H-1<sub>B $\alpha$</sub> ), 5.30 (d,  $J = 3.5$  Hz, 1 H, H-1<sub>A $\alpha$</sub> ), 5.20 (d,  $J = 3.5$  Hz, 1.76 H, H-1<sub>A $\beta$</sub> ), 5.15 (d,  $J = 11.5$  Hz, 1.76 H, PhCH <sub>$\beta$</sub> ), 5.09 (d,  $J = 11.5$  Hz, 1.76 H, PhCH <sub>$\beta$</sub> ), 4.90-4.60 (m, 13.6 H), 4.50 (br s, 1.76 H, H-1<sub>B $\beta$</sub> ), 4.49-4.21 (m, 22.1 H), 4.12-4.00 (m, 10.0 H), 3.96-3.80 (m, 8.30 H), 3.78-3.70 (m, 23 H), 3.68-3.60 (m, 12 H), 3.52-3.40 (m, 7.6 H), 1.24-1.22 (m, 8 H); <sup>13</sup>C NMR (125 MHz, CDCl<sub>3</sub>):  $\delta$  159.7-113.7 (Ar-C), 102.4 (C-1<sub>B $\beta$</sub> ), 99.1 (C-1<sub>B $\alpha$</sub> ), 97.9 (C-1<sub>A $\beta$</sub> ), 97.1 (C-1<sub>A $\alpha$</sub> ), 82.2, 79.9, 79.0, 77.0, 76.9, 76.0, 75.9, 75.5, 75.4, 75.3, 75.2, 75.1, 74.2, 74.0, 73.9, 73.8, 73.7, 73.5, 73.4, 73.3, 73.2, 71.2, 71.0, 70.9, 70.8, 70.7, 69.9, 67.2, 67.0, 63.0, 62.9, 61.0, 55.7, 55.5, 17.5,

17.4; ESI-MS: 1025.4 [M+Na]<sup>+</sup>; Anal. Calcd. for C<sub>62</sub>H<sub>66</sub>O<sub>12</sub> (1003.18): C, 74.23; H, 6.63; found: C, 74.05; H, 6.76.

**Compound 54 ( $\alpha/\beta = 4.4/10$ ):** <sup>1</sup>H NMR (500 MHz, CDCl<sub>3</sub>):  $\delta$  7.51-6.76 (m, 51 H, Ar-H), 5.60 (s, 0.44 H, PhCH <sub>$\alpha$</sub> ), 5.50 (br s, 0.44 H, H-1<sub>A $\alpha$</sub> ), 5.49 (s, 1 H, PhCH <sub>$\beta$</sub> ), 5.45 (br s, 1 H, H-1<sub>A $\beta$</sub> ), 5.21 (br s, 0.44 H, H-1<sub>B $\alpha$</sub> ), 5.08-4.85 (m, 6.9 H), 4.70-4.66 (m, 1.62 H), 4.62 (br s, 1 H, H-1<sub>B $\beta$</sub> ), 4.60-4.36 (m, 10 H), 4.22-4.10 (m, 6 H), 4.00-3.86 (m, 6.34 H), 3.78-3.65 (m, 14.6 H); <sup>13</sup>C NMR (125 MHz, CDCl<sub>3</sub>):  $\delta$  159.8-113.9 (Ar-C), 101.7 (PhCH <sub>$\beta$</sub> ), 101.5 (PhCH <sub>$\alpha$</sub> ), 100.3 (C-1<sub>B $\alpha$</sub> ), 99.5 (C-1<sub>B $\beta$</sub> ), 98.6 (C-1<sub>A $\alpha$</sub> ), 97.1 (C-1<sub>A $\beta$</sub> ), 82.0, 79.4, 78.6, 77.0, 76.9, 76.5, 76.1, 76.0, 75.9, 75.7, 74.4, 74.3, 74.0, 73.9 (2 C), 73.0, 72.9, 72.2, 72.0, 71.8, 70.7, 70.6, 69.9, 69.8, 69.7, 69.6, 65.4, 65.3, 65.2, 55.4, 55.3; ESI-MS: 1039.4 [M+Na]<sup>+</sup>; Anal. Calcd. for C<sub>62</sub>H<sub>64</sub>O<sub>13</sub> (1017.16): C, 73.21; H, 6.34; found: C, 73.02; H, 6.50.

**Compound 55:** <sup>1</sup>H NMR (500 MHz CDCl<sub>3</sub>):  $\delta$  7.52-6.82 (m, 29 H, Ar-H), 5.62 (s, 1 H, PhCH), 4.97-4.92 (m, 3 H, 3 PhCH), 4.86-4.83 (m, 3 H, 3 PhCH), 4.76 (d,  $J = 11.5$  Hz, 1 H, PhCH), 4.64 (d,  $J = 11.5$  Hz, 1 H, PhCH), 4.56-4.54 (m, 2 H, 2 PhCH), 4.43 (d,  $J = 7.5$  Hz, 1 H, H-1<sub>A</sub>), 4.31-4.30 (m, 2 H, H-1<sub>B</sub>, H-6<sub>aB</sub>), 4.19-4.14 (m, 2 H, H-6<sub>aA</sub>, H-4<sub>B</sub>), 3.95-3.90 (m, 1 H, H-6<sub>bB</sub>), 3.81 (s, 3 H, OMe), 3.78-3.77 (m, 1 H, H-2<sub>B</sub>), 3.70 (t,  $J = 8.5$  Hz, 1 H, H-3<sub>A</sub>), 3.51-3.48 (m, 3 H, H-4<sub>A</sub>, H-5<sub>A</sub>, H-6<sub>bA</sub>), 3.42-3.36 (m, 2 H, H-2<sub>A</sub>, H-3<sub>B</sub>), 3.26-3.25 (m, 1 H, H-5<sub>B</sub>), 2.70-2.62 (m, 2 H, SCH<sub>2</sub>), 1.24 (t,  $J = 7.5$  Hz, 3 H, CH<sub>3</sub>); <sup>13</sup>C NMR (125 MHz, CDCl<sub>3</sub>):  $\delta$  137.6-113.7 (Ar-C), 102.6 ( $J_{C1/H1} = 156$  Hz; C-1<sub>B</sub>), 101.4 (PhCH), 86.7 (C-3<sub>A</sub>), 84.8 (C-1<sub>A</sub>), 81.8 (C-3<sub>B</sub>), 78.8 (C-4<sub>A</sub>), 78.7 (C-4<sub>B</sub>), 78.0 (C-2<sub>A</sub>), 77.3 (C-5<sub>A</sub>), 75.8 (C-2<sub>B</sub>), 75.7 (PhCH<sub>2</sub>), 75.4 (PhCH<sub>2</sub>), 74.8 (PhCH<sub>2</sub>), 74.6 (PhCH<sub>2</sub>), 72.1 (PhCH<sub>2</sub>), 69.3 (C-6<sub>A</sub>), 68.5 (C-6<sub>B</sub>), 67.5 (C-5<sub>B</sub>), 55.1 (OMe), 24.8 (SCH<sub>2</sub>), 14.9 (CH<sub>3</sub>); ESI-MS: 977.4 [M+Na]<sup>+</sup>; Anal. Calcd. for C<sub>57</sub>H<sub>62</sub>O<sub>11</sub>S (955.17): C, 71.68; H, 6.54; found: C, 71.54; H, 6.65.

**Compound 56:** <sup>1</sup>H NMR (500 MHz CDCl<sub>3</sub>):  $\delta$  7.46-7.20 (m, 29 H, Ar-H), 6.02-5.95 (m, 1 H, CH<sub>2</sub>=CH), 5.47 (s, 1 H, PhCH), 5.36-5.32 (m, 1 H, CH<sub>2</sub>=CH), 5.23-5.20 (m, 1 H, CH<sub>2</sub>=CH), 5.07 (d,  $J = 11.5$  Hz, 1 H, PhCH), 4.98-4.94 (m, 2 H, 2 PhCH), 4.88 (br s, 1 H, H-1<sub>B</sub>), 4.80 (d,  $J = 12.0$  Hz, 1 H, PhCH), 4.69 (d,  $J = 11.5$  Hz, 1 H, PhCH), 4.64-4.60 (m, 2 H, 2 PhCH), 4.57-4.54 (m, 2 H, 2 PhCH), 4.43-4.42 (m, 1 H, H-6<sub>aB</sub>), 4.41 (d,  $J = 8.0$  Hz, 1 H, H-1<sub>A</sub>), 4.33 (d,  $J = 11.0$  Hz, 1 H, PhCH), 4.21-4.15 (m, 2 H, H-6<sub>aA</sub>, H-6<sub>bB</sub>), 3.68 (t,  $J = 9.0$  Hz, 1 H, H-4<sub>A</sub>), 3.78-3.69 (m, 3 H, H-3<sub>B</sub>, OCH<sub>2</sub>), 3.61 (t,  $J = 10.5$  Hz, 1 H, H-6<sub>bB</sub>), 3.51-3.44 (m, 5 H, H-2<sub>A</sub>, H-3<sub>A</sub>, H-2<sub>B</sub>, H-4<sub>B</sub>), 3.21-3.20 (m, 1 H, H-5<sub>B</sub>); <sup>13</sup>C NMR (125 MHz, CDCl<sub>3</sub>):  $\delta$  163.46-126.2 (Ar-C), 133.9 (CH<sub>2</sub>=CH), 117.3 (CH<sub>2</sub>=CH), 102.5 ( $J_{C1/H1} = 158.8$  Hz; C-1<sub>B</sub>), 102.3 (C-1<sub>A</sub>), 101.9 (PhCH), 82.7 (C-4<sub>A</sub>), 82.2 (C-4<sub>B</sub>), 79.3 (C-3<sub>B</sub>), 78.5 (C-2<sub>B</sub>), 76.1 (C-2<sub>A</sub>), 75.5 (PhCH<sub>2</sub>), 74.8 (PhCH<sub>2</sub>), 74.4 (PhCH<sub>2</sub>), 74.5 (PhCH<sub>2</sub>), 74.4 (C-3<sub>A</sub>), 73.4 (PhCH<sub>2</sub>), 70.8 (C-5<sub>A</sub>), 70.2 (C-6<sub>A</sub>), 68.7 (C-6<sub>B</sub>), 68.5 (OCH<sub>2</sub>), 66.8 (C-5<sub>B</sub>), 55.1 (OMe); ESI-MS: 973.4 [M+Na]<sup>+</sup>; Anal. Calcd. for C<sub>58</sub>H<sub>62</sub>O<sub>12</sub> (951.12): C, 73.24; H, 6.57; found: C, 73.10; H, 6.75.

**Compound 57:** <sup>1</sup>H NMR (500 MHz CDCl<sub>3</sub>):  $\delta$  7.44-6.80 (m, 29 H, Ar-H), 5.91-5.81 (m, 1 H, CH=CH<sub>2</sub>), 5.48 (s, 1 H, PhCH), 5.27-5.17 (m, 2 H, CH=CH<sub>2</sub>), 4.86 (br s, 1 H, H-1<sub>A</sub>), 4.83-4.49

(m, 9 H, 9 PhCH), 4.48 (br s, 1 H, H-1<sub>B</sub>), 4.38 (d,  $J = 12.0$  Hz, 1 H, PhCH), 4.19-4.14 (m, 2 H, OCH, H-2<sub>B</sub>), 4.04-3.93 (m, 3 H, H-4<sub>B</sub>, H-6<sub>aB</sub>, OCH), 3.87-3.86 (m, 1 H, H-3<sub>A</sub>), 3.78 (s, 3 H, OMe), 3.75-3.74 (m, 2 H, H-2<sub>A</sub>, H-6<sub>bB</sub>), 3.68-3.64 (m, 2 H, H-5<sub>A</sub>, H-6<sub>aA</sub>), 3.60-3.57 (m, 2 H, H-4<sub>A</sub>, H-6<sub>bA</sub>), 3.37-3.35 (m, 1 H, H-3<sub>B</sub>), 3.04-3.03 (m, 1 H, H-5<sub>B</sub>); <sup>13</sup>C NMR (125 MHz, CDCl<sub>3</sub>):  $\delta$  159.1-113.7 (Ar-C), 117.2 (CH=CH<sub>2</sub>), 101.9 ( $J_{C1/H1} = 160$  Hz; C-1<sub>B</sub>), 101.3 (PhCH), 97.5 (C-1<sub>A</sub>), 78.7 (C-4<sub>B</sub>), 78.0 (C-3<sub>B</sub>), 77.9 (C-2<sub>B</sub>), 76.9 (C-3<sub>A</sub>), 76.1 (C-4<sub>A</sub>), 75.6 (C-2<sub>A</sub>), 74.8 (PhCH<sub>2</sub>), 73.4 (PhCH<sub>2</sub>), 72.8 (PhCH<sub>2</sub>), 72.5 (PhCH<sub>2</sub>), 71.4 (PhCH<sub>2</sub>), 69.1 (C-6<sub>A</sub>), 68.5 (C-6<sub>B</sub>), 67.9 (OCH<sub>2</sub>), 55.1 (OMe); ESI-MS: 973.4 [M+Na]<sup>+</sup>; Anal. Calcd. for C<sub>58</sub>H<sub>62</sub>O<sub>12</sub> (951.12): C, 73.24; H, 6.57; found: C, 73.11; H, 6.68.

**Compound 58:** <sup>1</sup>H NMR (500 MHz CDCl<sub>3</sub>):  $\delta$  7.79-6.82 (m, 29 H, Ar-H), 5.61 (s, 1 H, PhCH), 5.01 (d,  $J = 12.0$  Hz, 1 H, PhCH), 4.94 (d,  $J = 11.5$  Hz, 1 H, PhCH), 4.86-4.76 (m, 6 H, 6 PhCH), 4.71 (br s, 1 H, H-1<sub>A</sub>), 4.67 (d,  $J = 11.5$  Hz, 1 H, PhCH), 4.51 (d,  $J = 11.5$  Hz, 1 H, PhCH), 4.25-4.05 (m, 2 H, H-3<sub>B</sub>, H-6<sub>aB</sub>), 4.04-4.02 (m, 3 H, H-1<sub>B</sub>, H-4<sub>A</sub>, H-6<sub>aA</sub>), 3.91 (t,  $J = 12.0$  Hz, 1 H, H-6<sub>bB</sub>), 3.81-3.79 (m, 1 H, H-5<sub>A</sub>), 3.73-3.71 (m, 1 H, OCH), 3.68 (br s, 1 H, H-2<sub>A</sub>), 3.53-3.43 (m, 5 H, H-2<sub>B</sub>, H-3<sub>A</sub>, H-3<sub>B</sub>, OCH, H-6<sub>bA</sub>), 3.40-3.39 (m, 1 H, NCH), 3.36-3.35 (m, 1 H, NCH), 3.22-3.21 (m, 1 H, H-5<sub>B</sub>); <sup>13</sup>C NMR (125 MHz, CDCl<sub>3</sub>):  $\delta$  138.0-114.4 (Ar-C), 102.1 ( $J_{C1/H1} = 157.5$  Hz; C-1<sub>B</sub>), 101.6 (PhCH), 97.0 (C-1<sub>A</sub>), 81.9 (C-4<sub>A</sub>), 79.8 (C-4<sub>B</sub>), 78.6 (C-3<sub>B</sub>), 77.7 (2C, C-2<sub>B</sub>, C-3<sub>A</sub>), 75.8 (PhCH<sub>2</sub>), 75.6 (C-2<sub>A</sub>), 74.9 (PhCH<sub>2</sub>), 74.6 (PhCH<sub>2</sub>), 73.2 (PhCH<sub>2</sub>), 72.5 (PhCH<sub>2</sub>), 69.9 (C-5<sub>A</sub>), 68.5 (C-6<sub>A</sub>), 68.0 (C-6<sub>A</sub>), 67.5 (C-5<sub>B</sub>), 66.4 (OCH<sub>2</sub>), 50.5 (NCH<sub>2</sub>); ESI-MS: 1022.4 [M+Na]<sup>+</sup>; Anal. Calcd. for C<sub>60</sub>H<sub>61</sub>N<sub>3</sub>O<sub>11</sub> (1000.16): C, 72.05; H, 6.15; found: C, 71.94; H, 6.25.

**Compound 59:** <sup>1</sup>H NMR (500 MHz CDCl<sub>3</sub>):  $\delta$  7.81-6.80 (m, 31 H, Ar-H), 5.58 (s, 1 H, PhCH), 5.27 (d,  $J = 3.5$  Hz, 1 H, H-1<sub>A</sub>), 5.08 (d,  $J = 11.5$  Hz, 1 H, PhCH), 4.89-4.75 (m, 5 H, 5 PhCH), 4.70 (d,  $J = 11.5$  Hz, 1 H, PhCH), 4.58 (d,  $J = 12.0$  Hz, 1 H, PhCH), 4.56 (br s, 1 H, H-1<sub>B</sub>), 4.26 (t,  $J = 10.0$  Hz, 1 H, H-4<sub>B</sub>), 4.16 (dd,  $J = 10.5$  Hz, 5.0 Hz, 1 H, H-6<sub>aB</sub>), 4.07-4.04 (m, 4 H, H-2<sub>B</sub>, H-3<sub>A</sub>, H-4<sub>A</sub>, H-5<sub>A</sub>), 3.98 (dd,  $J = 9.0$  Hz, 3.5 Hz, 1 H, H-2<sub>A</sub>), 3.76 (s, 3 H, OMe), 3.72 (t,  $J = 10.5$  Hz, 1 H, H-6<sub>bB</sub>), 3.60 (dd,  $J = 9.5$  Hz, 2.5 Hz, 1 H, H-3<sub>B</sub>), 3.28 (m, 1 H, H-5<sub>B</sub>), 1.16 (d,  $J = 6.5$  Hz, 3 H, Me); <sup>13</sup>C NMR (125 MHz, CDCl<sub>3</sub>):  $\delta$  154.9-114.5 (Ar-C), 103.4 ( $J_{C1/H1} = 158.5$  Hz; C-1<sub>B</sub>), 101.4 (PhCH), 97.7 (C-1<sub>A</sub>), 78.5 (C-4<sub>B</sub>), 77.7 (C-3<sub>B</sub>), 77.3 (C-2<sub>B</sub>), 76.7 (C-4<sub>A</sub>), 75.7 (C-3<sub>A</sub>), 75.3 (C-2<sub>A</sub>), 74.7 (PhCH<sub>2</sub>), 73.7 (PhCH<sub>2</sub>), 72.1 (PhCH<sub>2</sub>), 71.1 (PhCH<sub>2</sub>), 68.4 (C-6<sub>B</sub>), 67.8 (C-5<sub>B</sub>), 66.6 (C-5<sub>A</sub>), 55.5 (OMe), 17.0 (Me); ESI-MS: 953.4 [M+Na]<sup>+</sup>; Anal. Calcd. for C<sub>58</sub>H<sub>58</sub>O<sub>11</sub> (931.09): C, 74.82; H, 6.28; found: C, 74.70; H, 6.45.

**Compound 60:** <sup>1</sup>H NMR (500 MHz CDCl<sub>3</sub>):  $\delta$  7.79-6.80 (m, 31 H, Ar-H), 5.61 (s, 1 H, PhCH), 5.07 (d,  $J = 11.5$  Hz, 1 H, PhCH), 4.95 (d,  $J = 11.5$  Hz, 1 H, PhCH), 4.91 (d,  $J = 11.5$  Hz, 1 H, PhCH), 4.82 (d,  $J = 11.5$  Hz, 1 H, PhCH), 4.76-4.70 (m, 2 H, 2 PhCH), 4.66-4.60 (m, 2 H, 2 PhCH), 4.54 (br s, 1 H, H-1<sub>B</sub>), 4.24 (dd,  $J = 10.5$  Hz, 5.0 Hz, 1 H, H-6<sub>bB</sub>), 4.21 (t,  $J = 9.5$  Hz, 1 H, H-4<sub>B</sub>), 4.12 (br s, 1 H, H-2<sub>A</sub>), 4.10 (dd,  $J = 9.5$  Hz, 3.0 Hz, 1 H, H-3<sub>A</sub>), 4.06 (d,  $J = 2.5$  Hz, 1 H, H-2<sub>B</sub>), 3.90 (t,  $J = 10.5$  Hz, 1 H, H-4<sub>A</sub>), 3.85-3.82 (m, 1 H, H-5<sub>A</sub>), 3.77 (s, 3 H, OMe), 3.55 (t,  $J = 9.5$  Hz, 1 H, H-6<sub>bB</sub>), 3.49 (dd,  $J = 10.0$  Hz, 3.0 Hz, 1 H, H-3<sub>B</sub>), 3.21-3.18 (m, 1 H, H-5<sub>B</sub>), 1.30 (d,  $J = 6.5$  Hz, 3 H, Me); <sup>13</sup>C NMR (125 MHz, CDCl<sub>3</sub>):  $\delta$  154.8-114.6 (Ar-C), 103.3 ( $J_{C1/H1}$

= 158 Hz; C-1<sub>B</sub>), 101.4 (PhCH), 97.8 (C-1<sub>A</sub>), 80.5 (C-4<sub>B</sub>), 80.0 (C-3<sub>B</sub>), 78.3 (C-2<sub>B</sub>), 77.7 (C-4<sub>A</sub>), 75.9 (C-3<sub>A</sub>), 75.5 (C-2<sub>A</sub>), 75.4 (PhCH<sub>2</sub>), 74.8 (PhCH<sub>2</sub>), 72.2 (PhCH<sub>2</sub>), 72.0 (PhCH<sub>2</sub>), 68.5 (C-6<sub>B</sub>), 68.4 (C-5<sub>A</sub>), 67.7 (C-5<sub>B</sub>), 55.6 (OMe), 18.2 (Me); ESI-MS: 953.4 [M+Na]<sup>+</sup>; Anal. Calcd. for C<sub>58</sub>H<sub>58</sub>O<sub>11</sub> (931.09): C, 74.82; H, 6.28; found: C, 74.67; H, 6.45.

**Compound 61:** <sup>1</sup>H NMR (500 MHz CDCl<sub>3</sub>): δ 7.71-7.26 (m, 17 H, Ar-H), 5.62 (s, 1 H, PhCH), 5.55 (d, *J* = 5.0 Hz, 1 H, H-1<sub>A</sub>), 5.04 (d, *J* = 12.0 Hz, 1 H, PhCH), 4.92 (d, *J* = 12.0 Hz, 1 H, PhCH), 4.68 (br s, 2 H, 2 PhCH), 4.59 (dd, *J* = 7.5 Hz, 2.0 Hz, 1 H, H-3<sub>A</sub>), 4.52 (br s, 1 H, H-1<sub>B</sub>), 4.31-4.27 (m, 2 H, H-2<sub>A</sub>, H-6<sub>aB</sub>), 4.22-4.18 (m, 2 H, H-4<sub>A</sub>, H-4<sub>B</sub>), 4.14 (dd, *J* = 10.5 Hz, 2.0 Hz, 1 H, H-6<sub>aA</sub>), 4.07-4.05 (m, 1 H, H-5<sub>A</sub>), 4.03 (d, *J* = 10.5 Hz, 1 H, H-2<sub>B</sub>), 3.89 (t, *J* = 10.5 Hz, 1 H, H-6<sub>bB</sub>), 3.62-3.56 (m, 2 H, H-3<sub>B</sub>, H-6<sub>bA</sub>), 3.32-3.29 (m, 1 H, H-5<sub>B</sub>), 1.49 (s, 3 H, CH<sub>3</sub>), 1.42 (s, 3 H, CH<sub>3</sub>), 1.33 (s, 3 H, CH<sub>3</sub>), 1.30 (s, 3 H, CH<sub>3</sub>); <sup>13</sup>C NMR (125 MHz, CDCl<sub>3</sub>): δ 138.4-125.5 (Ar-C), 109.5 {C(CH<sub>3</sub>)<sub>2</sub>}, 108.7 {C(CH<sub>3</sub>)<sub>2</sub>}, 102.9 (*J*<sub>C1/H1</sub> = 160 Hz; C-1<sub>B</sub>), 101.5 (PhCH), 96.4 (C-1<sub>A</sub>), 78.5 (C-4<sub>B</sub>), 77.3 (C-3<sub>B</sub>), 74.8 (C-2<sub>B</sub>), 74.5 (PhCH<sub>2</sub>), 71.9 (PhCH<sub>2</sub>), 71.6 (C-4<sub>A</sub>), 70.8 (C-3<sub>A</sub>), 70.4 (C-2<sub>A</sub>), 70.0 (C-6<sub>A</sub>), 68.6 (C-6<sub>B</sub>), 68.0 (C-5<sub>A</sub>), 67.6 (C-5<sub>B</sub>), 26.0 (2 C, 2 CH<sub>3</sub>), 25.1 (CH<sub>3</sub>), 24.4 (CH<sub>3</sub>); ESI-MS: 763.3 [M+Na]<sup>+</sup>; Anal. Calcd. for C<sub>43</sub>H<sub>48</sub>O<sub>11</sub> (740.85): C, 69.71; H, 6.53; found: C, 69.56; H, 6.70.

**Compound 62:** <sup>1</sup>H NMR (500 MHz CDCl<sub>3</sub>): δ 7.79-6.79 (m, 19 H, Ar-H), 5.61 (s, 1 H, PhCH), 5.42 (d, *J* = 3.5 Hz, 1 H, H-1<sub>A</sub>), 4.98 (t, *J* = 9.5 Hz, 1 H, H-4<sub>A</sub>), 4.96-4.88 (m, 2 H, 2 PhCH), 4.56 (br s, 1 H, H-1<sub>B</sub>), 4.33 (dd, *J* = 10.0 Hz, 4.5 Hz, 1 H, H-6<sub>aB</sub>), 4.24 (d, *J* = 2.5 Hz, 1 H, H-2<sub>B</sub>), 4.21-4.15 (m, 2 H, H-3<sub>A</sub>, H-6<sub>aA</sub>), 4.11-4.03 (m, 2 H, H-5<sub>A</sub>, H-6<sub>bA</sub>), 3.81 (t, *J* = 10.5 Hz, 1 H, H-6<sub>bB</sub>), 3.76 (s, 3 H, OMe), 3.59 (dd, *J* = 10.0 Hz, 3.0 Hz, 1 H, H-3<sub>B</sub>), 3.51 (dd, *J* = 10.0 Hz, 3.5 Hz, 1 H, H-2<sub>A</sub>), 3.38-3.32 (m, 1 H, H-5<sub>B</sub>), 2.02 (s, 6 H, 2 COCH<sub>3</sub>), 0.12 (s, 3 H, CH<sub>3</sub>), 0.10 (s, 3 H, CH<sub>3</sub>); <sup>13</sup>C NMR (125 MHz, CDCl<sub>3</sub>): δ 170.2 (COCH<sub>3</sub>), 168.7 (COCH<sub>3</sub>), 155.7-114.6 (Ar-C), 102.2 (*J*<sub>C1/H1</sub> = 158 Hz; C-1<sub>B</sub>), 101.6 (PhCH), 97.2 (C-1<sub>A</sub>), 78.8 (C-4<sub>B</sub>), 77.9 (C-3<sub>B</sub>), 77.7 (C-3<sub>A</sub>), 72.5 (PhCH<sub>2</sub>), 71.4 (C-2<sub>B</sub>), 68.8 (C-5<sub>A</sub>), 68.7 (C-6<sub>B</sub>), 68.2 (C-4<sub>A</sub>), 67.5 (C-5<sub>B</sub>), 63.6 (C-2<sub>A</sub>), 62.1 (C-6<sub>A</sub>), 55.5 (OMe), 26.0 {3 C, (CH<sub>3</sub>)<sub>3</sub>}, 20.7 (COCH<sub>3</sub>), 20.6 (COCH<sub>3</sub>); ESI-MS: 922.3 [M+Na]<sup>+</sup>; Anal. Calcd. for C<sub>47</sub>H<sub>57</sub>N<sub>3</sub>O<sub>13</sub>Si (900.07): C, 62.72; H, 6.38; found: C, 62.60; H, 6.50.

**Compound 63:** <sup>1</sup>H NMR (500 MHz CDCl<sub>3</sub>): δ 7.81-6.78 (m, 26 H, Ar-H), 5.62 (s, 1 H, PhCH), 5.55 (s, 1 H, PhCH), 5.37 (br s, 1 H, H-1<sub>A</sub>), 4.93 (br s, 2 H, 2 PhCH), 4.82 (d, *J* = 12.0 Hz, 1 H, PhCH), 4.74 (d, *J* = 12.0 Hz, 1 H, PhCH), 4.46 (br s, 1 H, H-1<sub>B</sub>), 4.35 (br s, 1 H, H-2<sub>A</sub>), 4.25 (t, *J* = 10.0 Hz, 1 H, H-4<sub>A</sub>), 4.20-4.16 (m, 4 H, H-2<sub>B</sub>, H-4<sub>B</sub>, H-6<sub>aA</sub>, H-6<sub>aB</sub>), 3.91 (dd, *J* = 10.0 Hz, 5.0 Hz, 1 H, H-3<sub>A</sub>), 3.75-3.73 (m, 5 H, H-6<sub>bB</sub>, H-6<sub>bA</sub>, OMe), 3.56 (d, *J* = 9.5 Hz, 1 H, H-3<sub>B</sub>), 3.30-3.27 (m, 1 H, H-5<sub>B</sub>), 1.01 (br s, 9 H, C(CH<sub>3</sub>)<sub>3</sub>), 0.27 (s, 3 H, CH<sub>3</sub>), 0.23 (s, 3 H, CH<sub>3</sub>); <sup>13</sup>C NMR (125 MHz, CDCl<sub>3</sub>): δ 155.0-114.5 (Ar-C), 101.6 (PhCH), 101.5 (PhCH), 100.8 (*J*<sub>C1/H1</sub> = 160 Hz; C-1<sub>B</sub>), 97.4 (C-1<sub>A</sub>), 78.7 (C-4<sub>B</sub>), 78.0 (C-4<sub>A</sub>), 76.9 (C-3<sub>B</sub>), 75.4 (C-2<sub>A</sub>), 73.7 (C-3<sub>A</sub>), 72.2 (PhCH<sub>2</sub>), 71.8 (C-2<sub>B</sub>), 71.0 (PhCH<sub>2</sub>), 68.6 (C-6<sub>A</sub>), 68.5 (C-6<sub>B</sub>), 67.7 (C-5<sub>B</sub>), 64.6 (C-5<sub>A</sub>), 55.5 (OMe), 26.2 {3 C, C(CH<sub>3</sub>)<sub>3</sub>}; ESI-MS: 991.4 [M+Na]<sup>+</sup>; Anal. Calcd. for C<sub>57</sub>H<sub>64</sub>O<sub>12</sub>Si (969.21): C, 70.64; H, 6.66; found: C, 74.50; H, 6.75.

**Compound 64 ( $\alpha/\beta = 1.6/1$ ):**  $^1\text{H}$  NMR (500 MHz,  $\text{CDCl}_3$ ):  $\delta$  7.75-6.77 (m, 72 H, Ar-H), 5.48 (br s, 1 H, H-1 $_{\text{B}\alpha}$ ), 5.24-5.23 (m, 1.66 H, H-1 $_{\text{A}\alpha}$ , H-1 $_{\text{A}\beta}$ ), 5.18-5.08 (m, 1.42 H), 4.94-4.60 (m, 13.4 H), 4.58-4.50 (m, 6.64 H, H-1 $_{\text{B}\beta}$ , PhCH), 4.49-4.20 (m, 4.93 H), 4.14-4.02 (m, 5.8 H), 4.00-3.88 (m, 4.52 H), 3.85-3.40 (m, 15.1 H), 1.21 (d,  $J = 6.5$  Hz, 3.8 H), 1.16 (d,  $J = 6.5$  Hz, 2.34 H);  $^{13}\text{C}$  NMR (125 MHz,  $\text{CDCl}_3$ ):  $\delta$  156.7-113.7 (Ar-C), 102.5 (C-1 $_{\text{B}\beta}$ ), 99.0 (C-1 $_{\text{B}\alpha}$ ), 97.9 (C-1 $_{\text{A}\alpha}$ ), 97.1 (C-1 $_{\text{A}\beta}$ ), 82.2, 80.0, 79.1, 77.1, 77.0, 76.2, 76.0, 75.9, 75.8, 75.7, 75.6, 75.5, 75.4, 74.0, 73.9, 73.8 (2C), 73.7, 73.6, 73.5, 72.2, 72.0, 71.1, 71.0, 70.8, 70.0, 67.2, 67.0, 55.8 (2C), 18.2 (2 C); ESI-MS: 1045.4  $[\text{M}+\text{Na}]^+$ ; Anal. Calcd. for  $\text{C}_{65}\text{H}_{66}\text{O}_{11}$  (1023.21): C, 76.30; H, 6.50; found: C, 76.14; H, 6.66.



# NMR spectra of synthesized compounds:

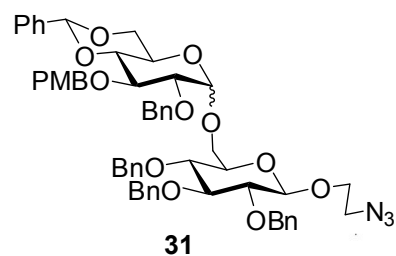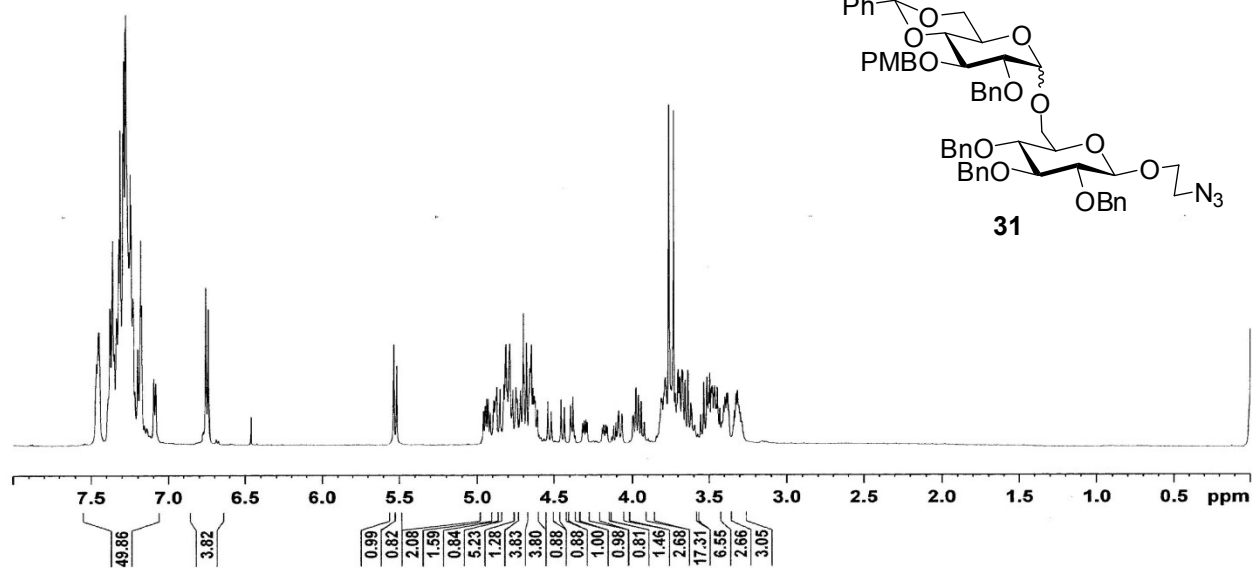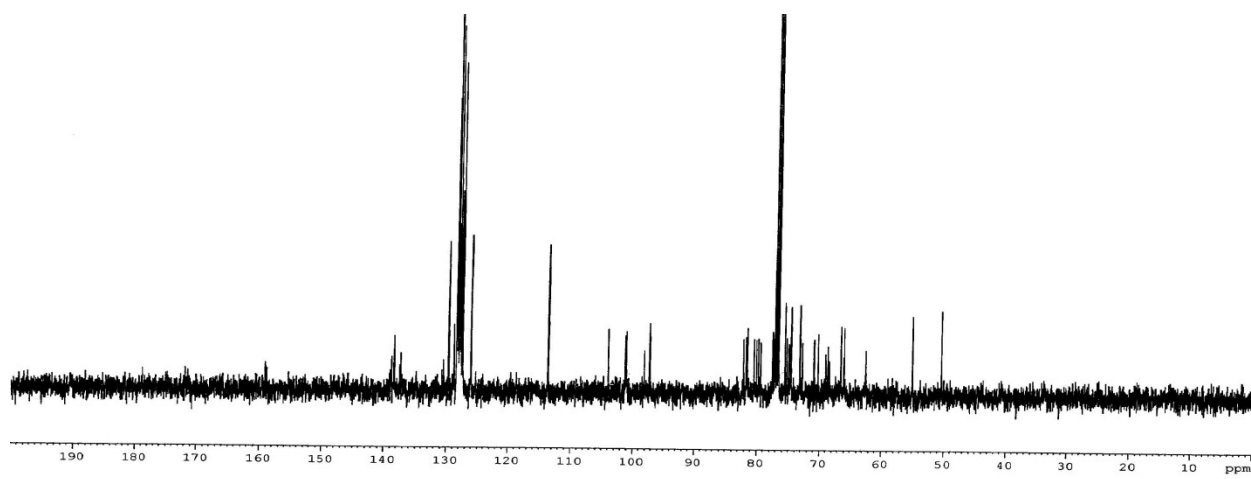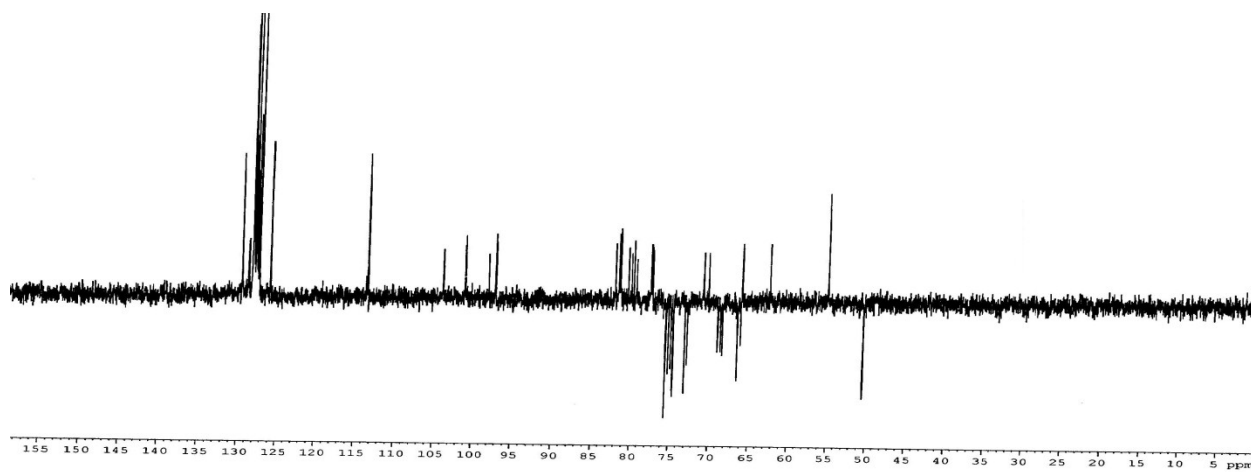

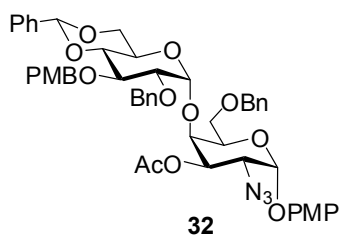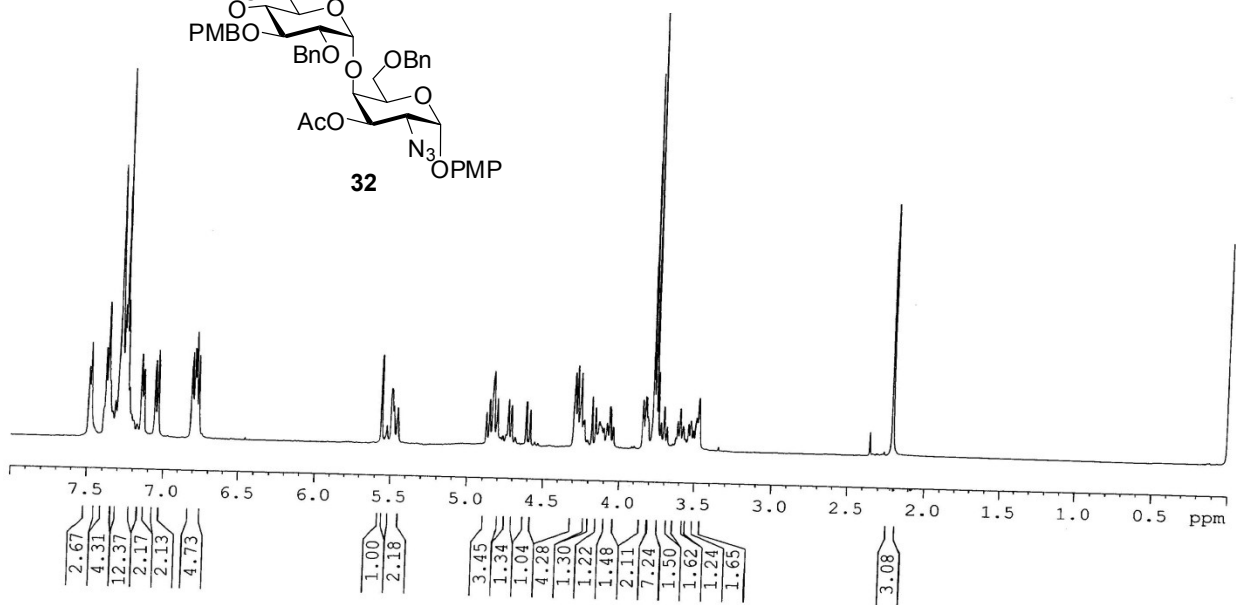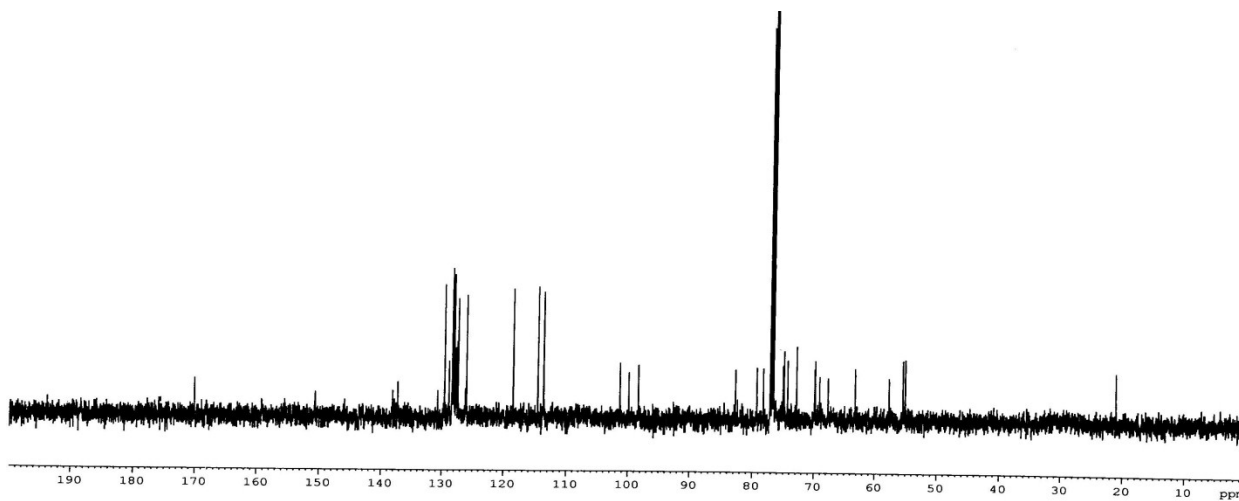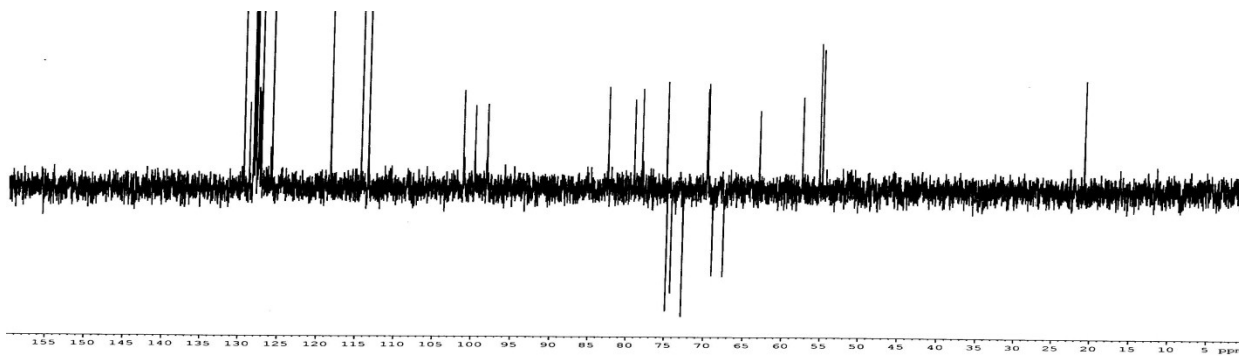

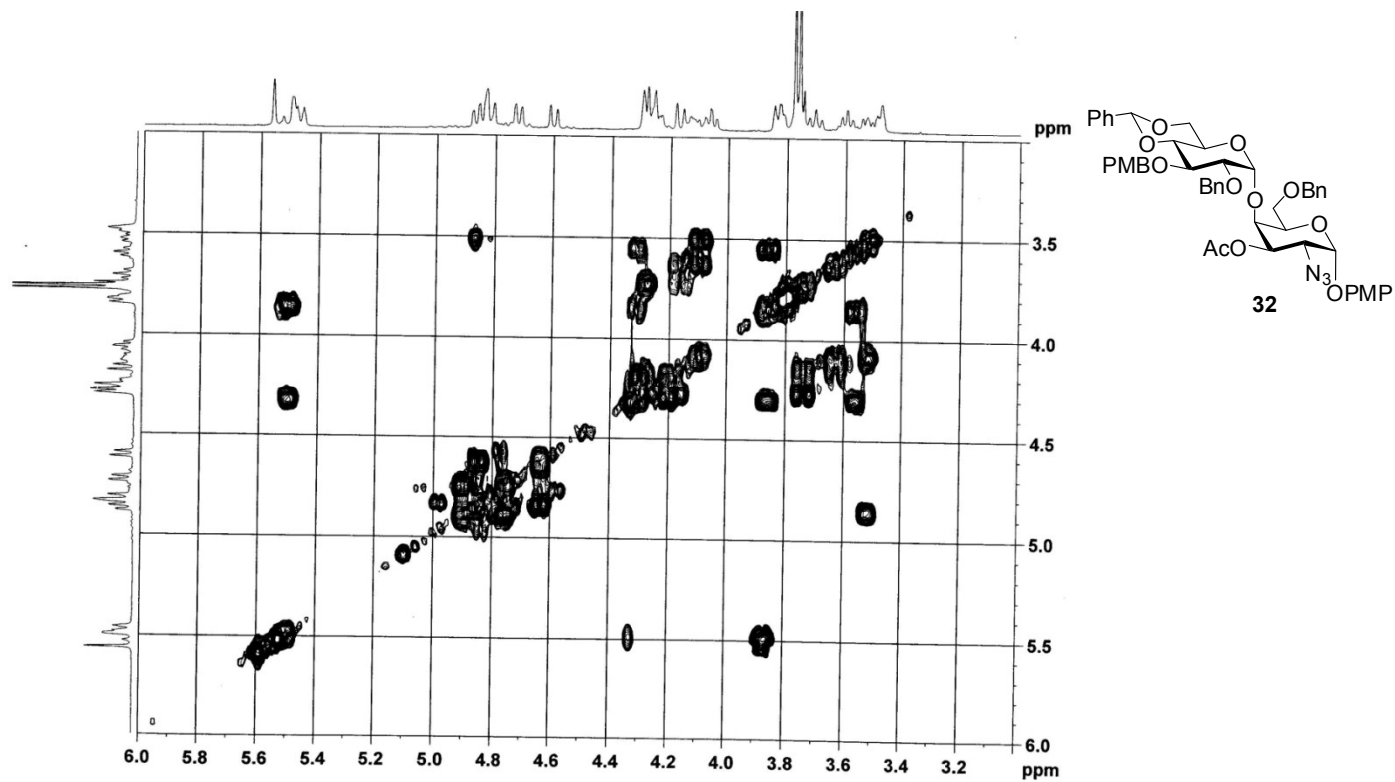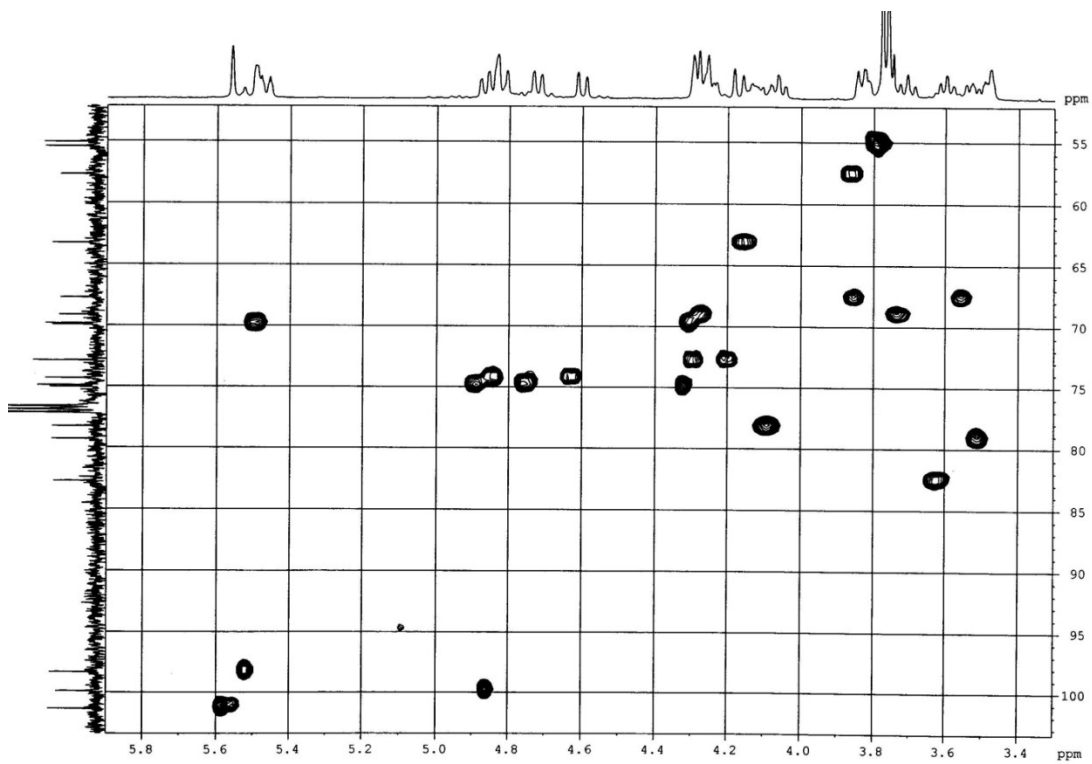

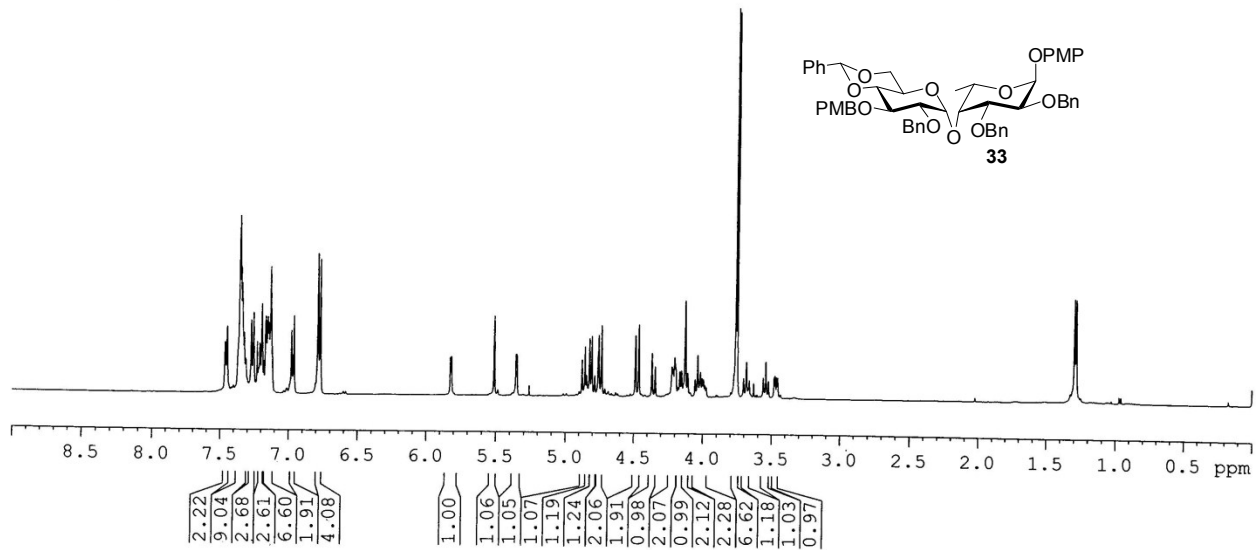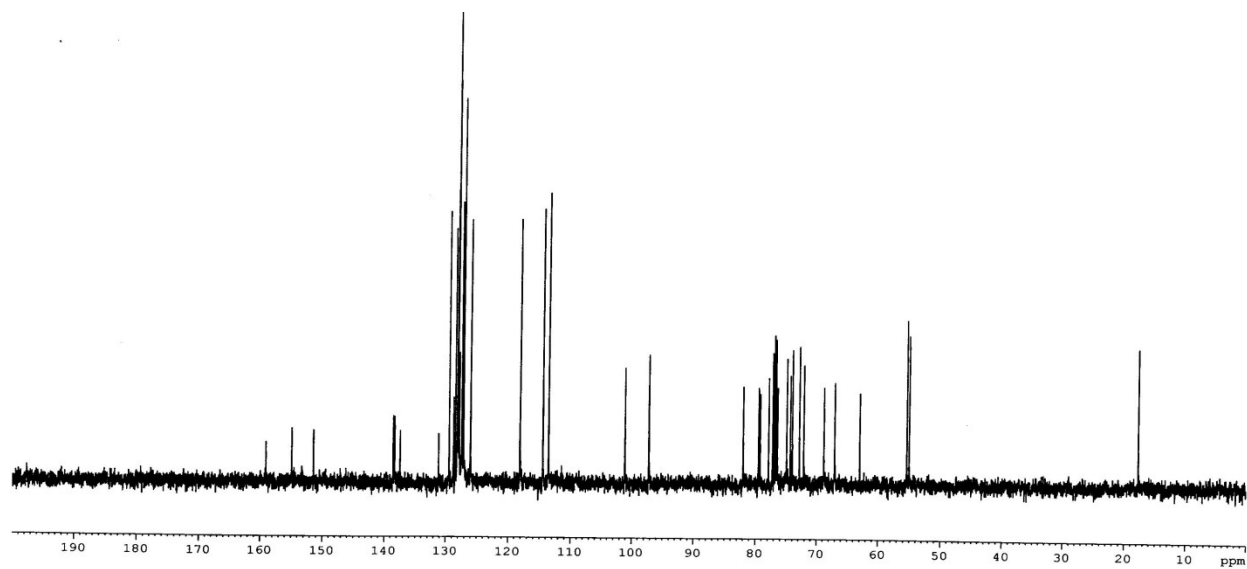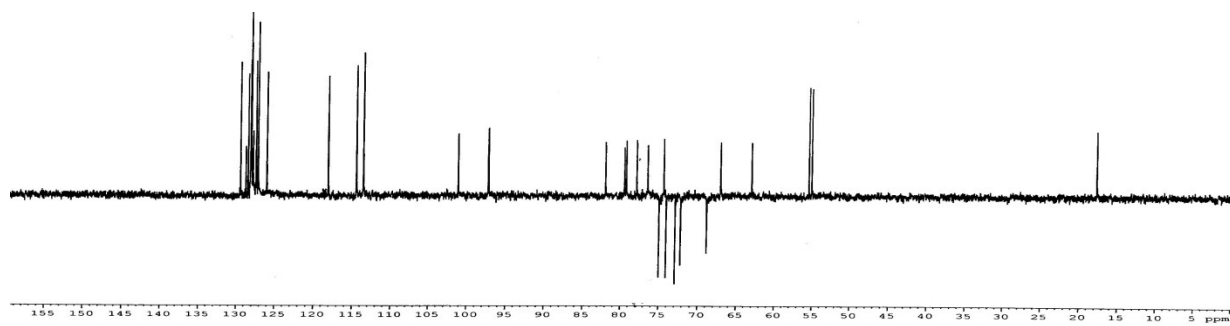

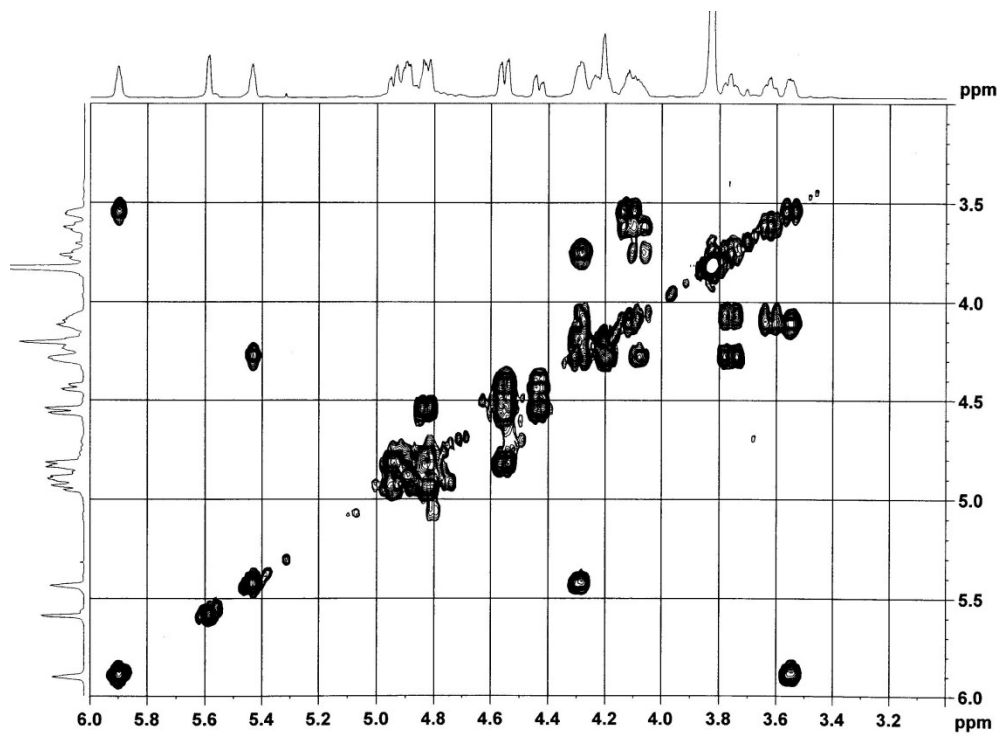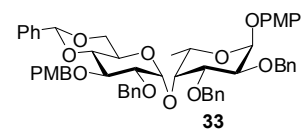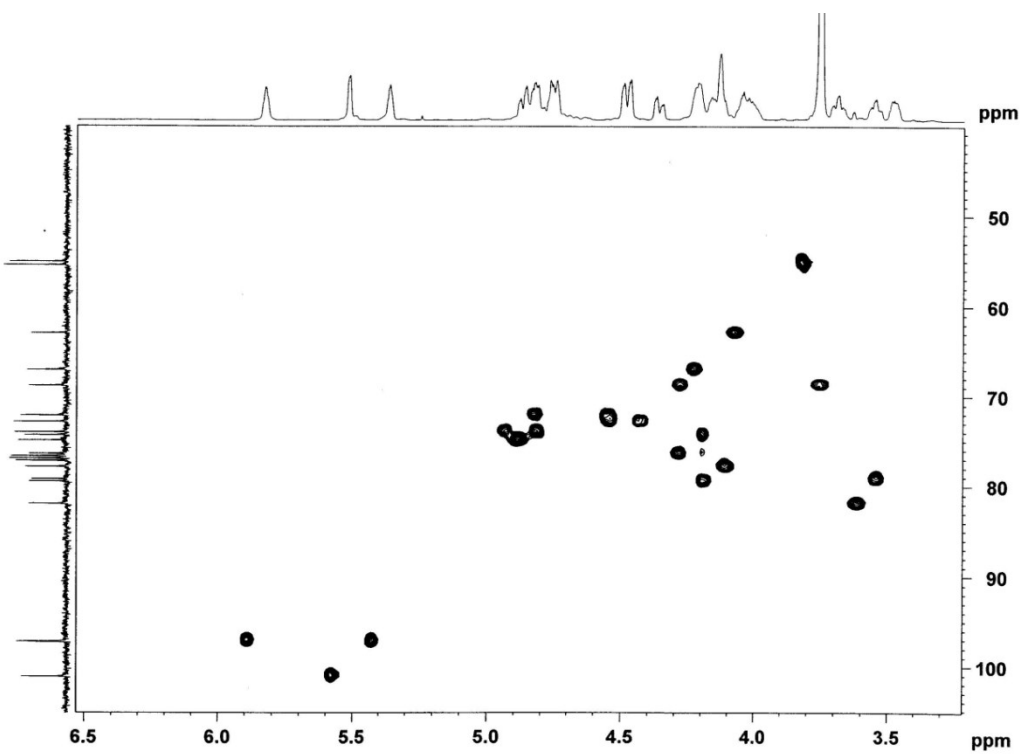

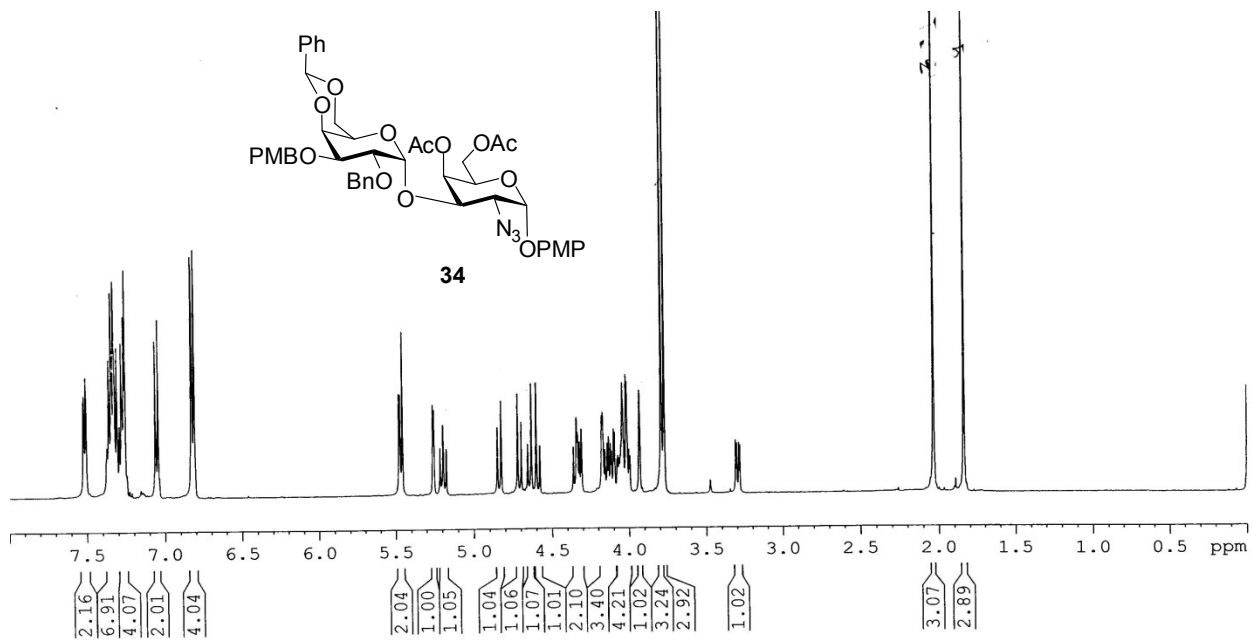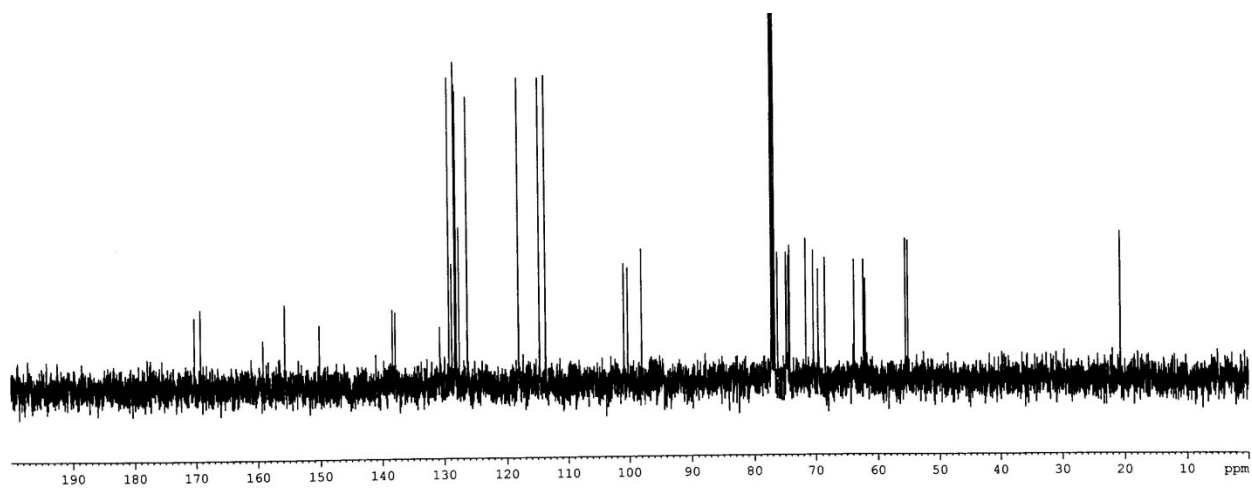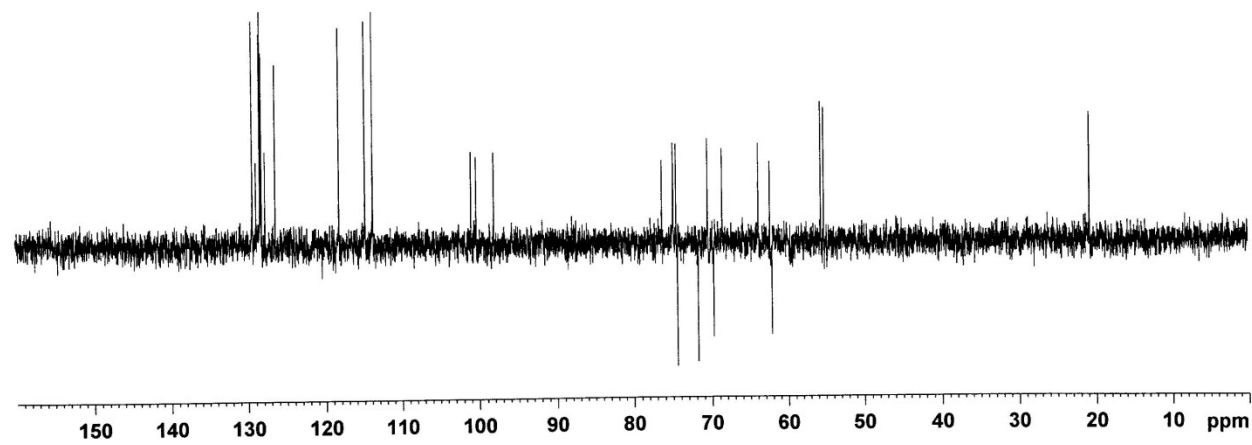

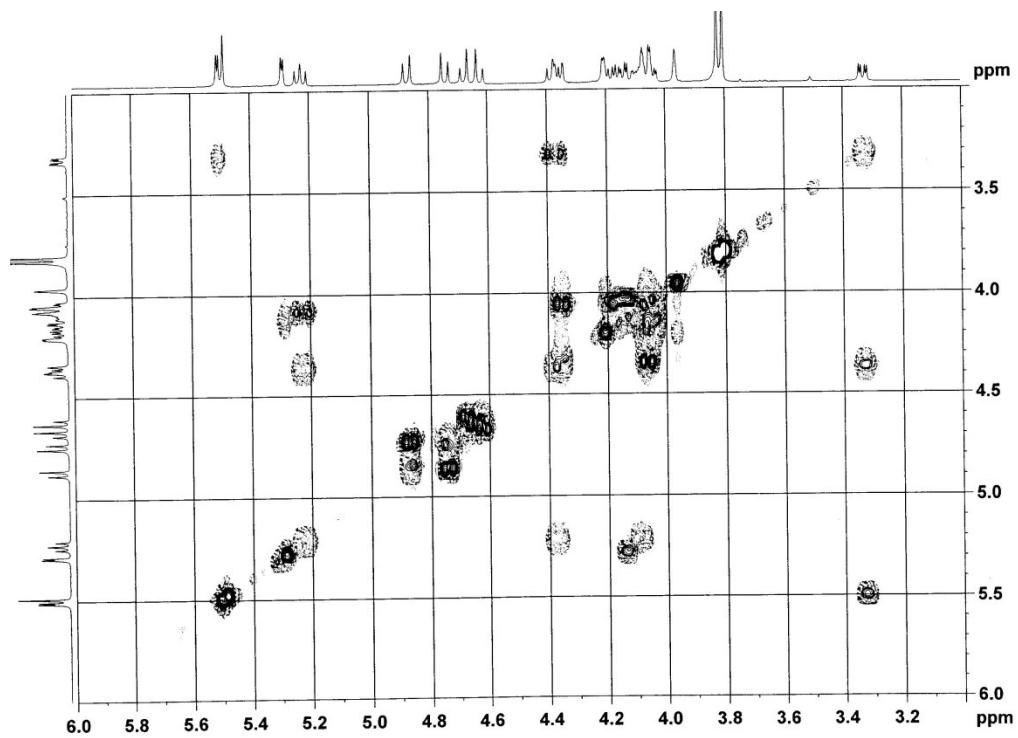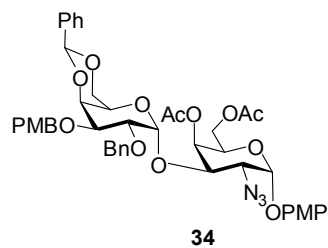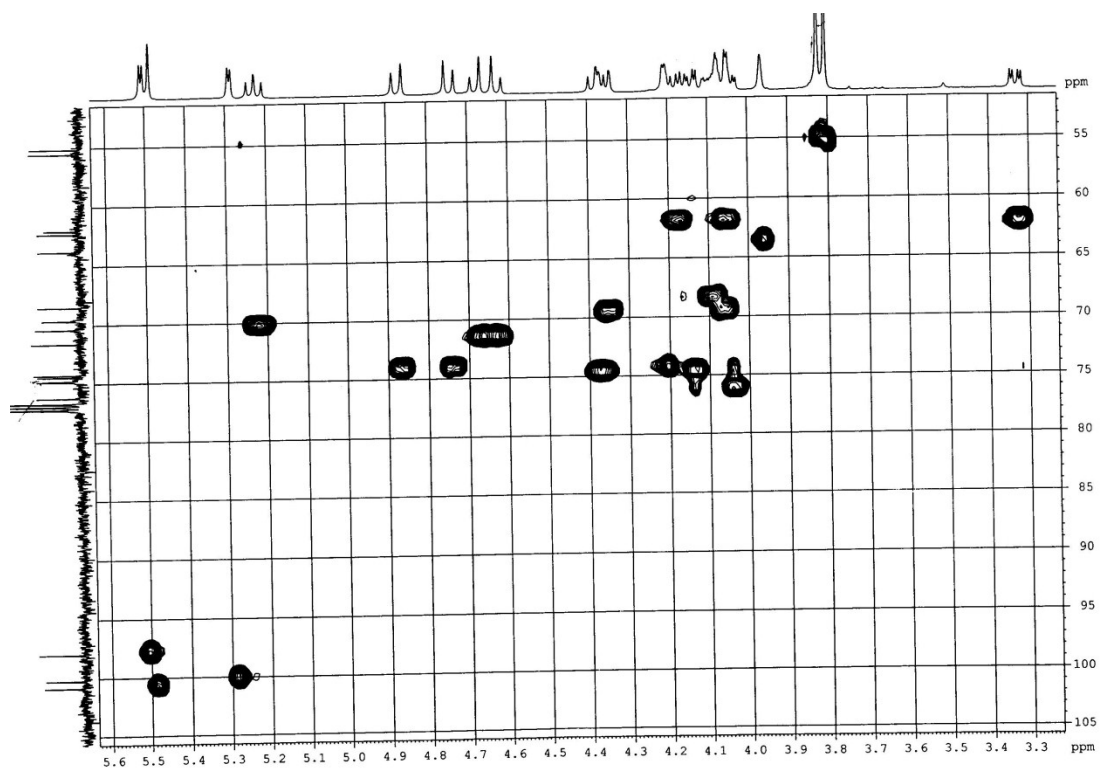

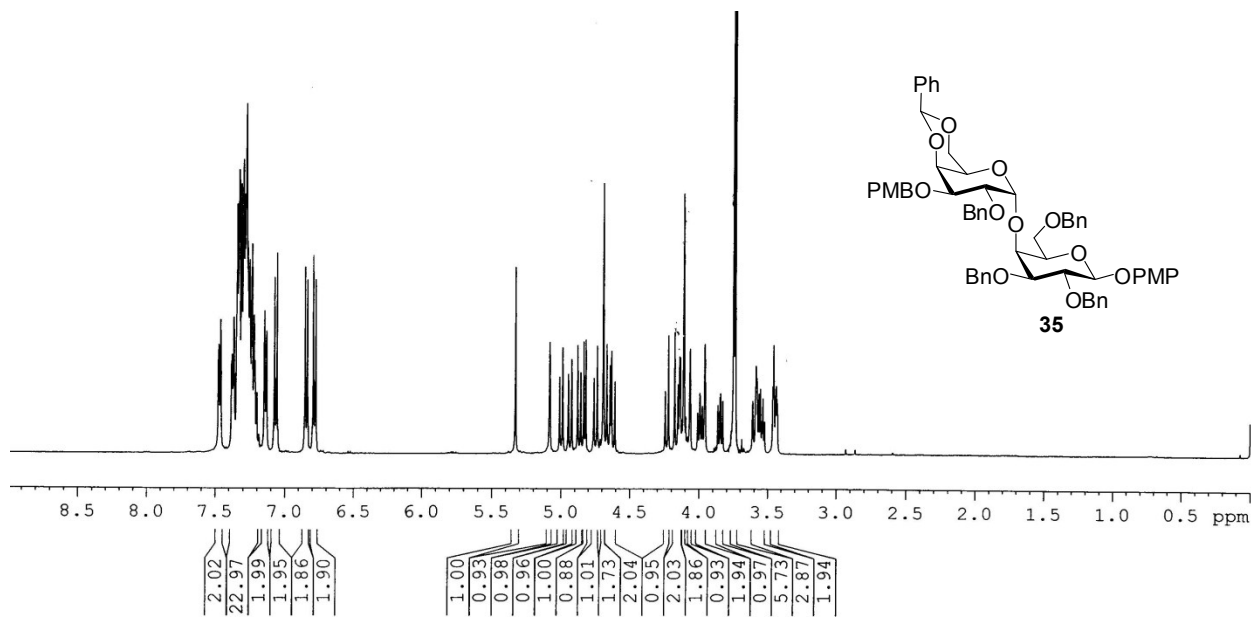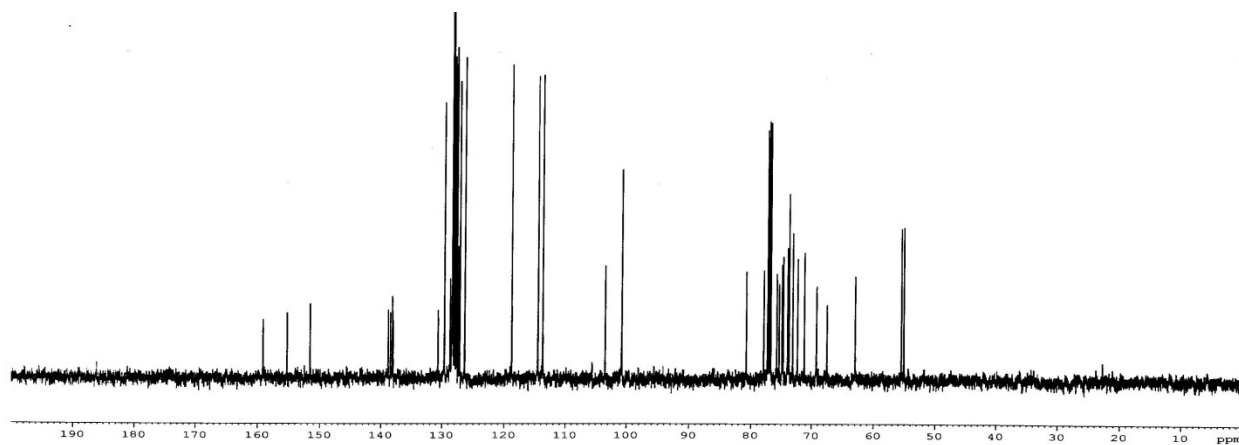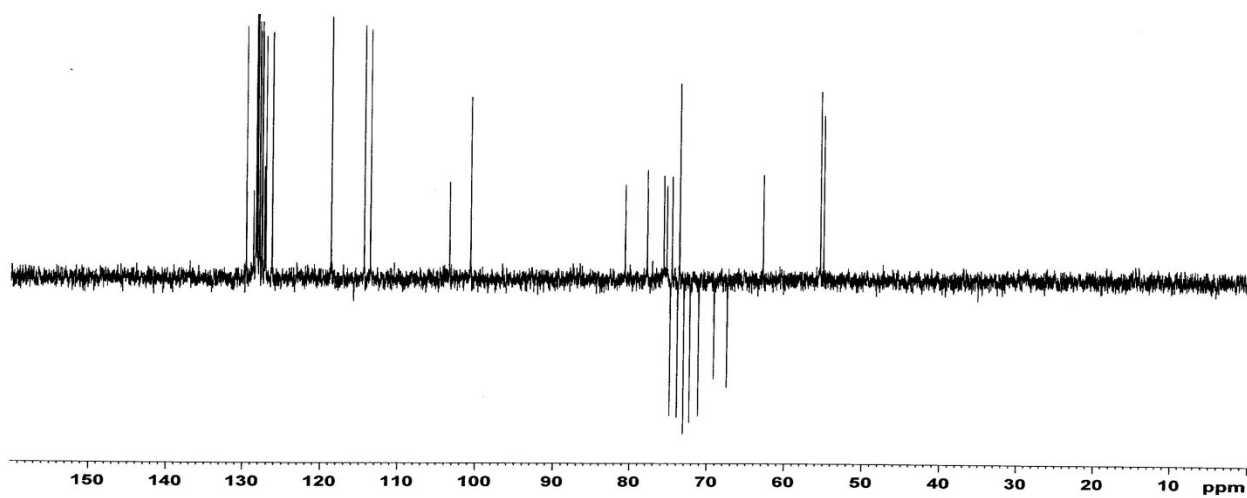



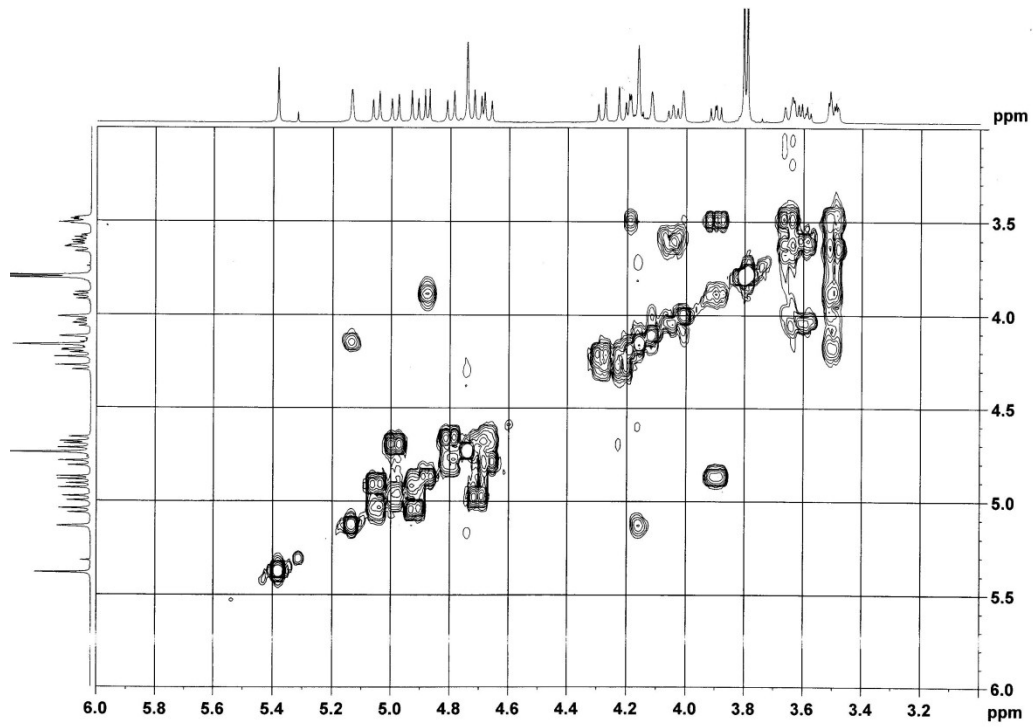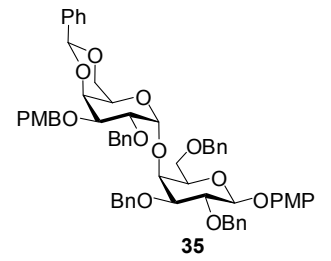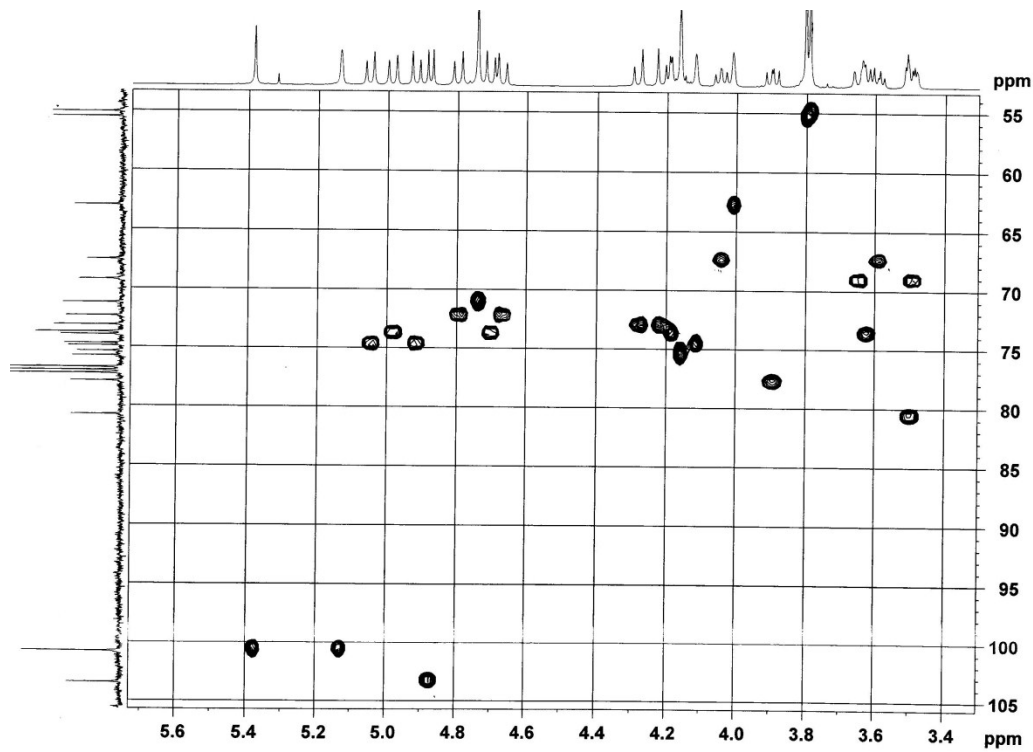

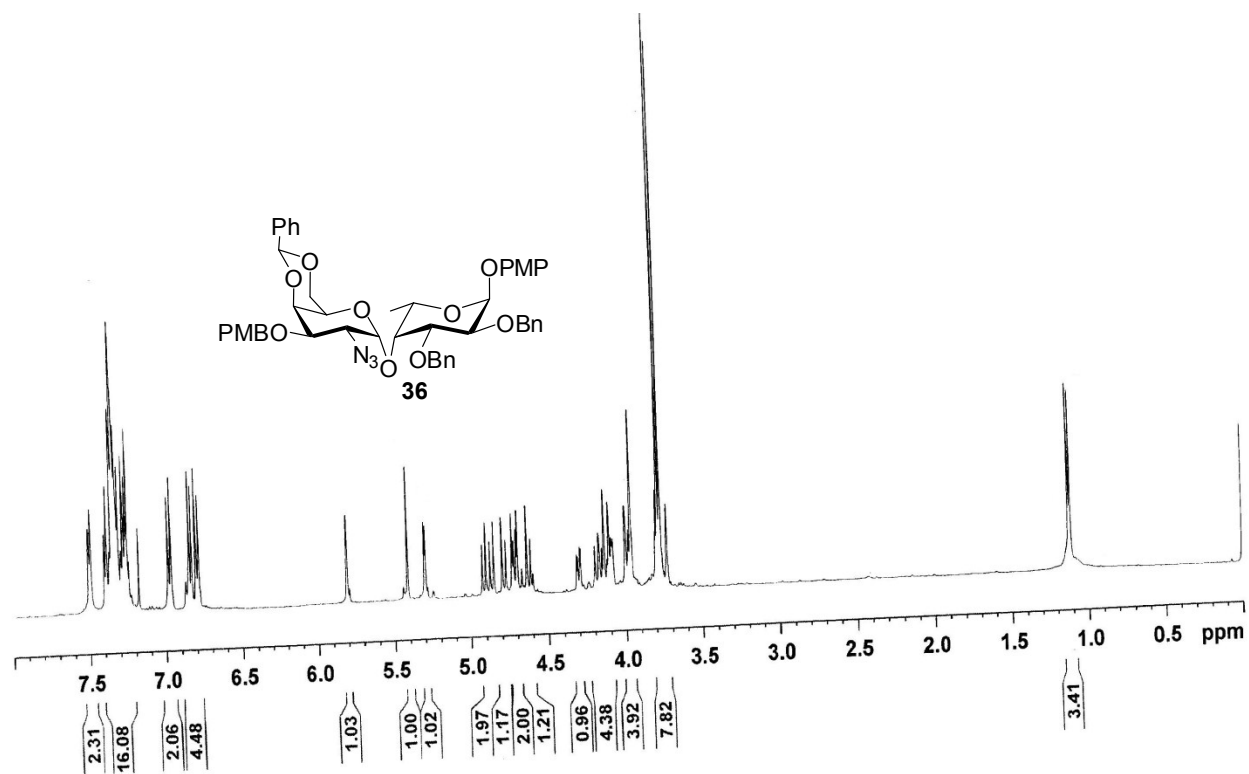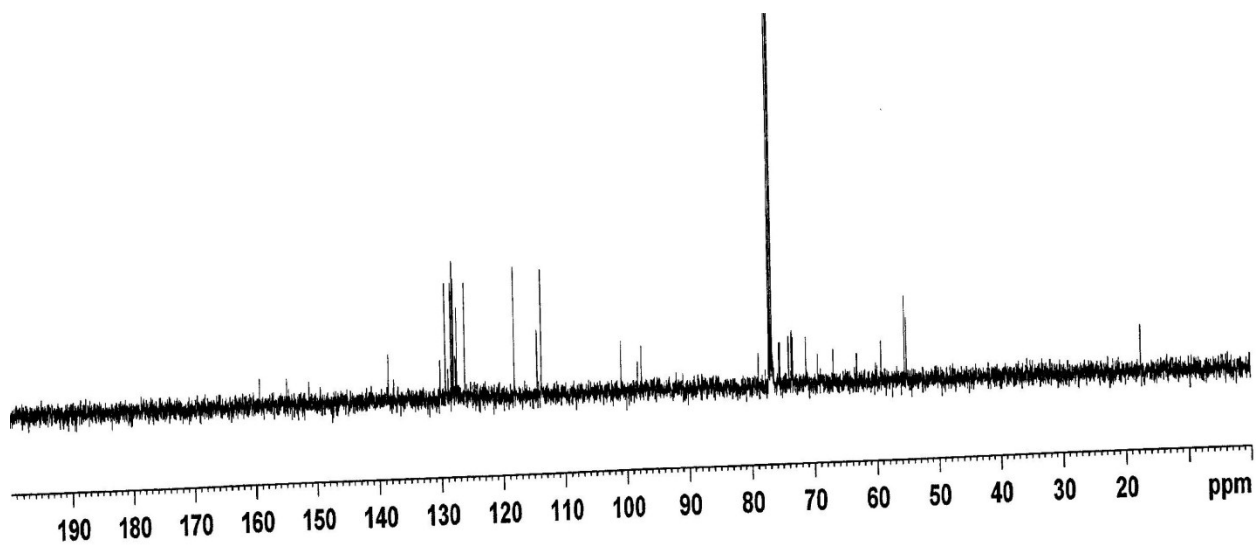

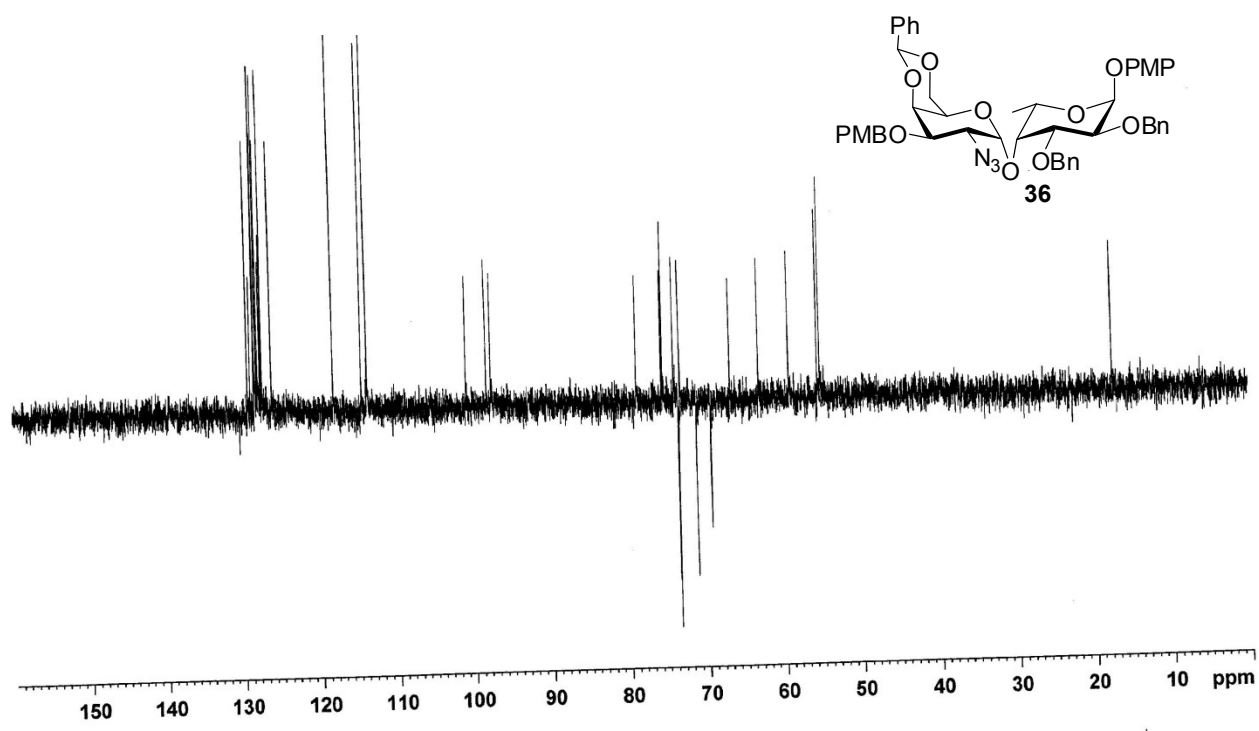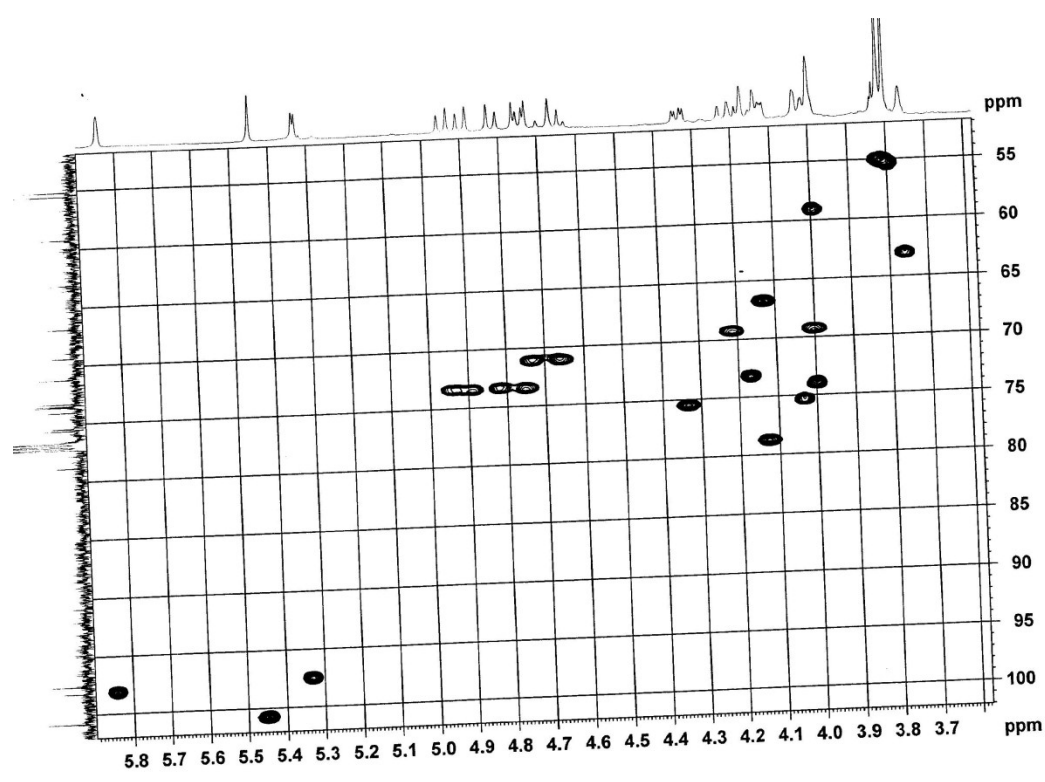

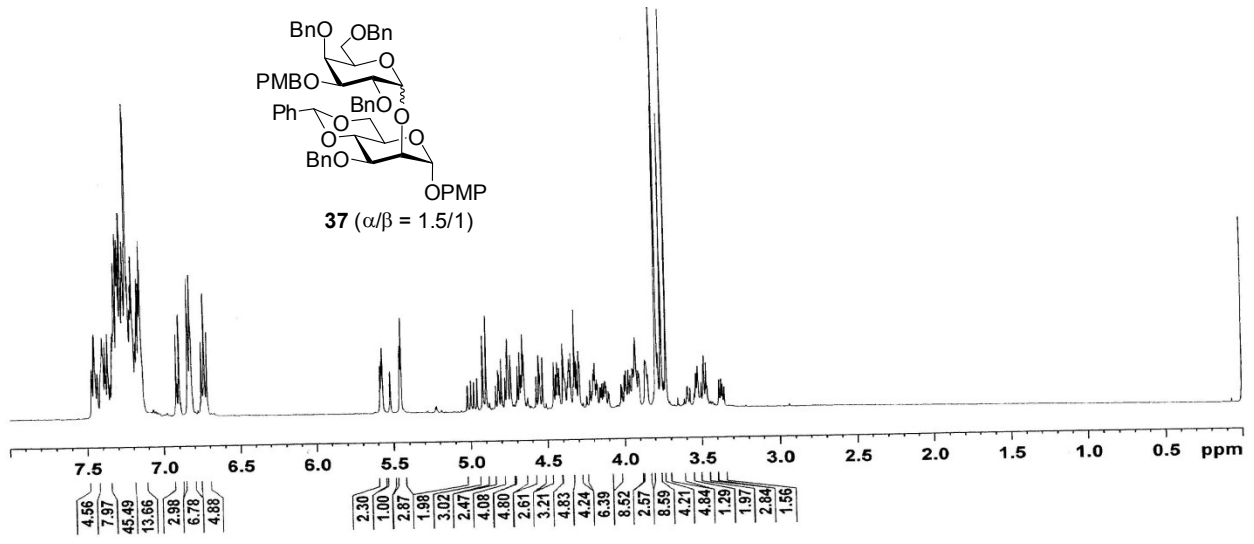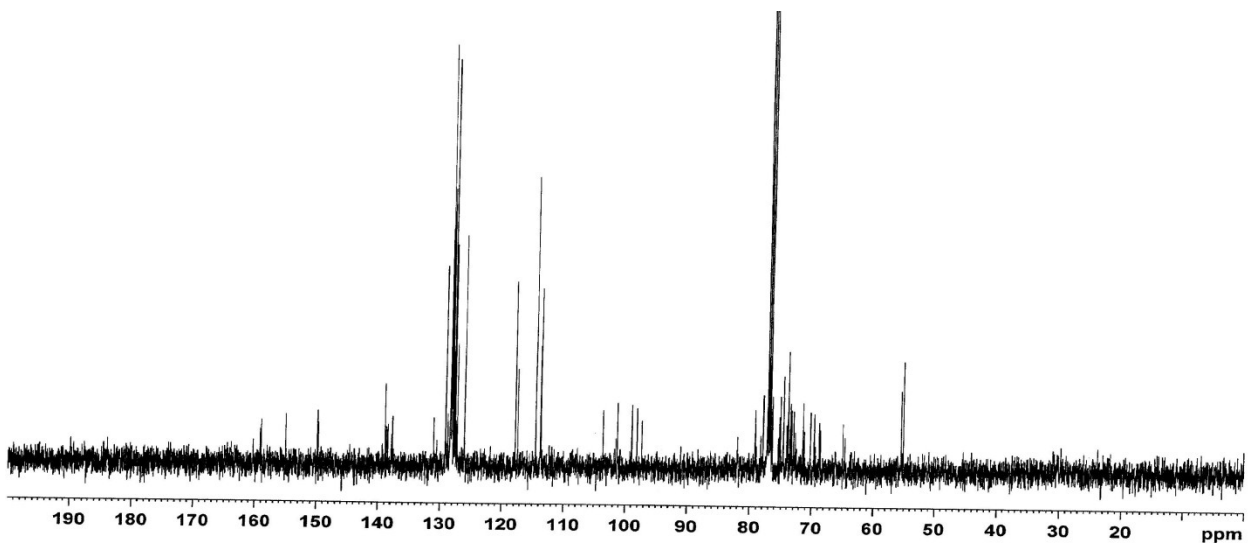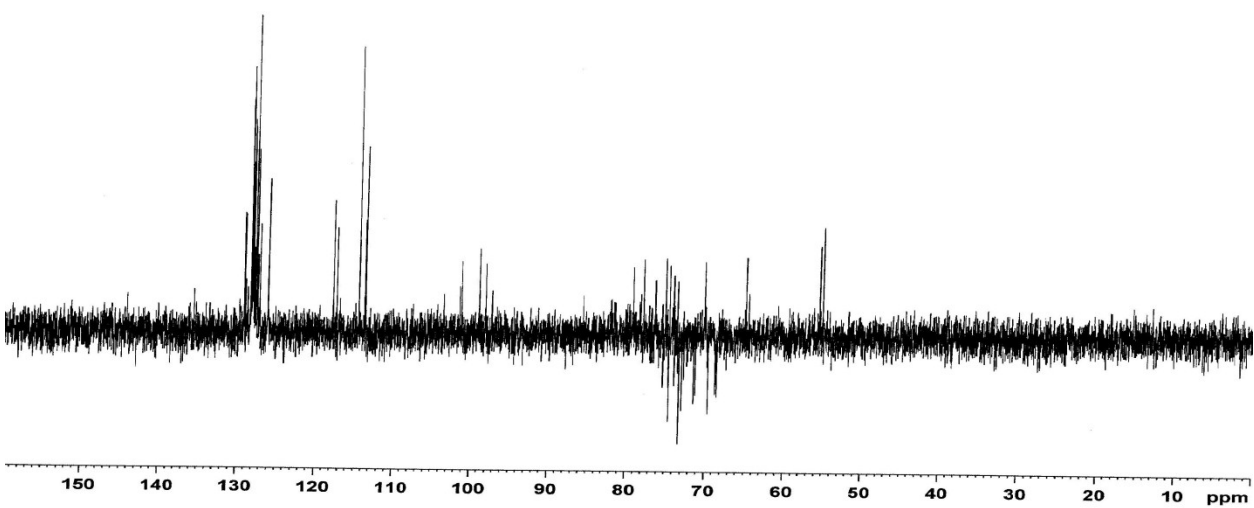

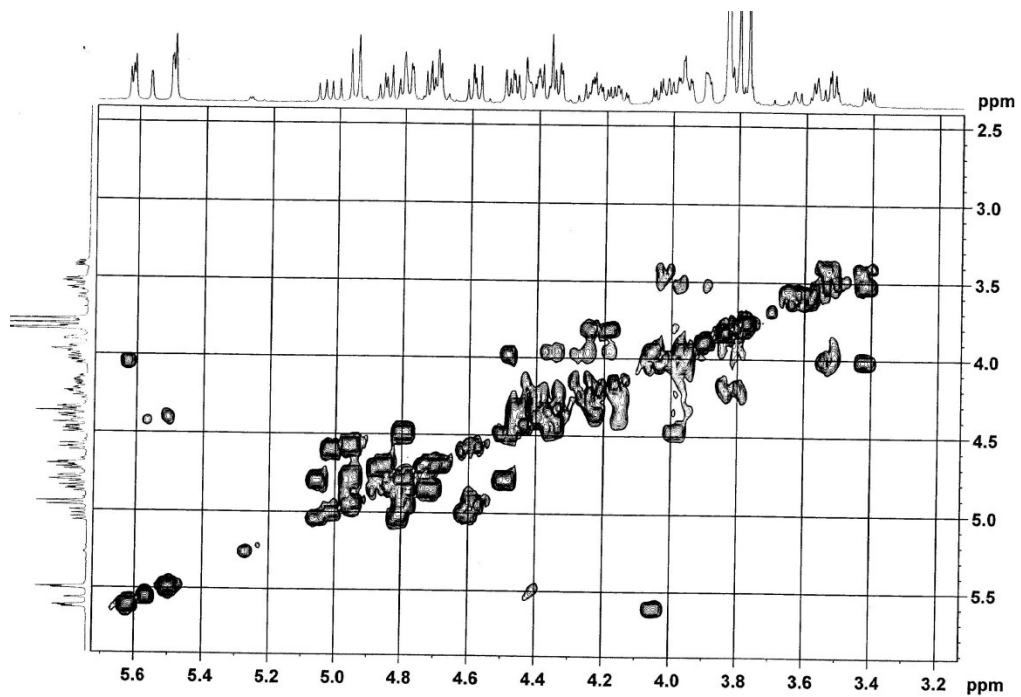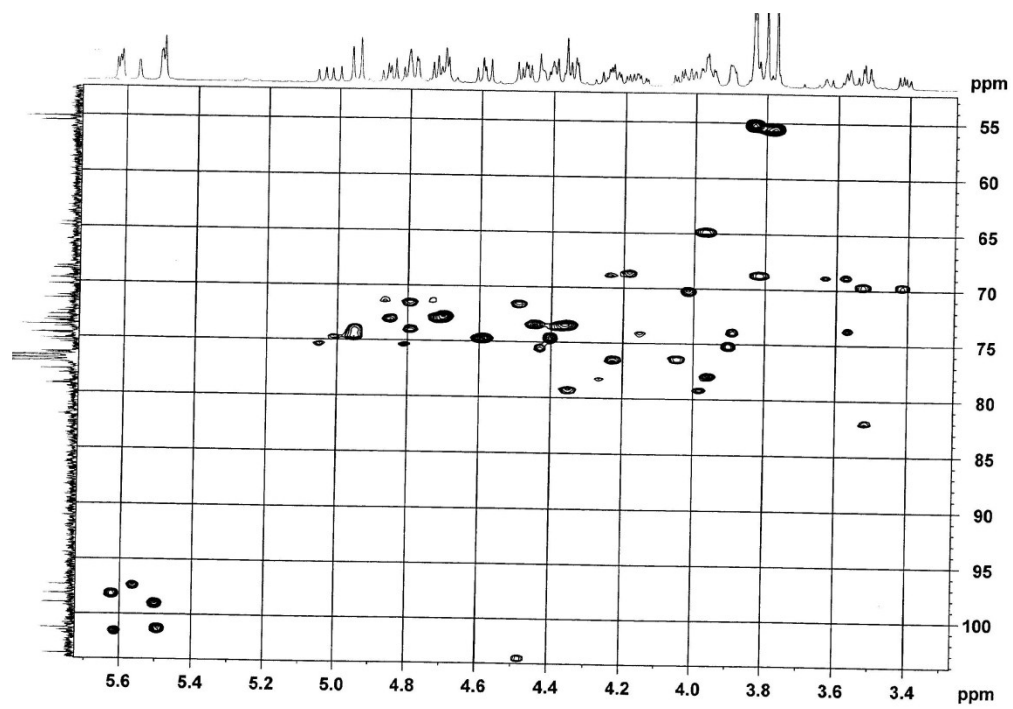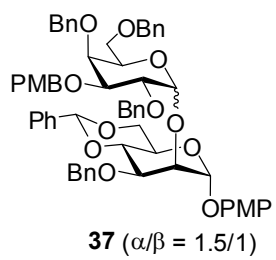

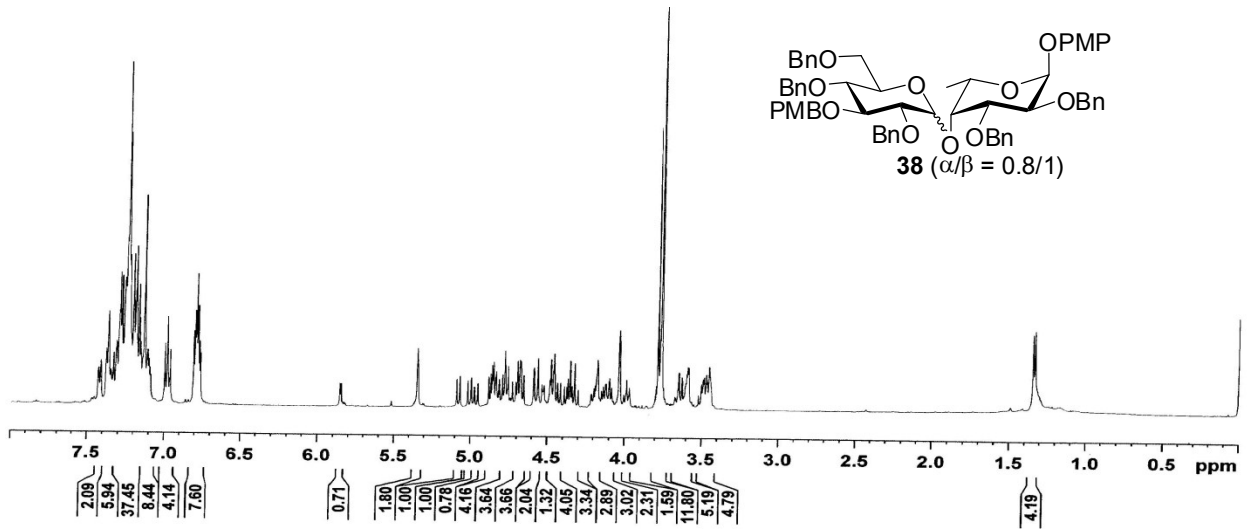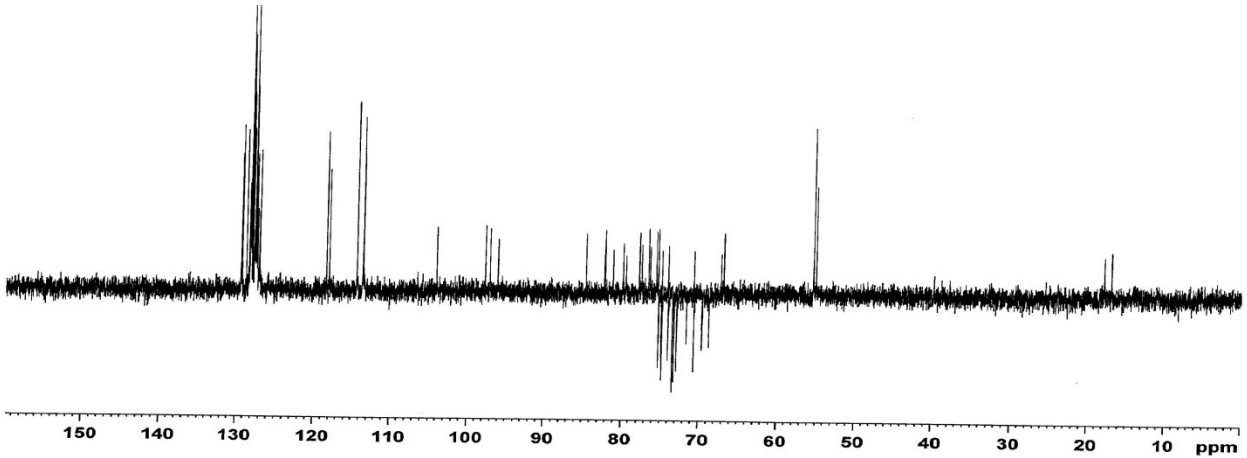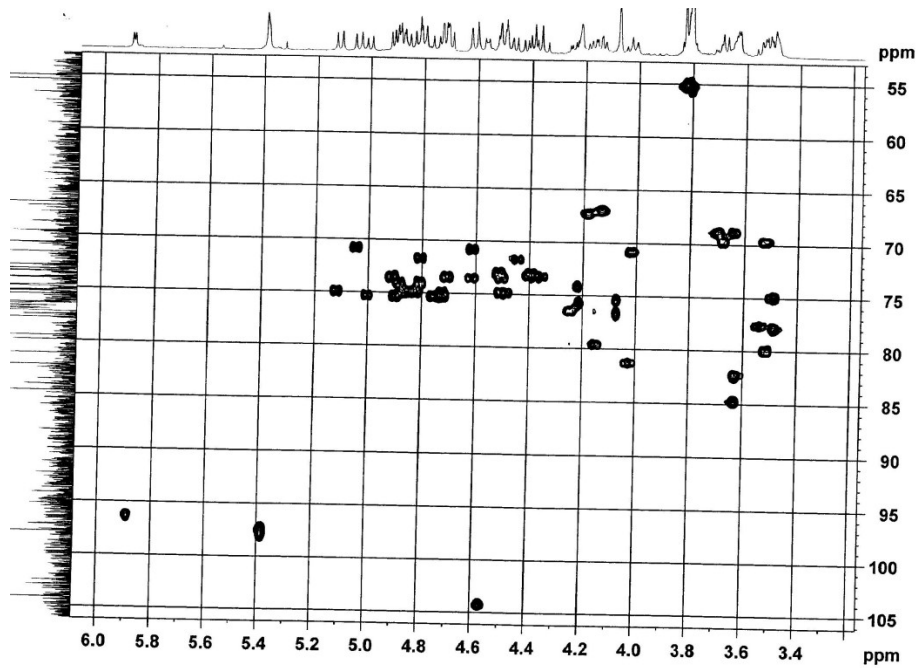

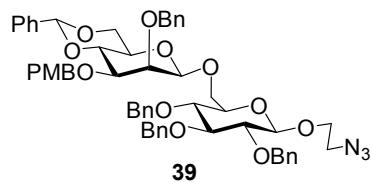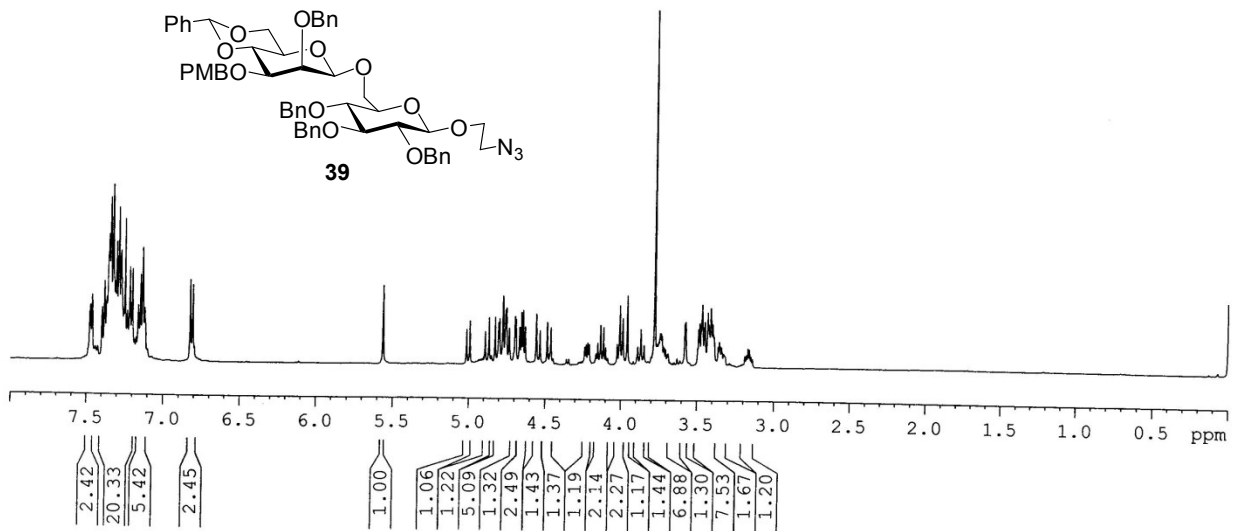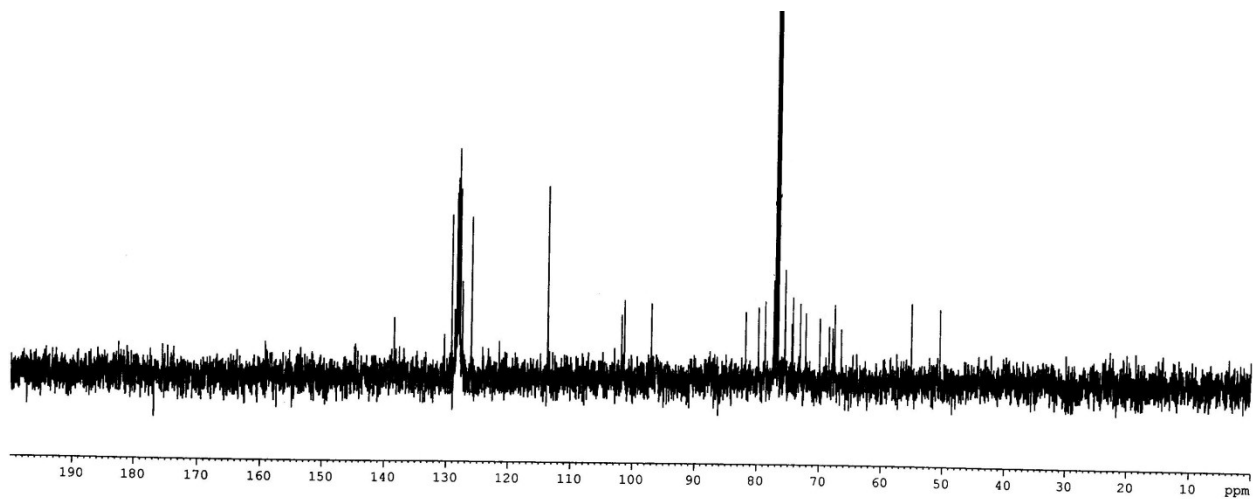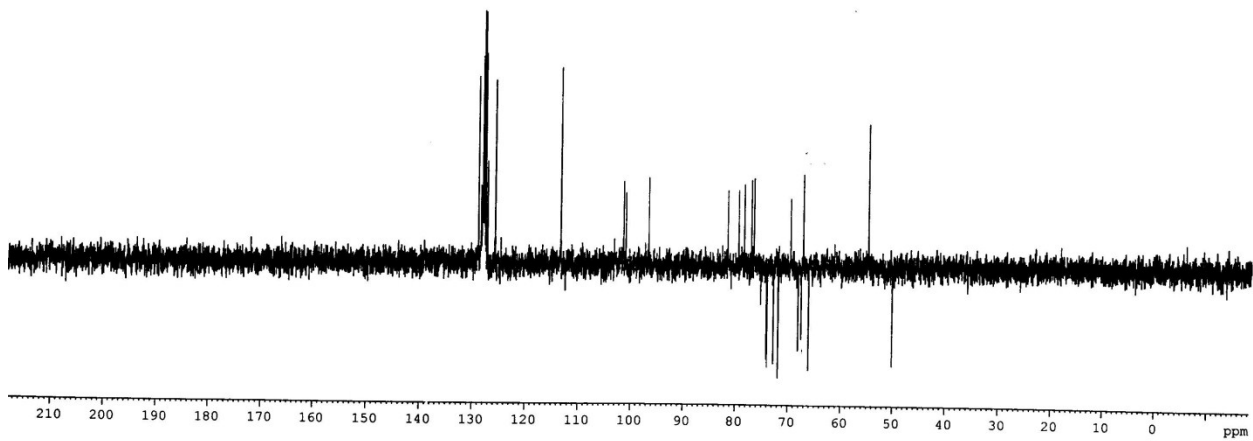

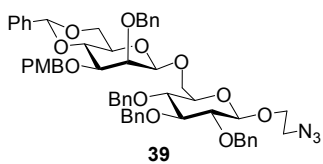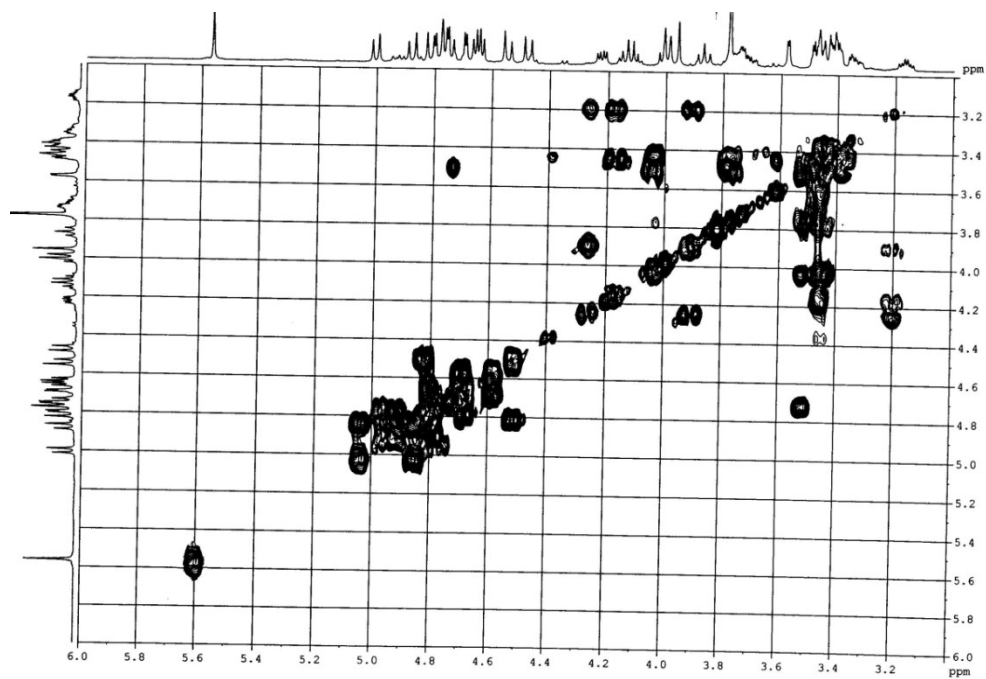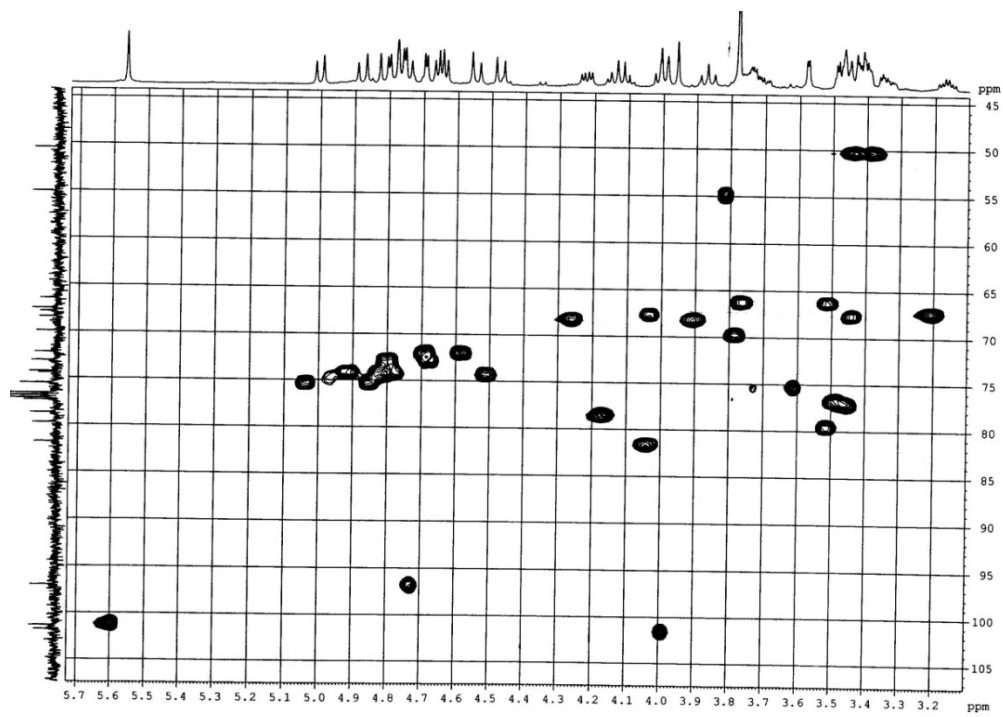



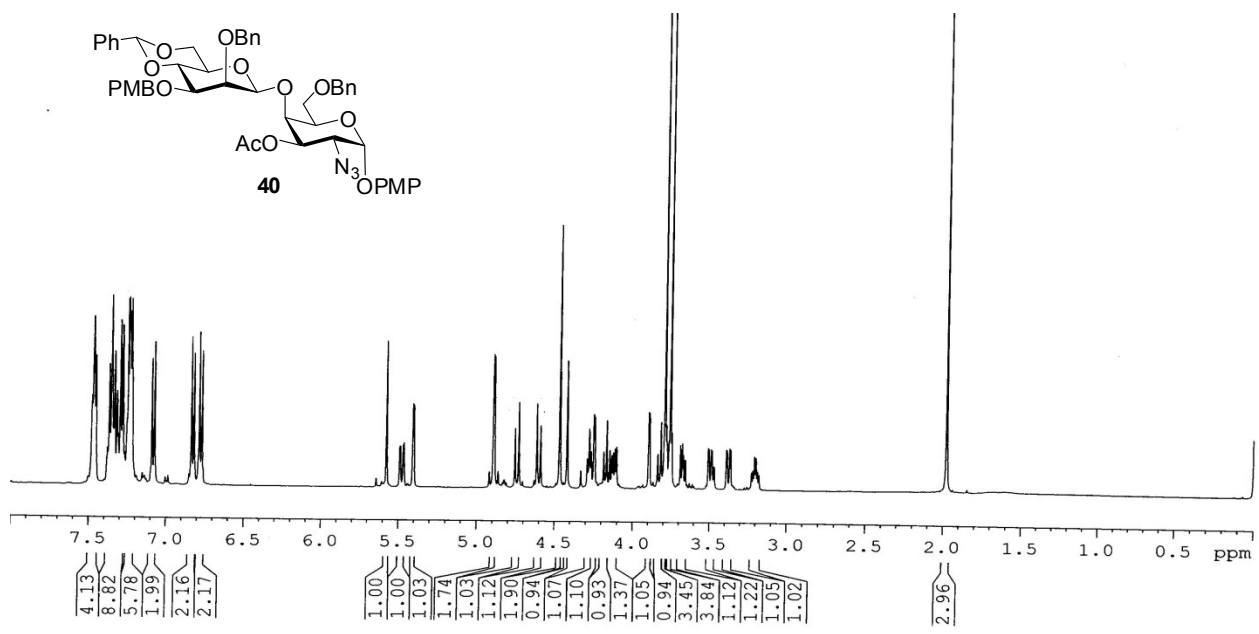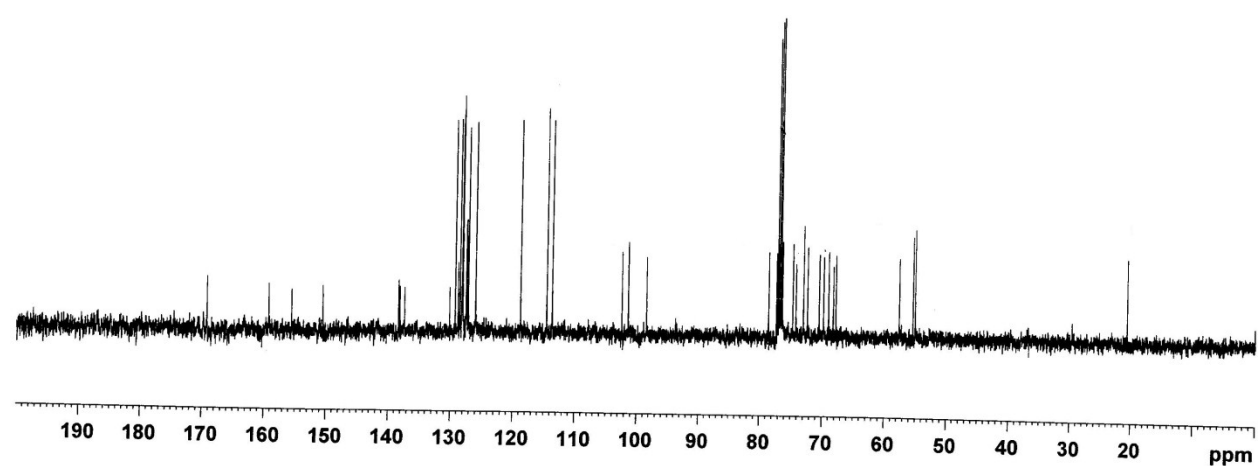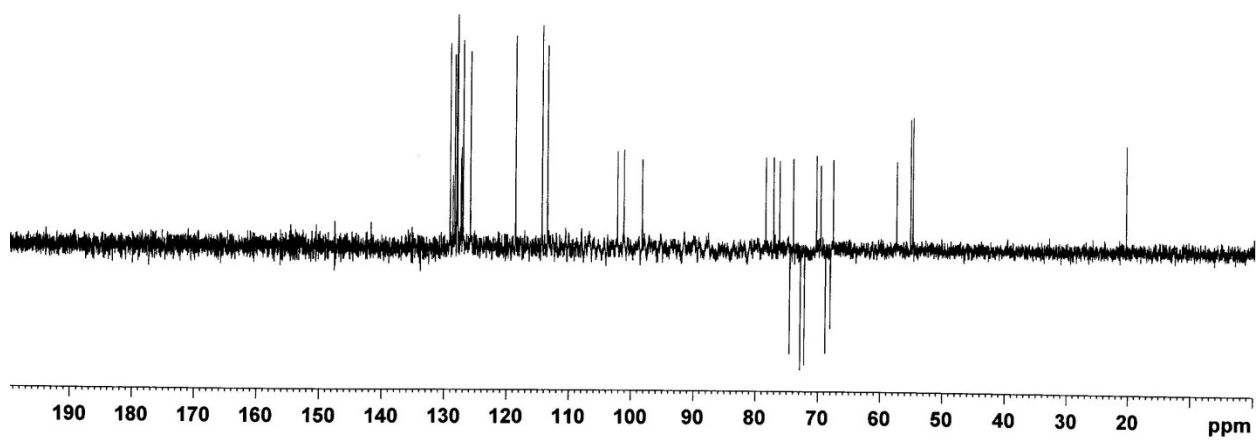

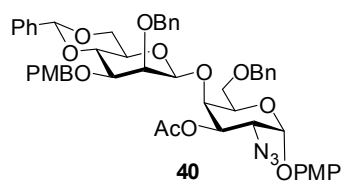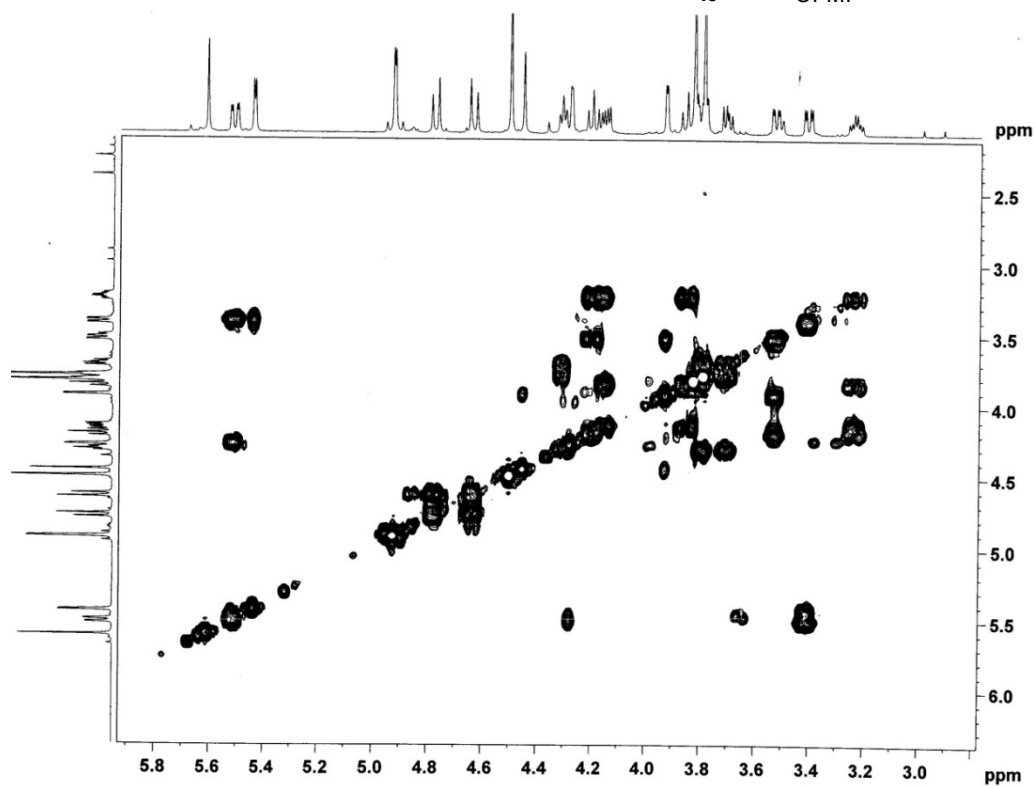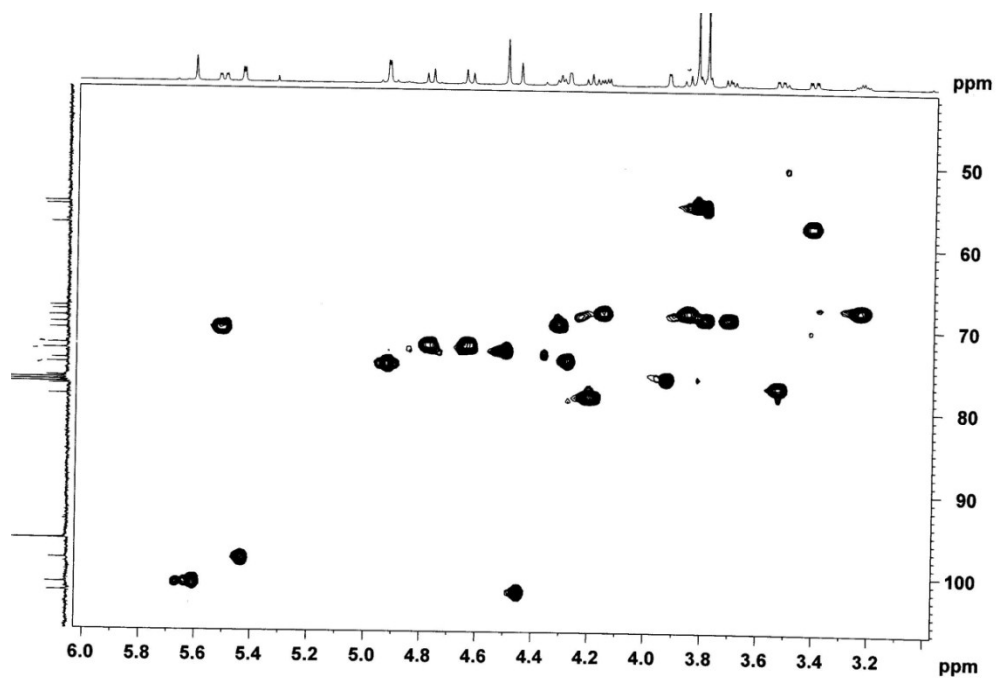

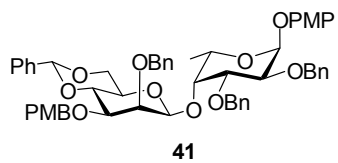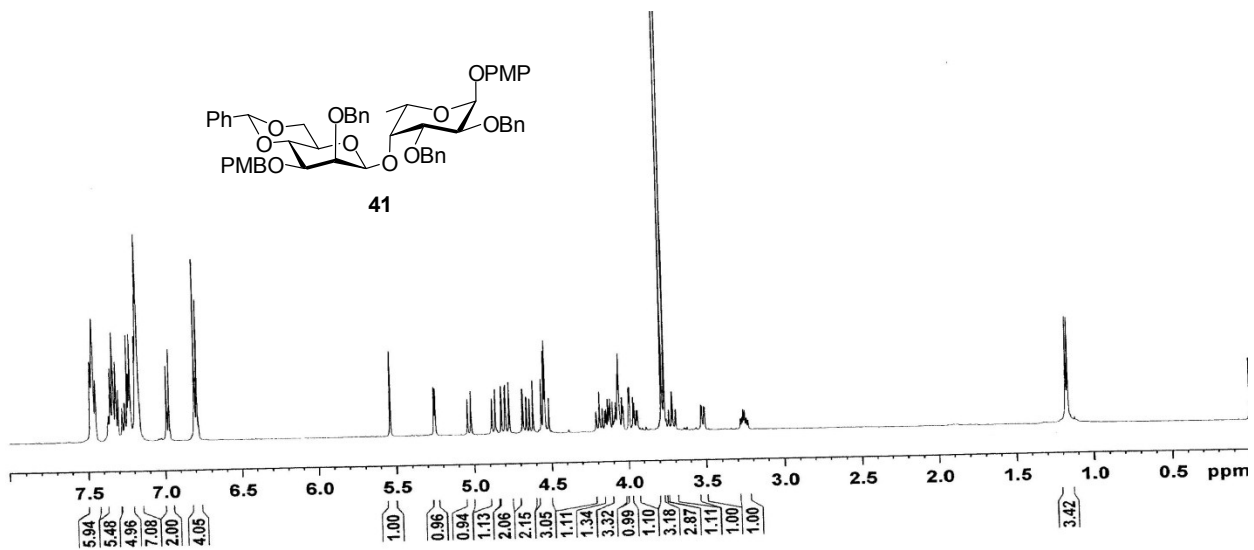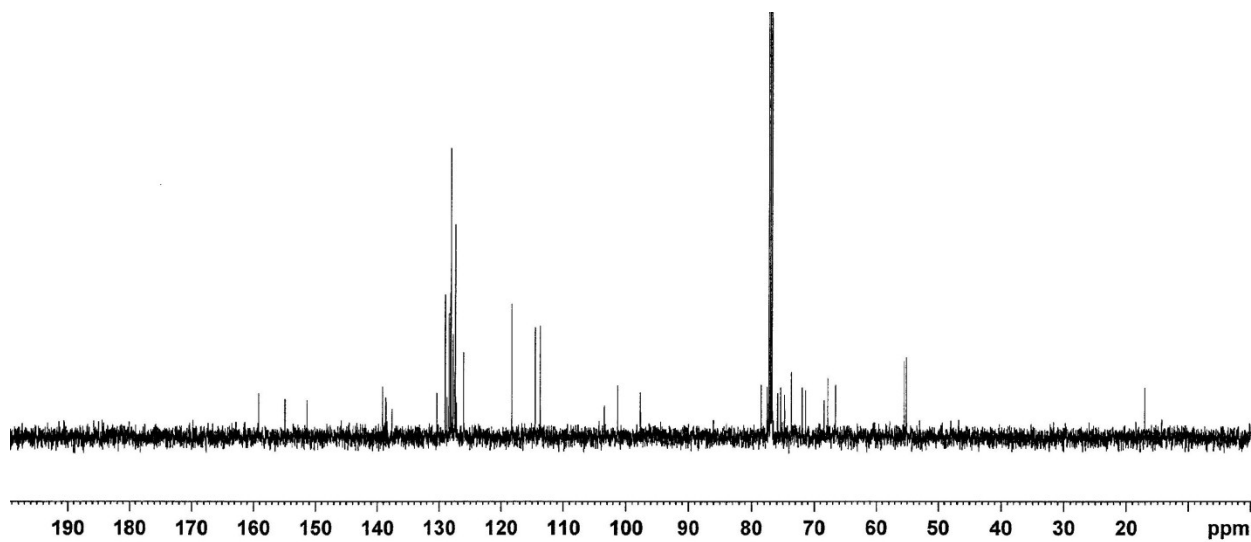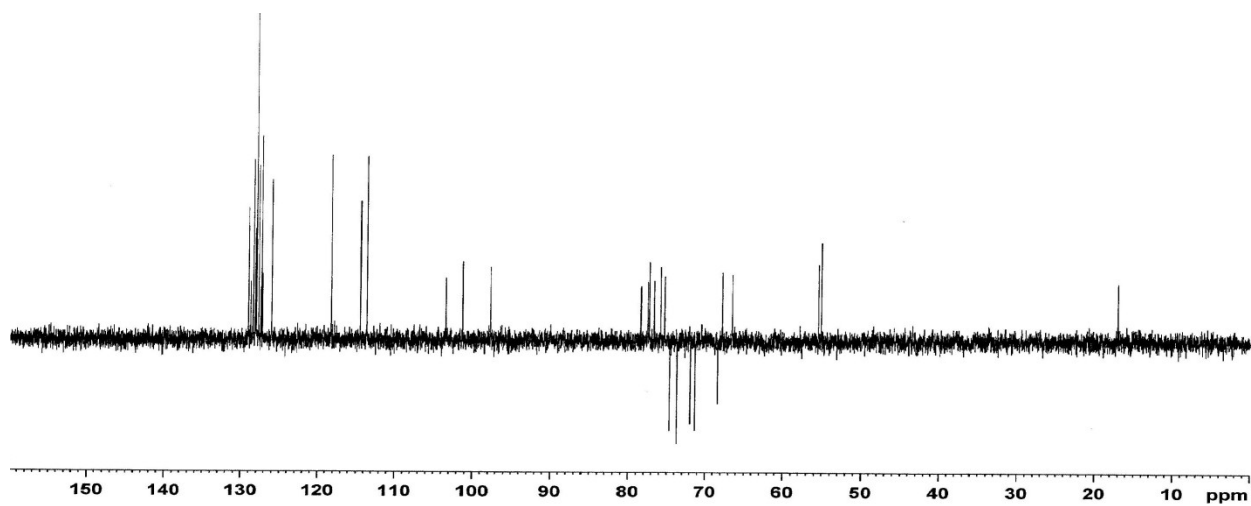

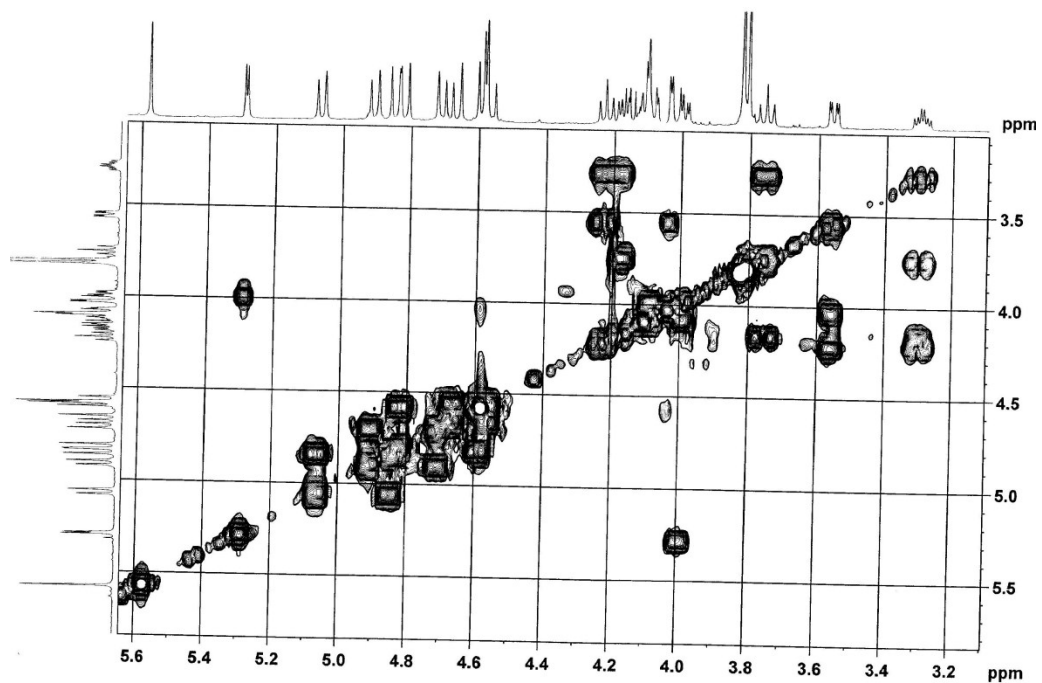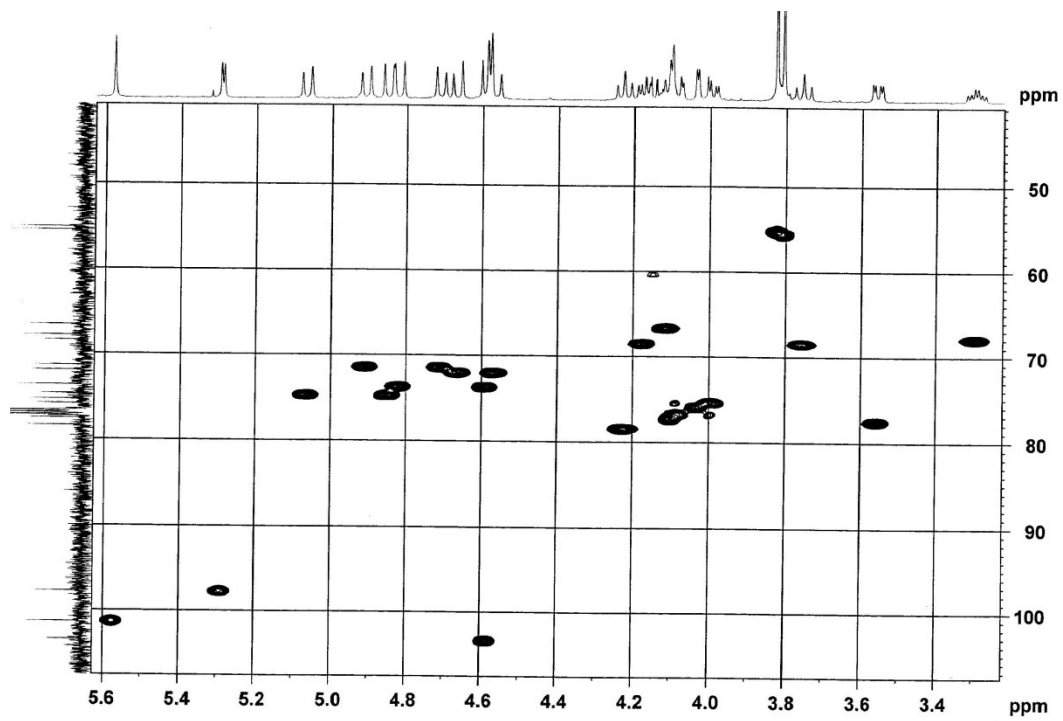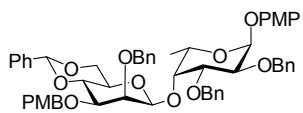

41



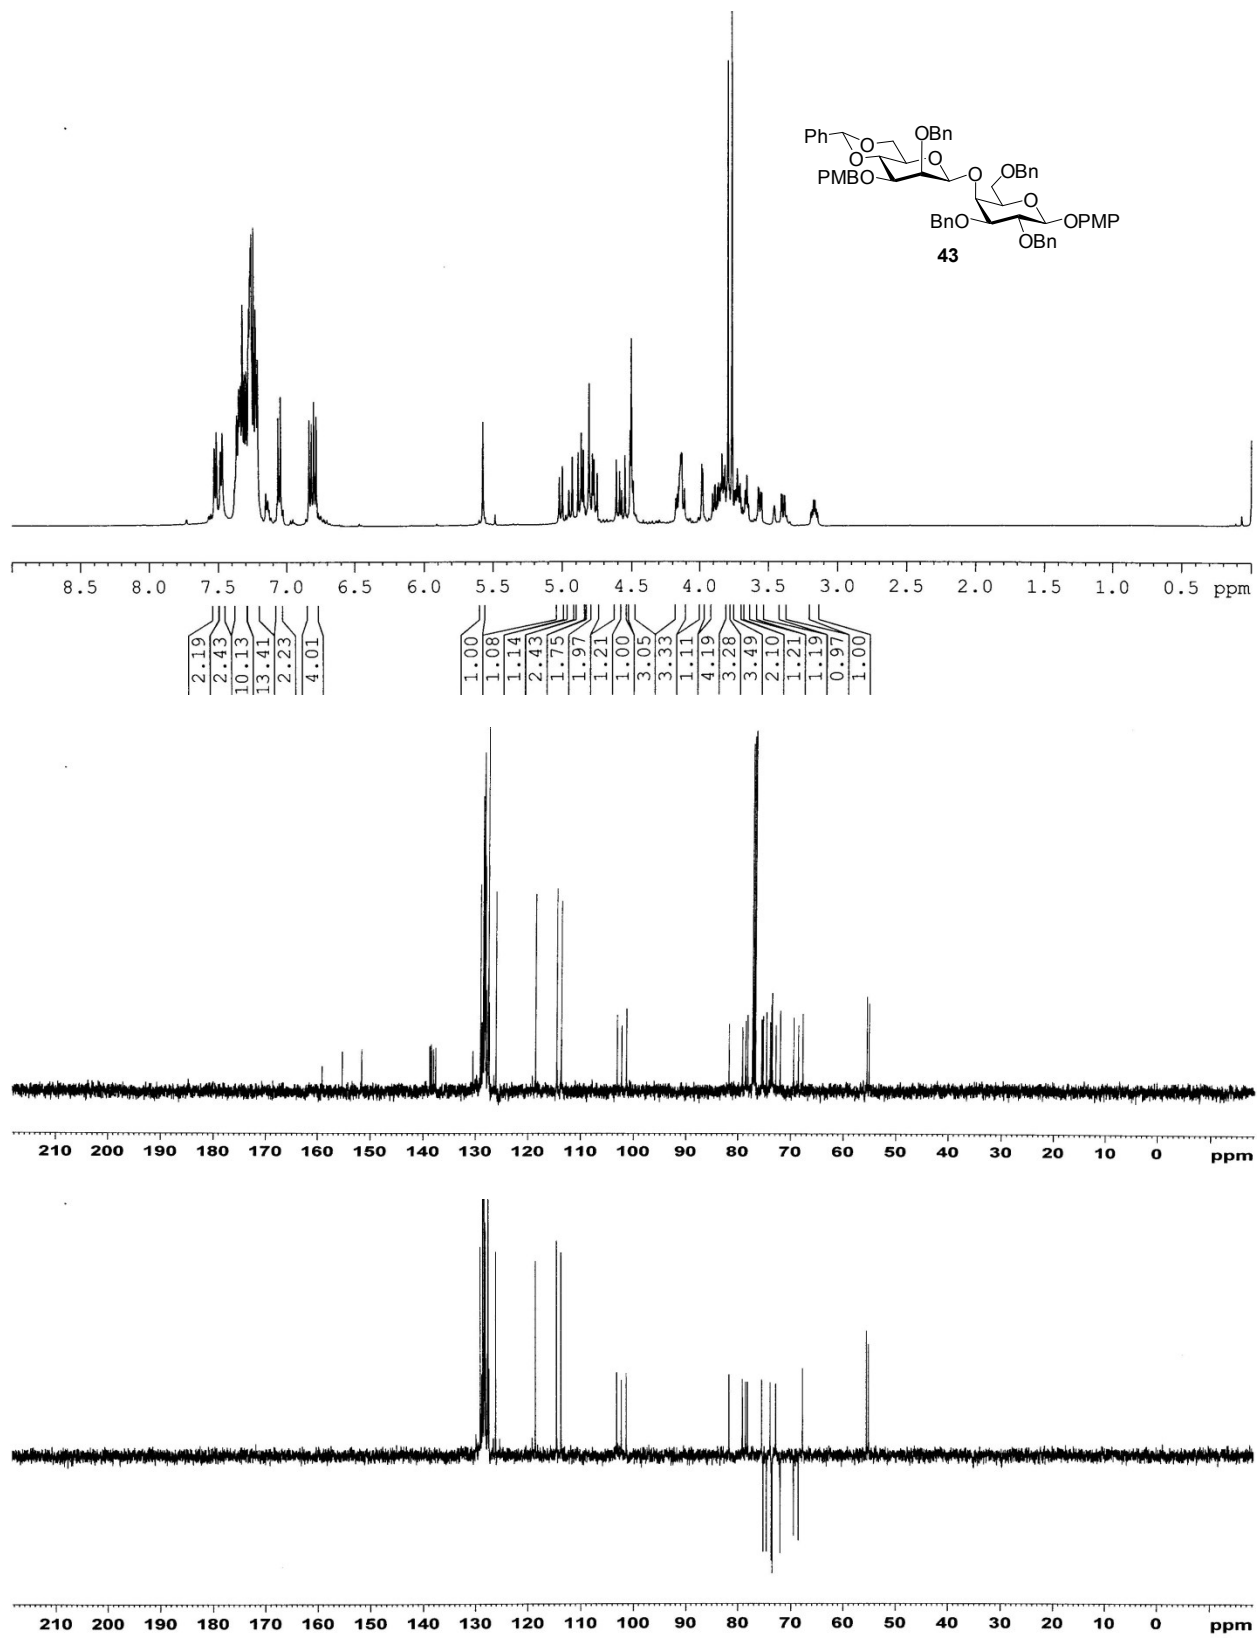

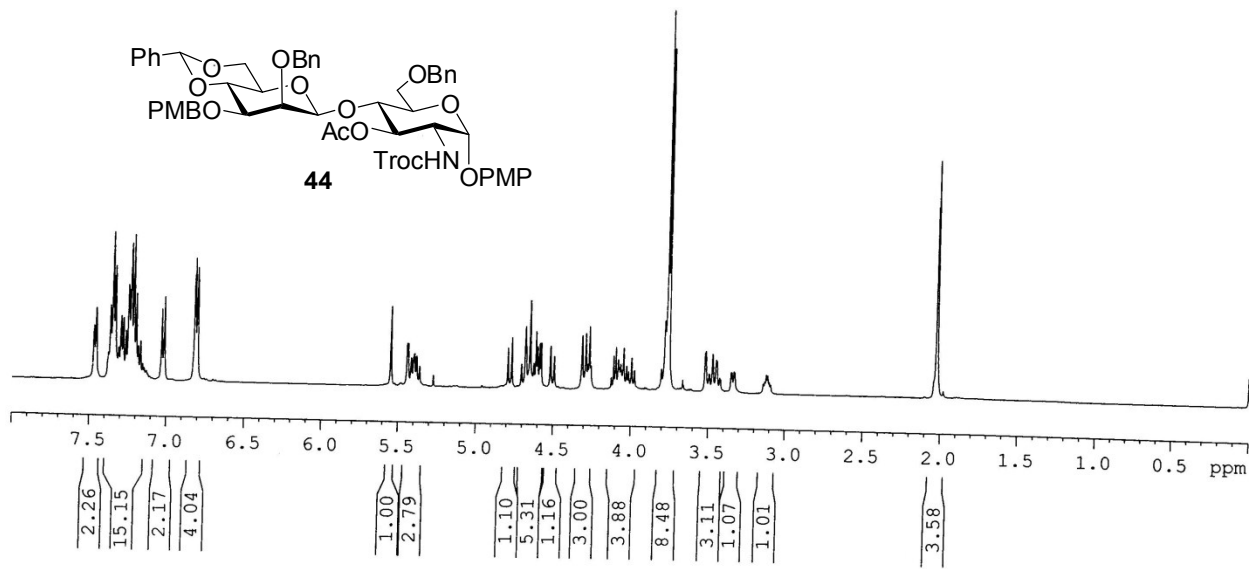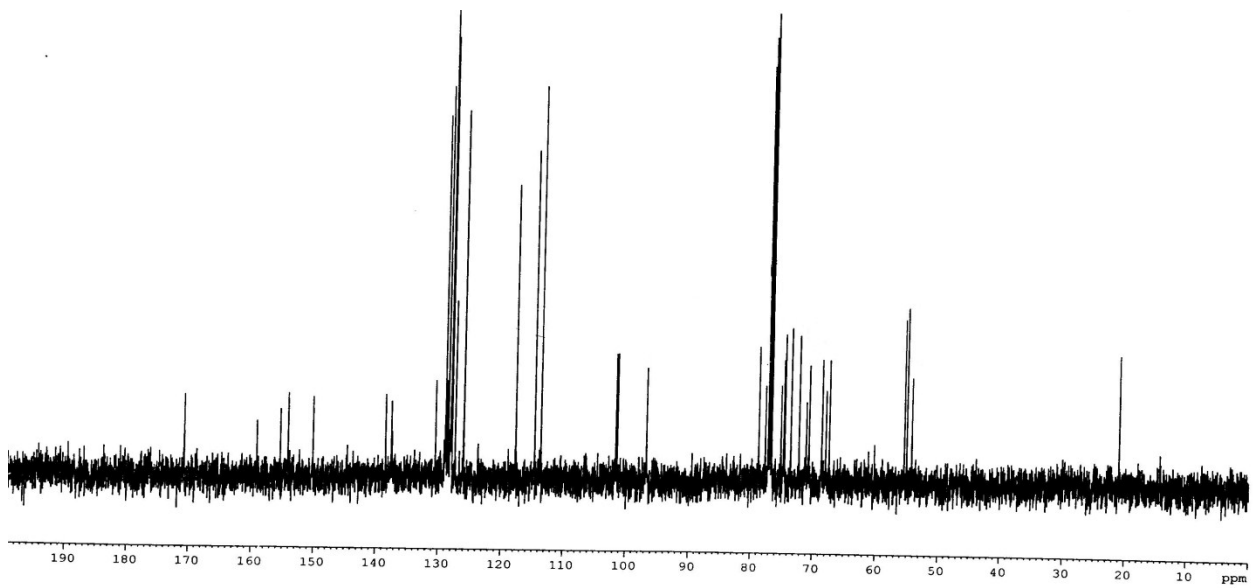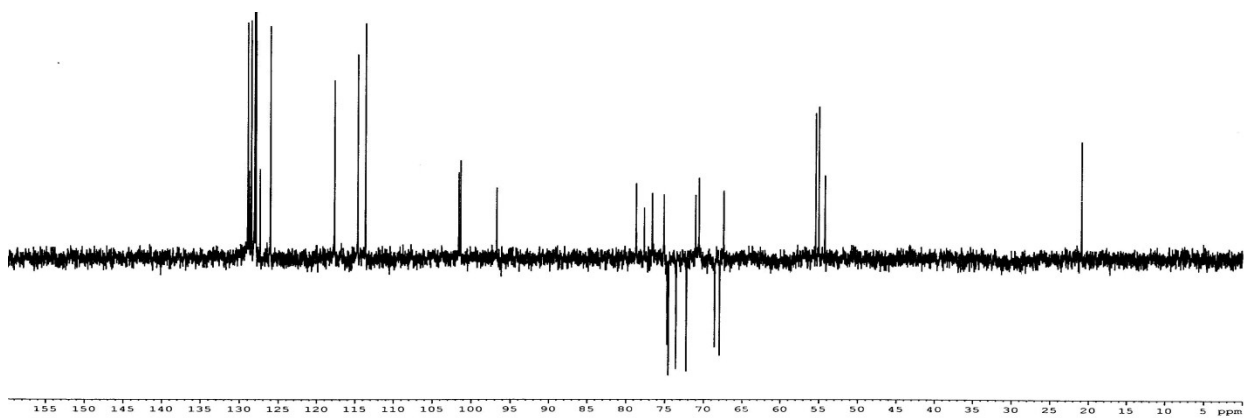

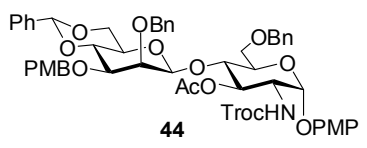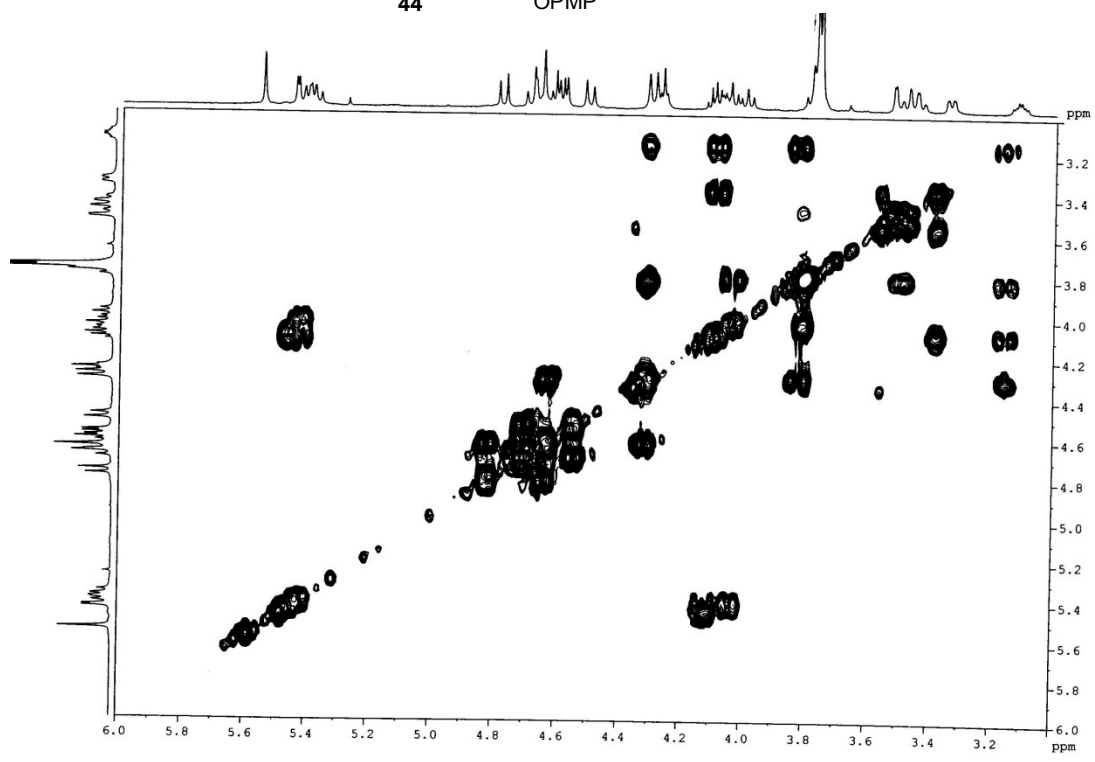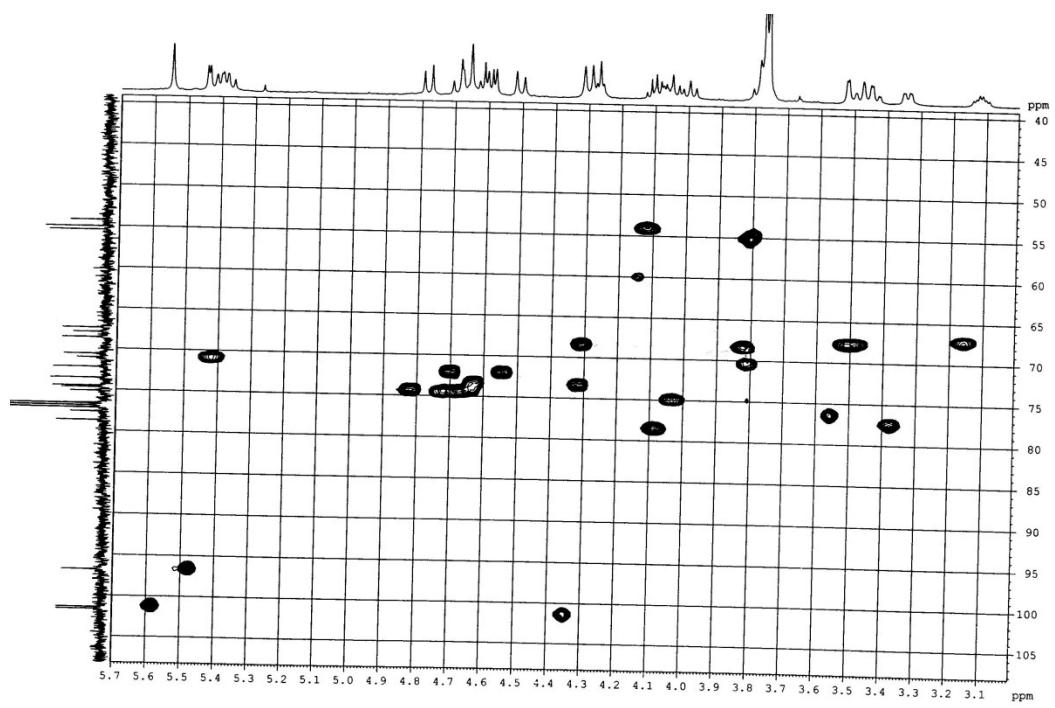



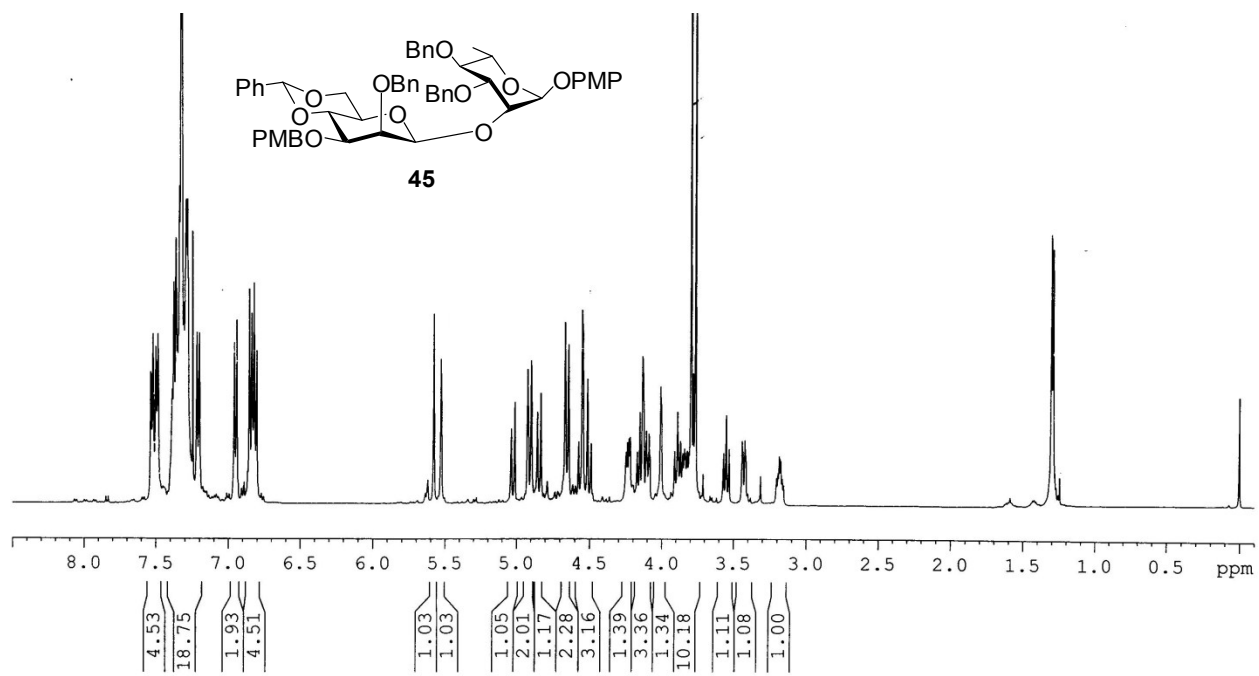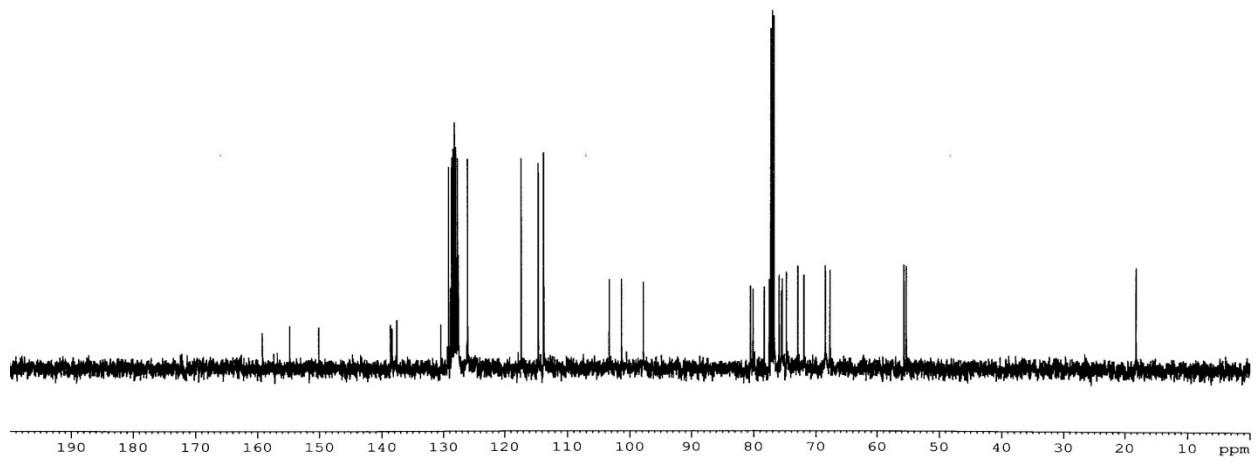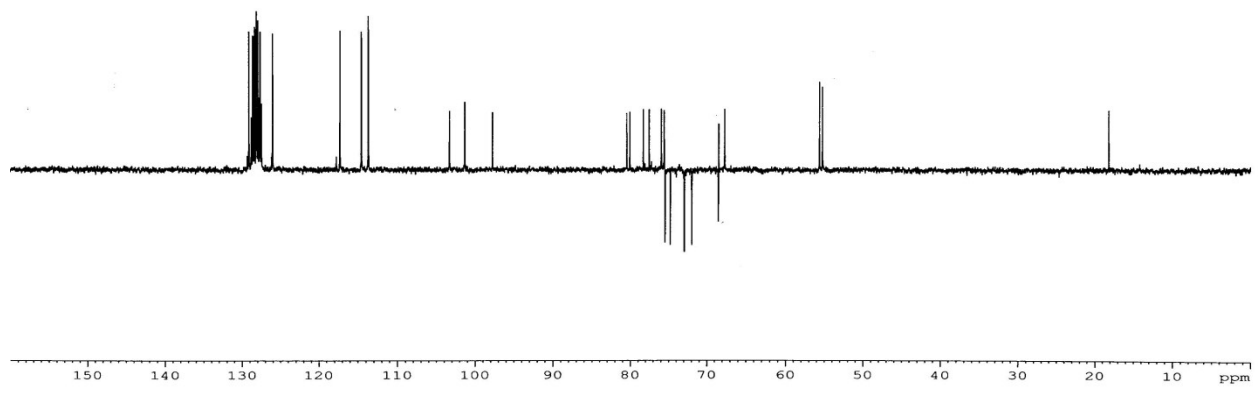

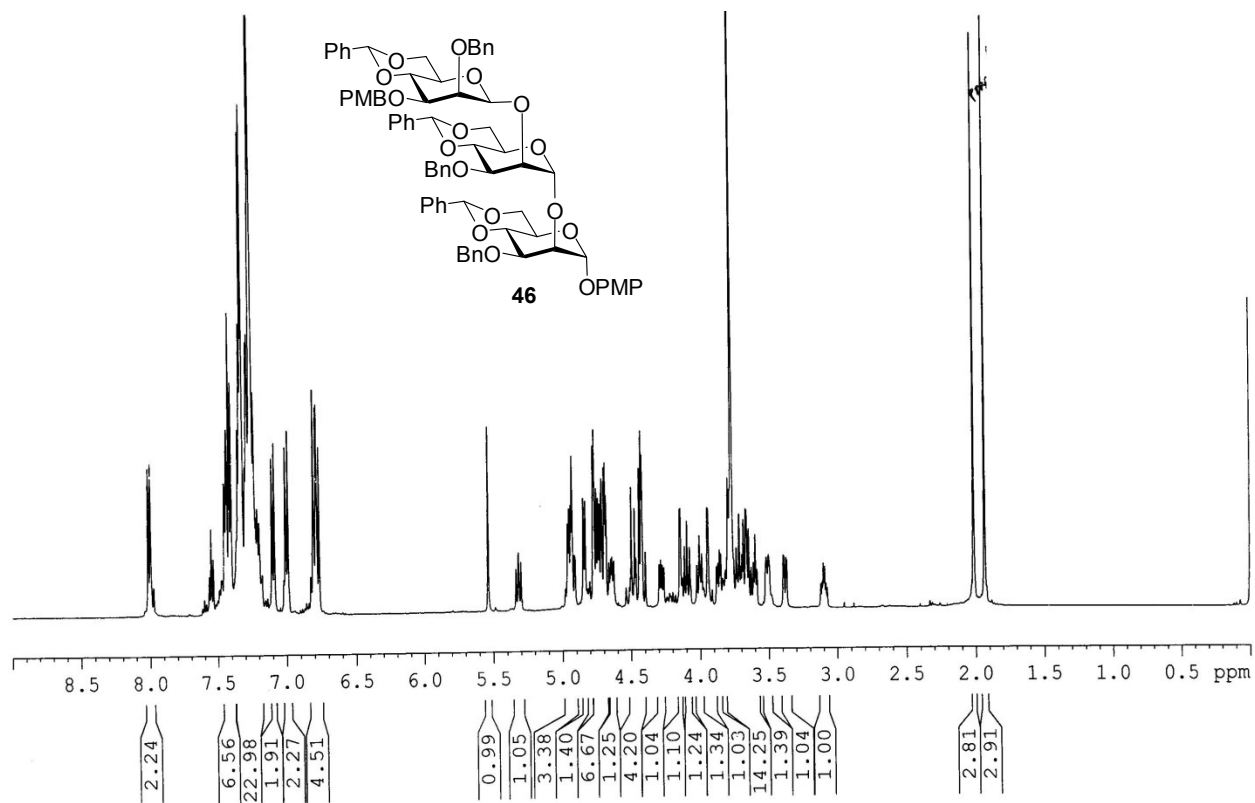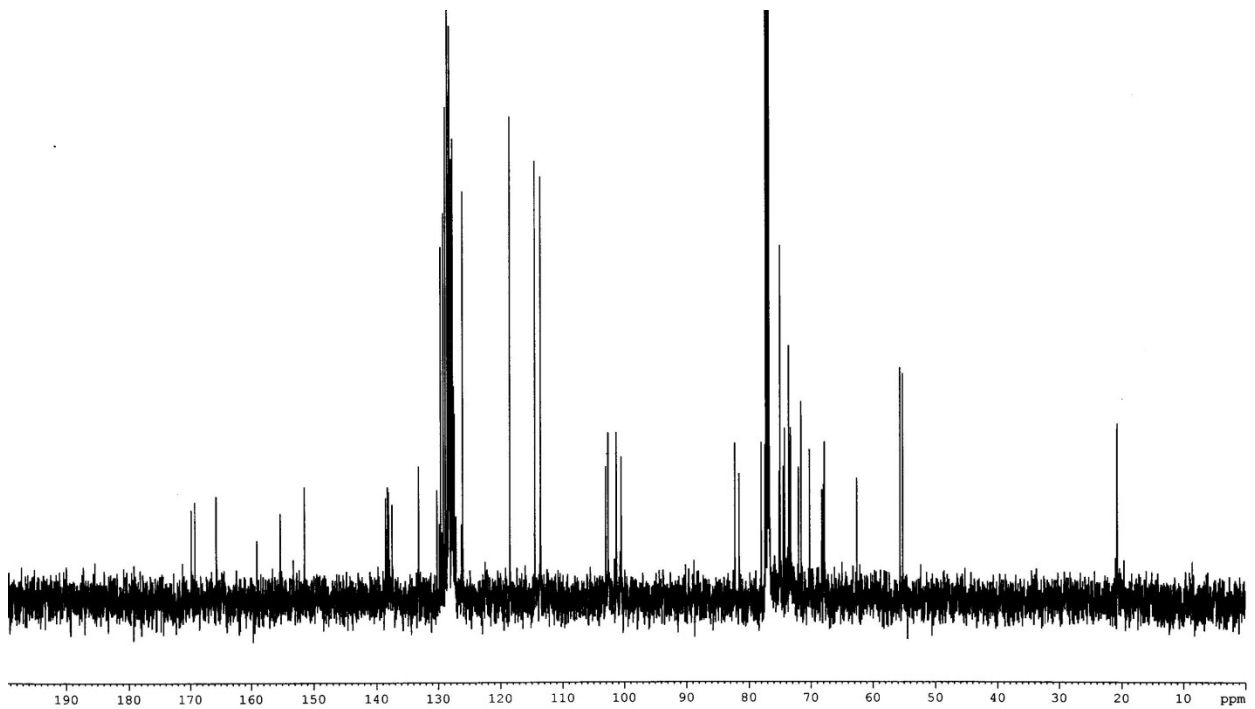

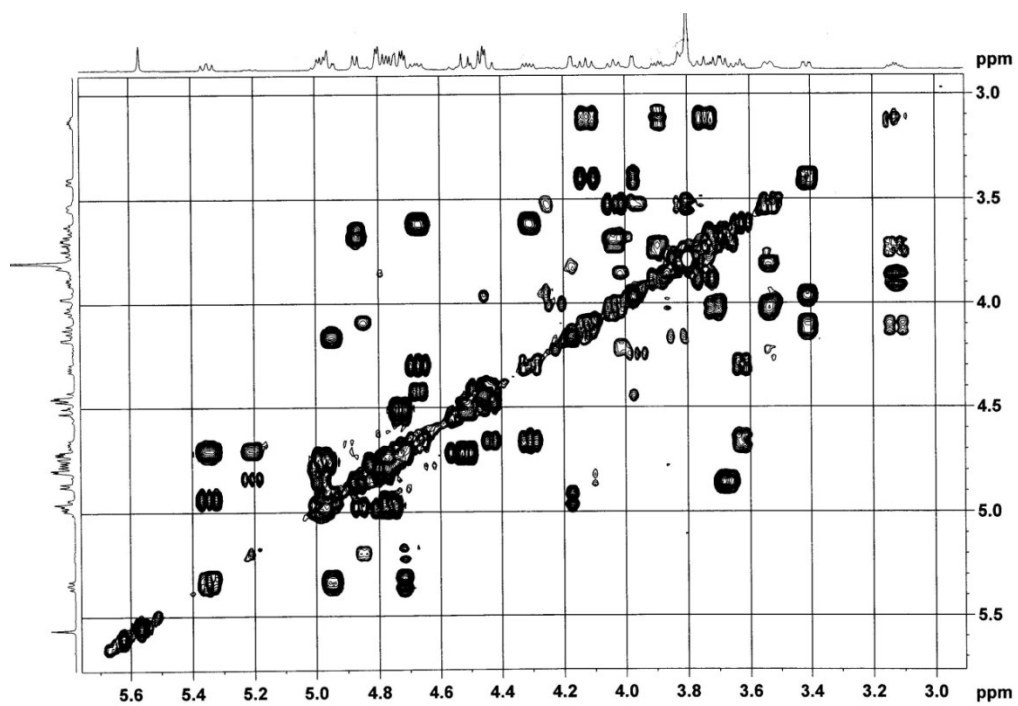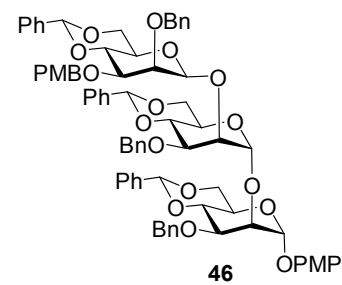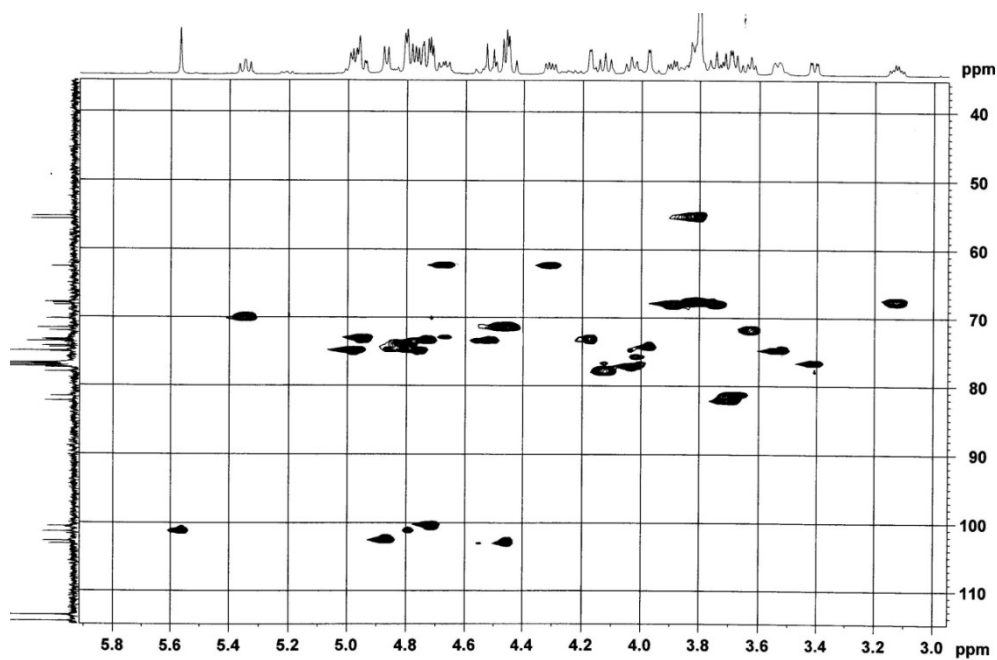

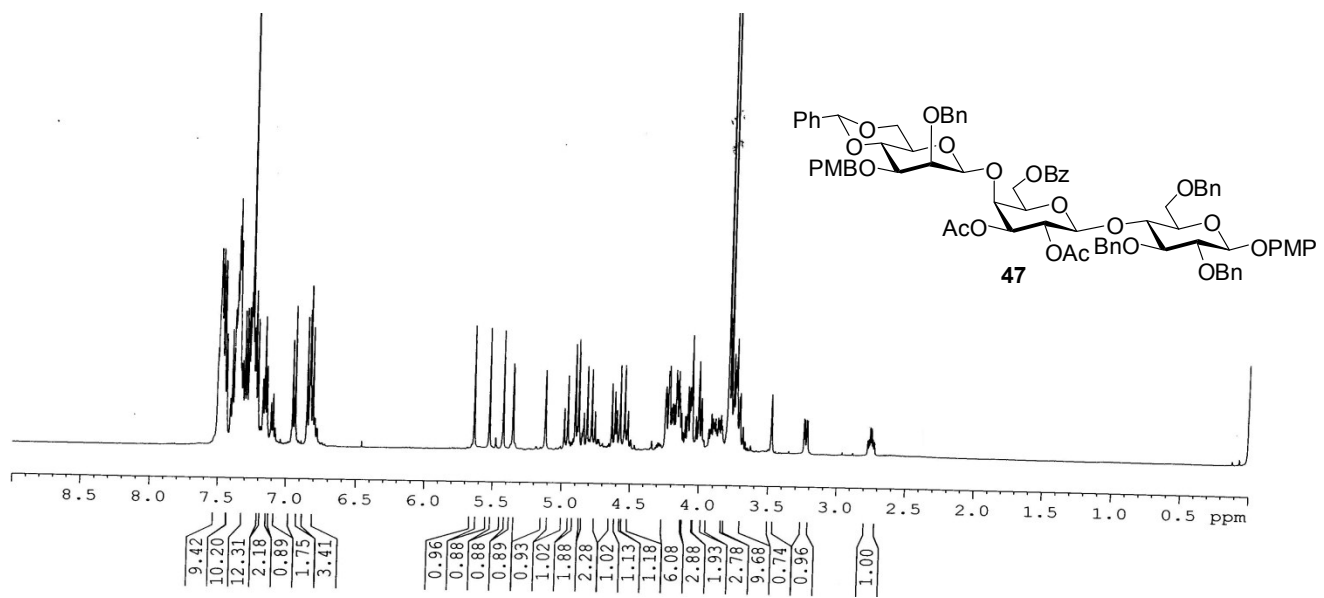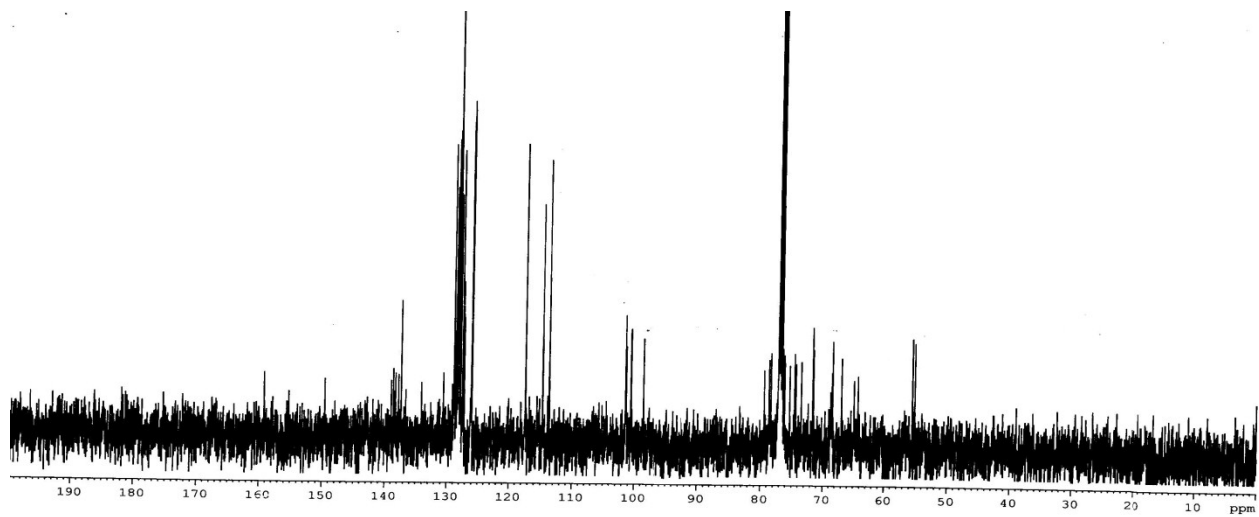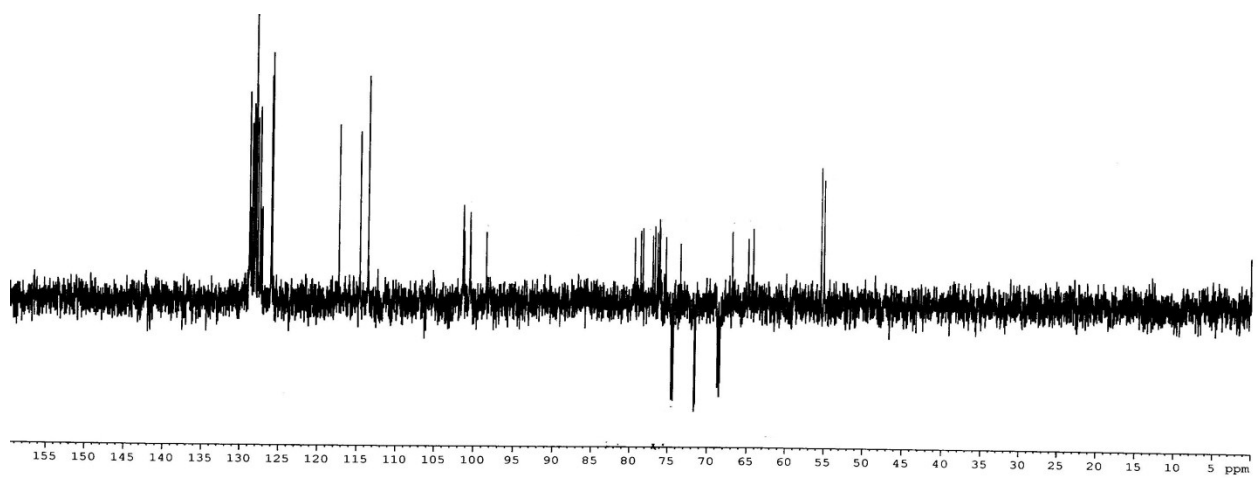

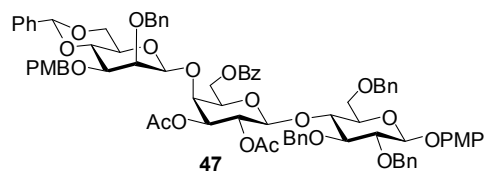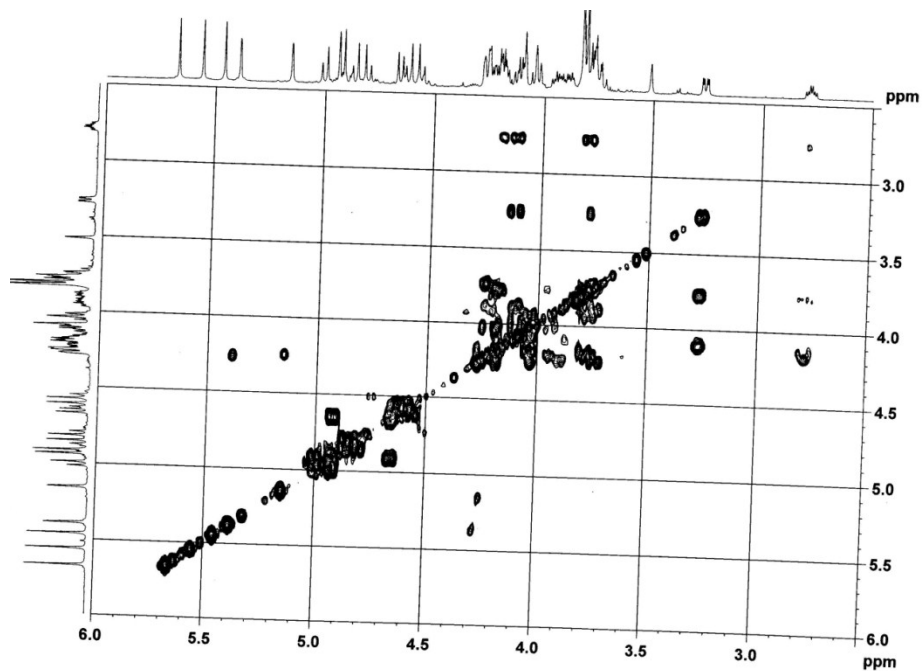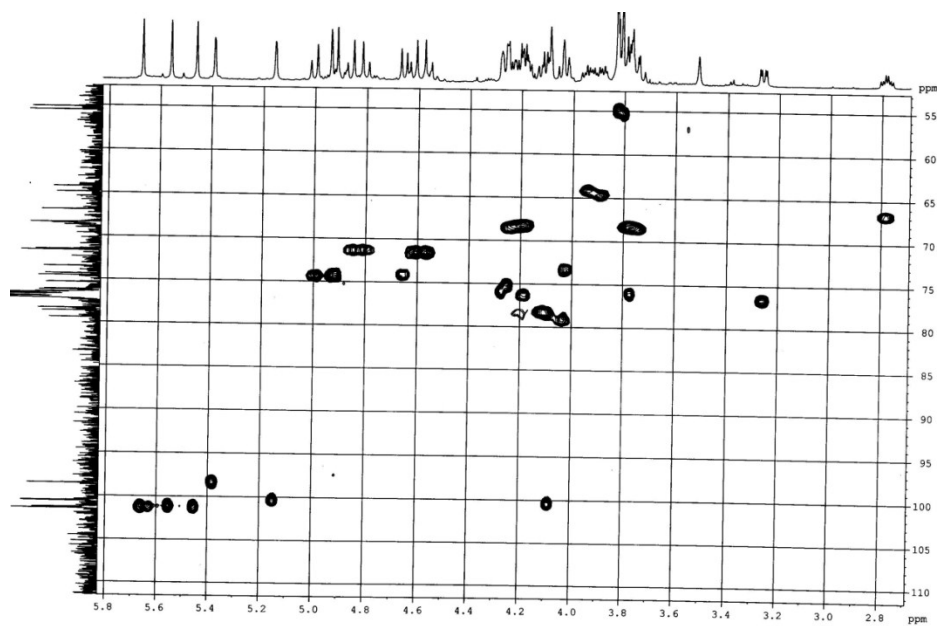

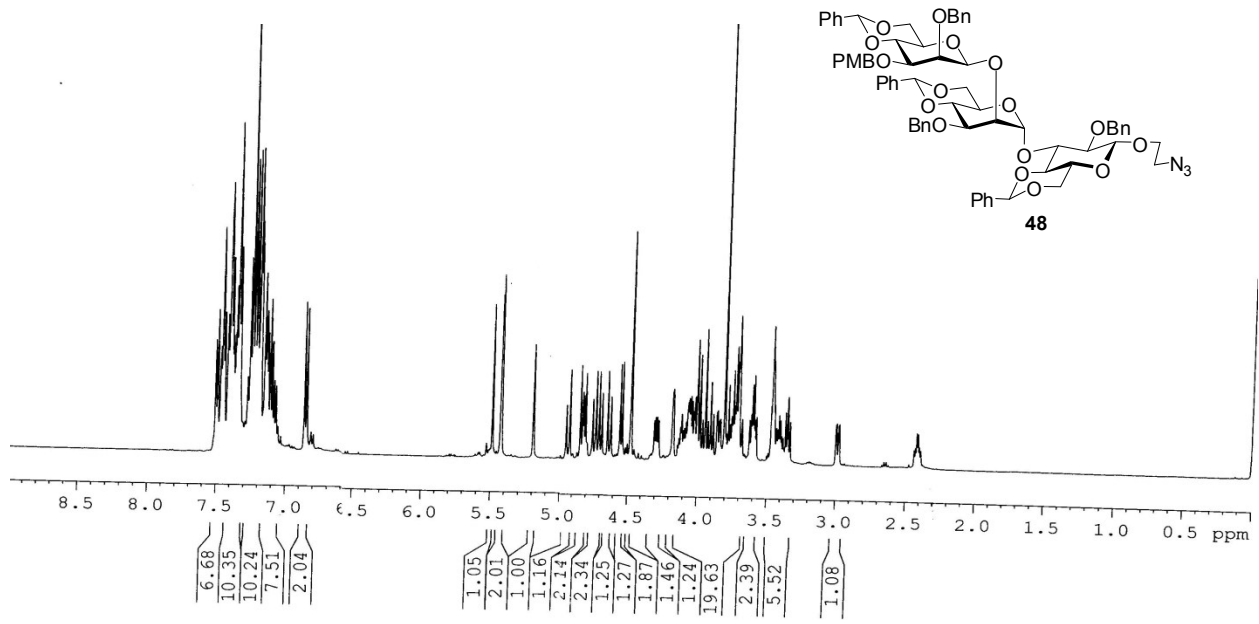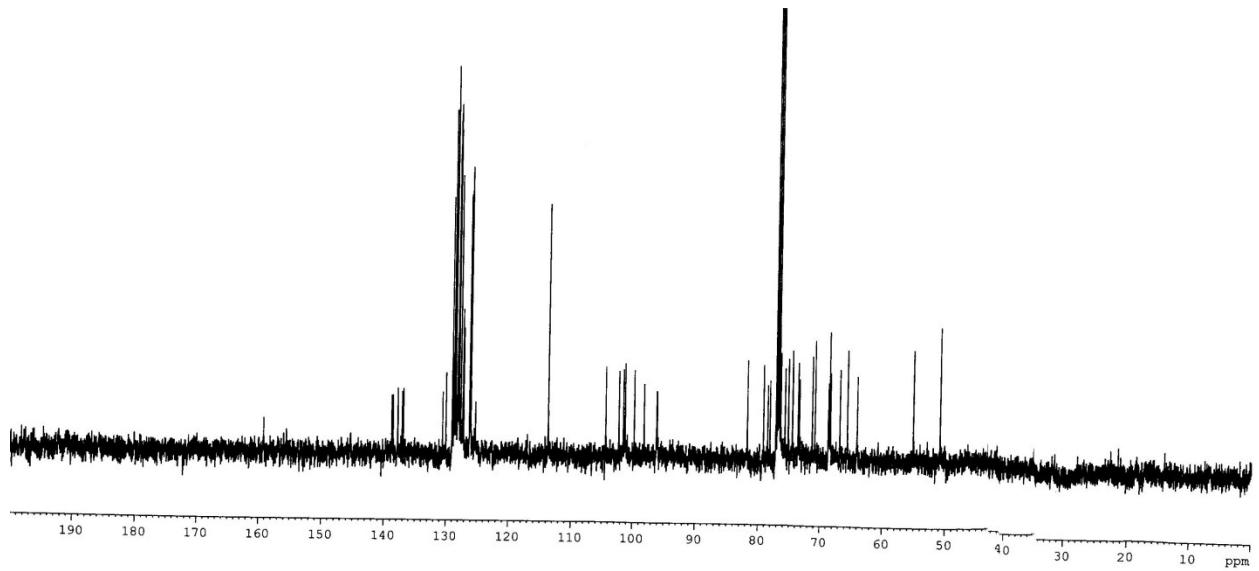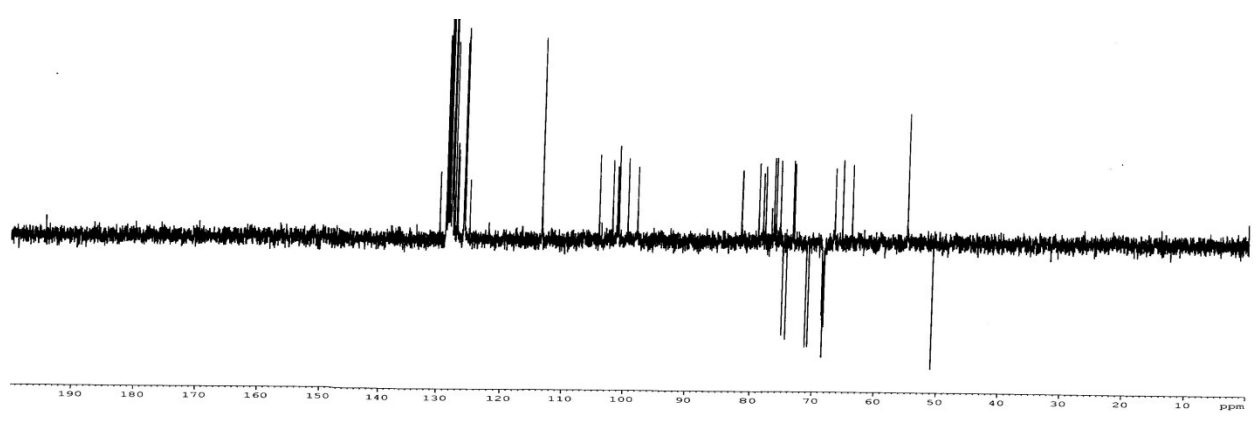

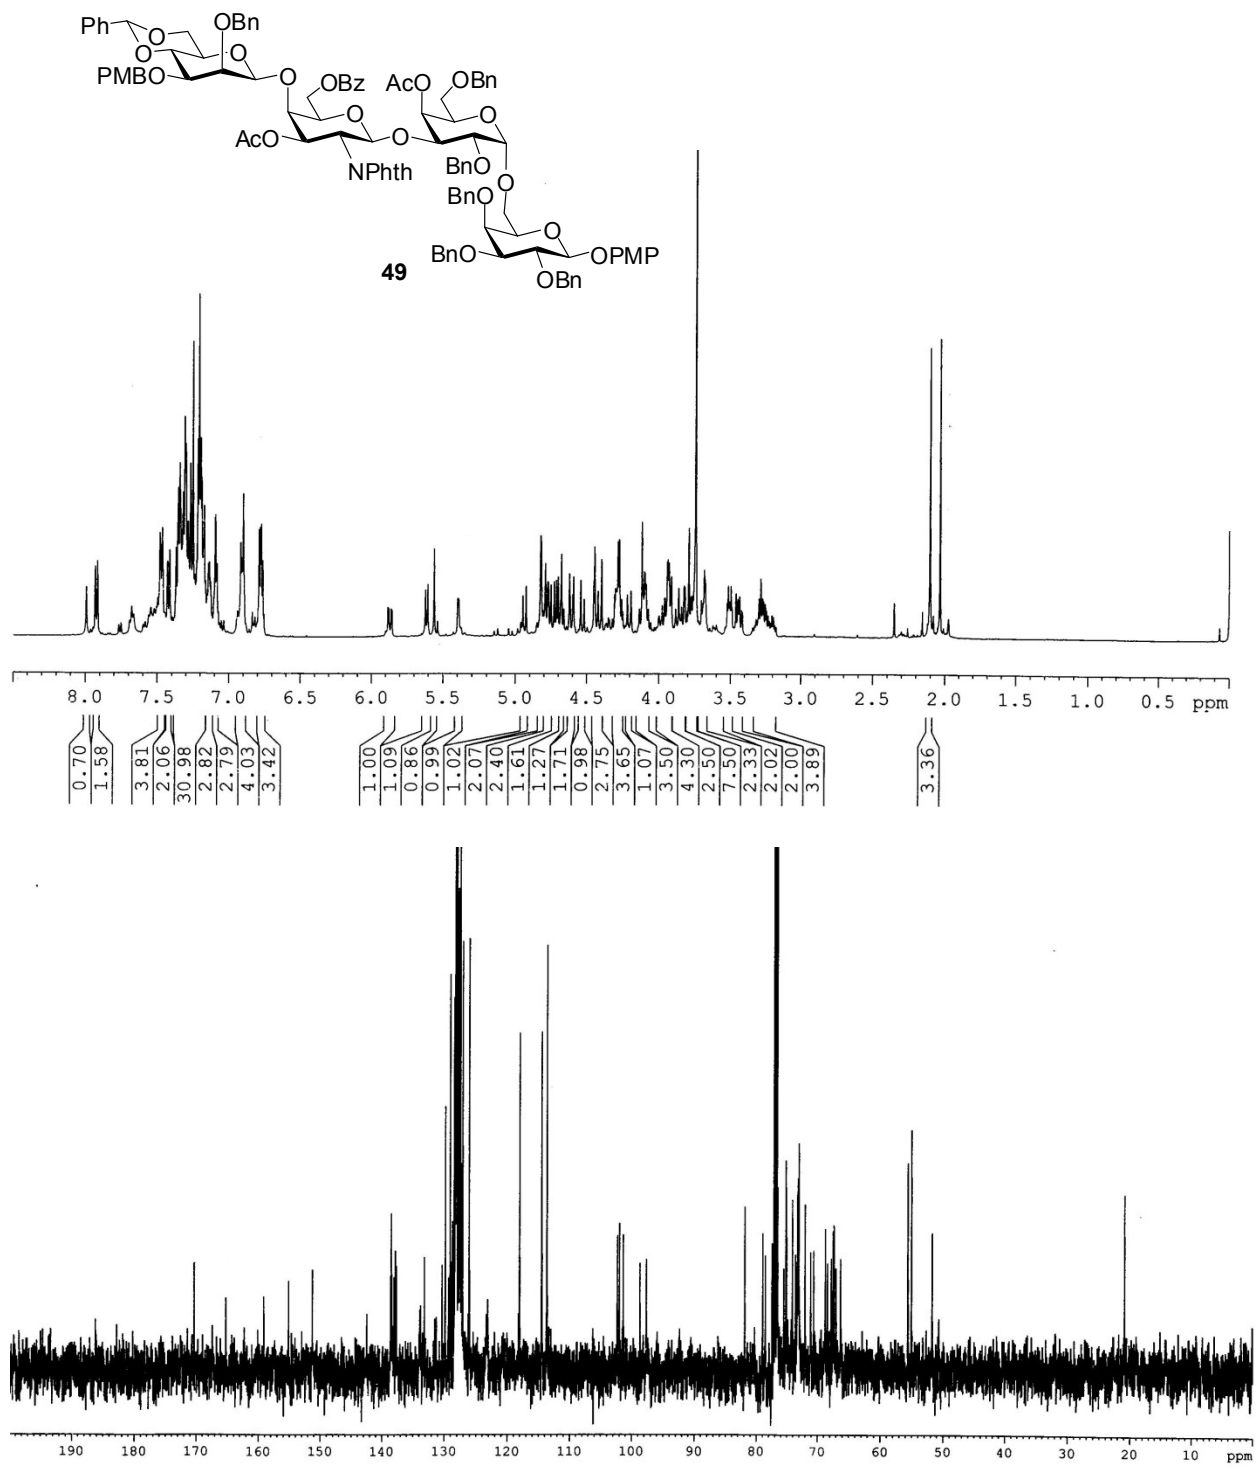

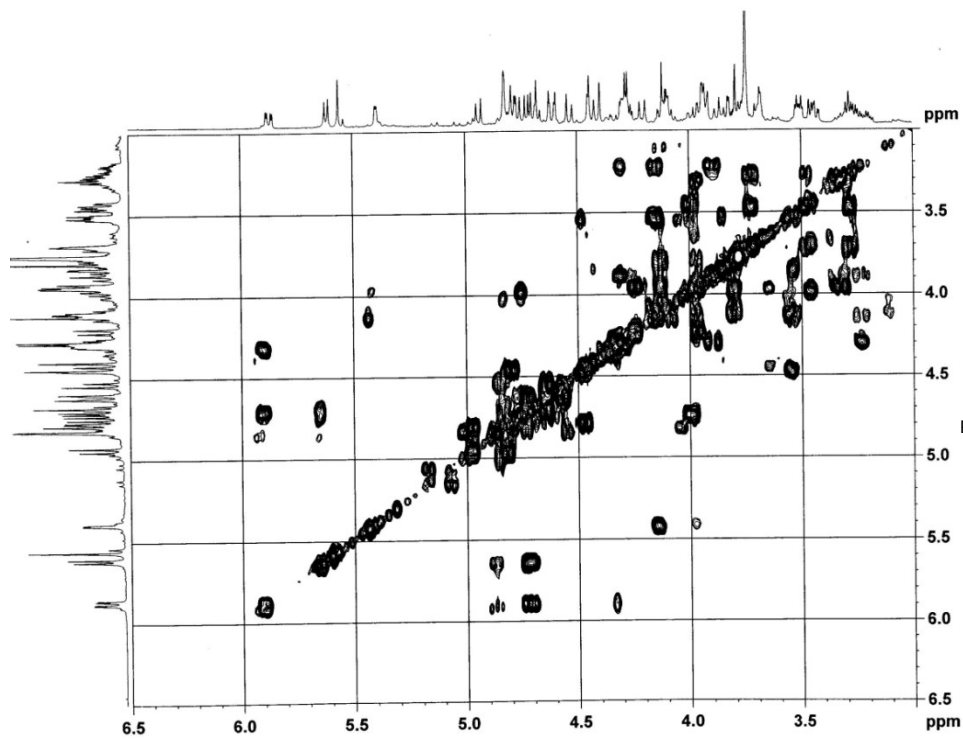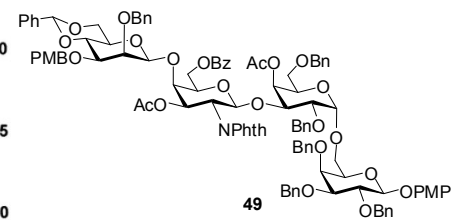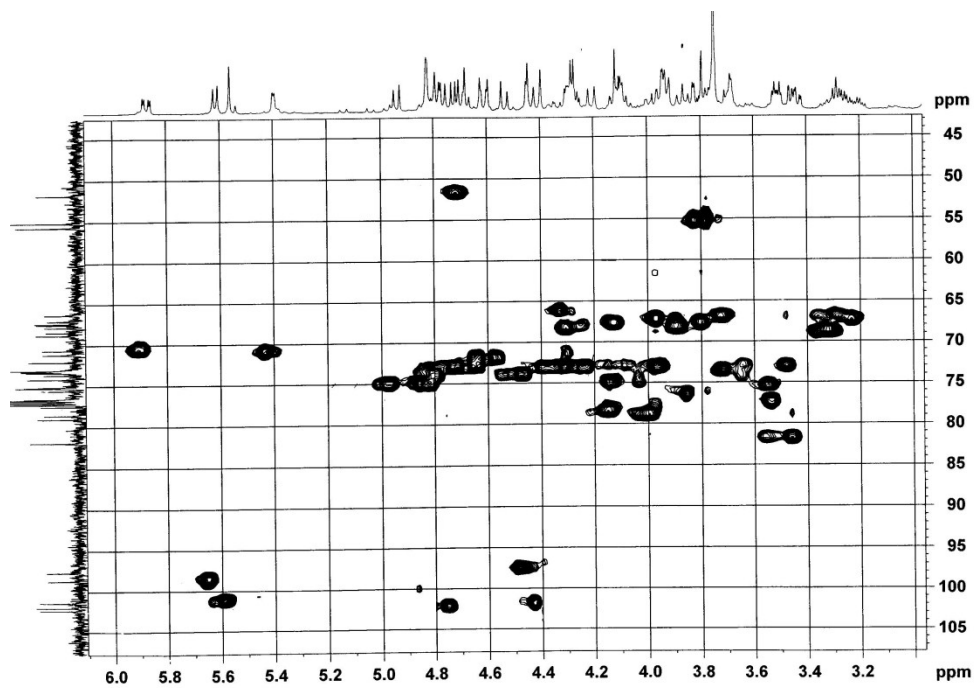



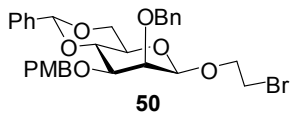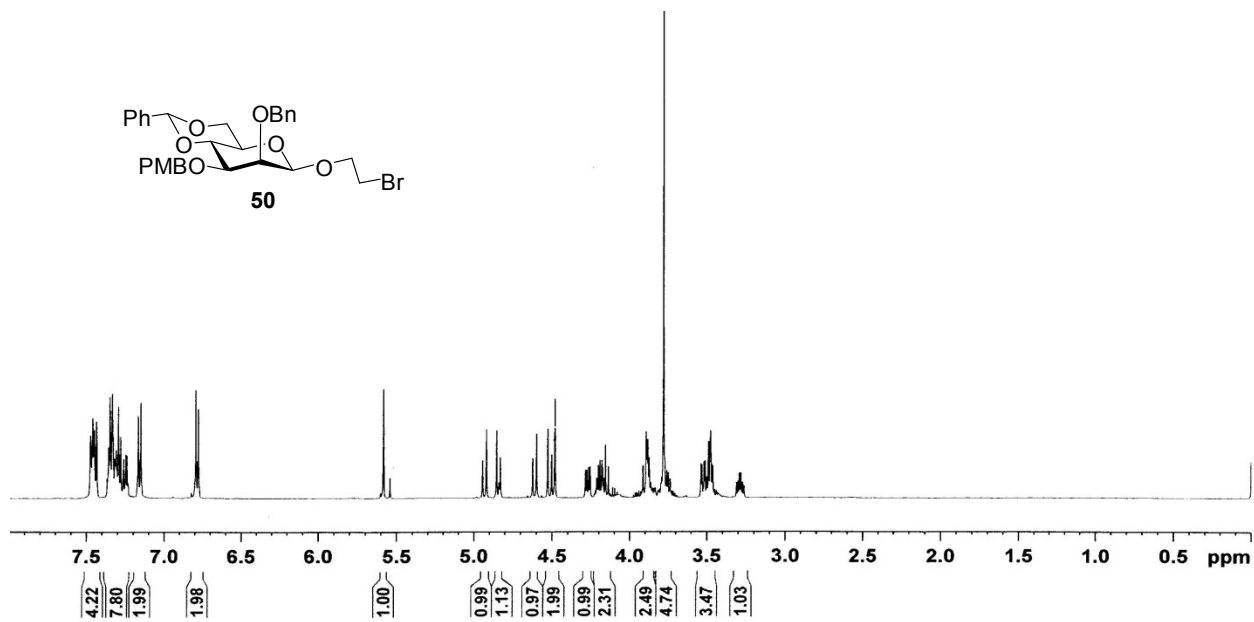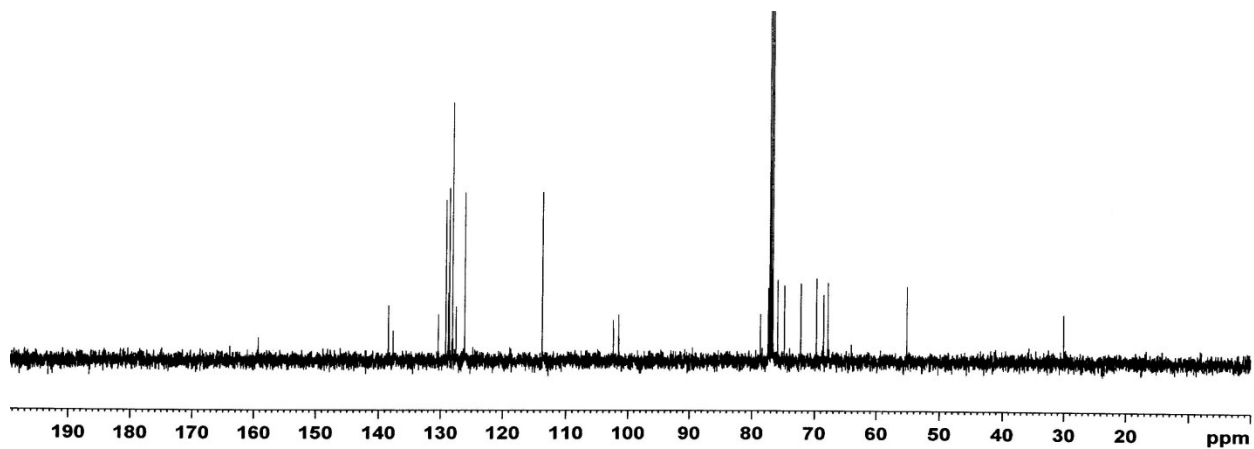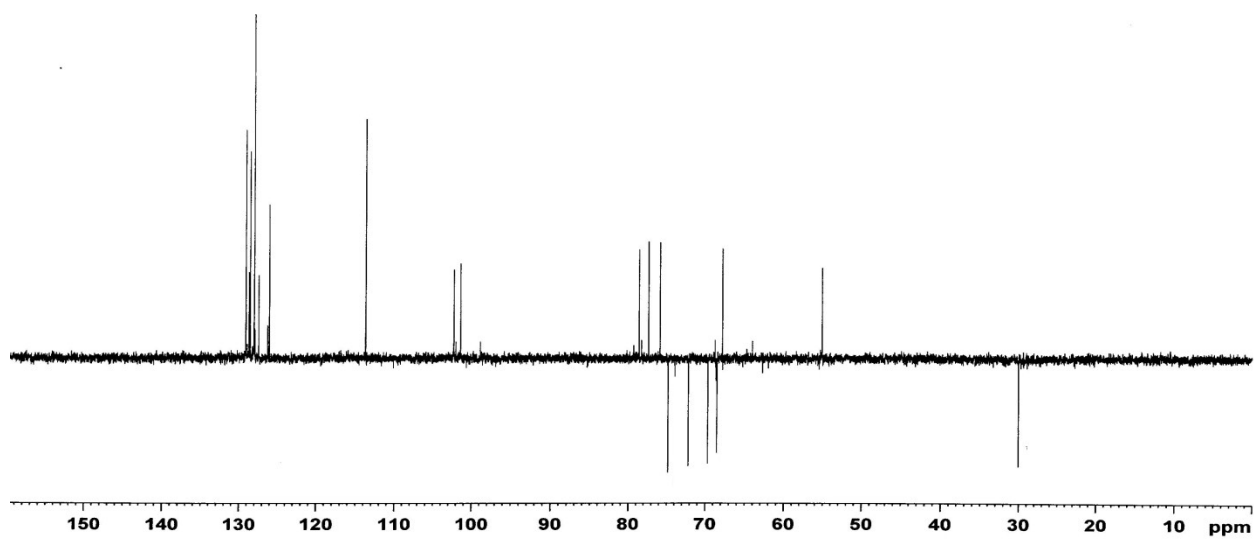

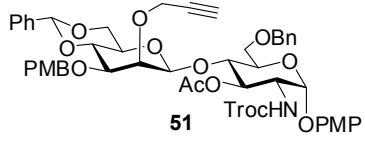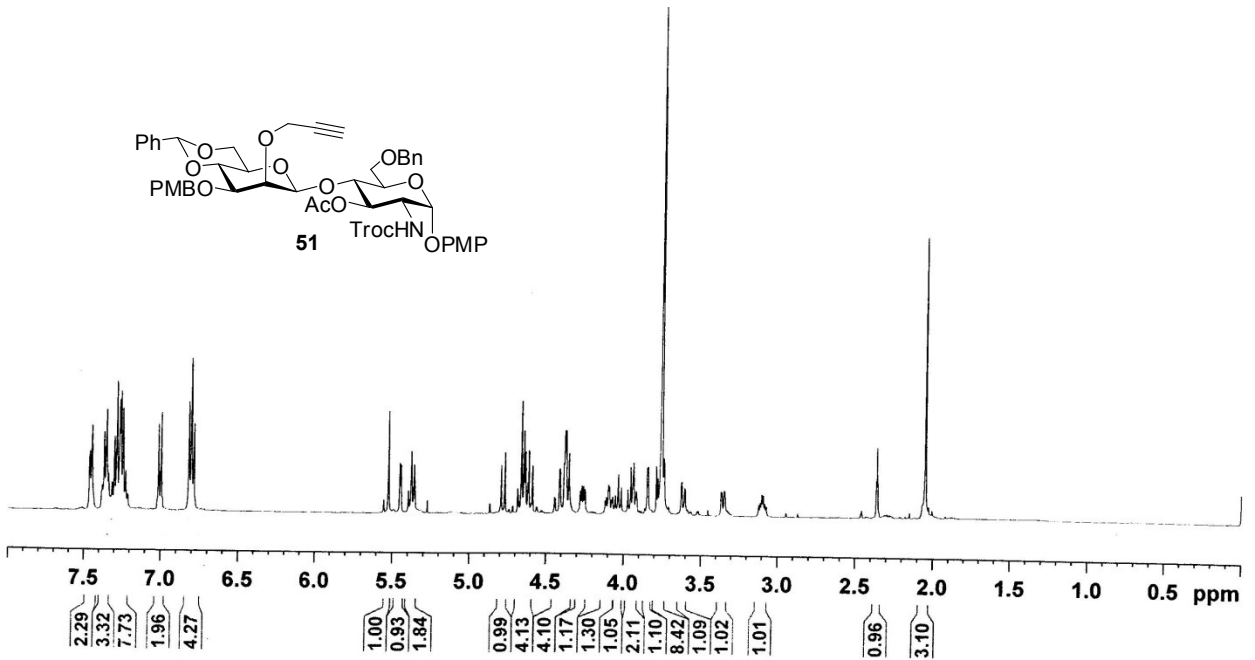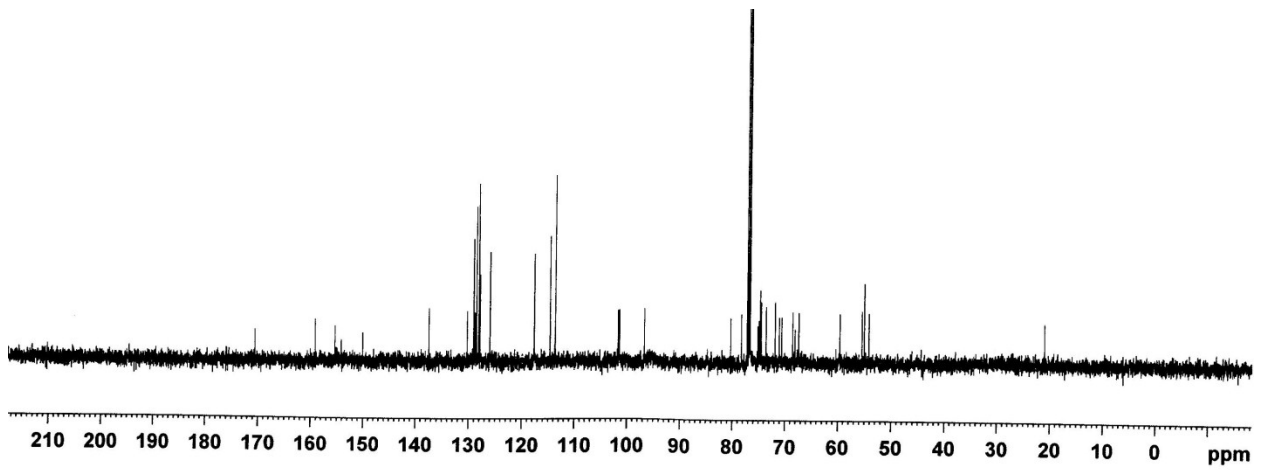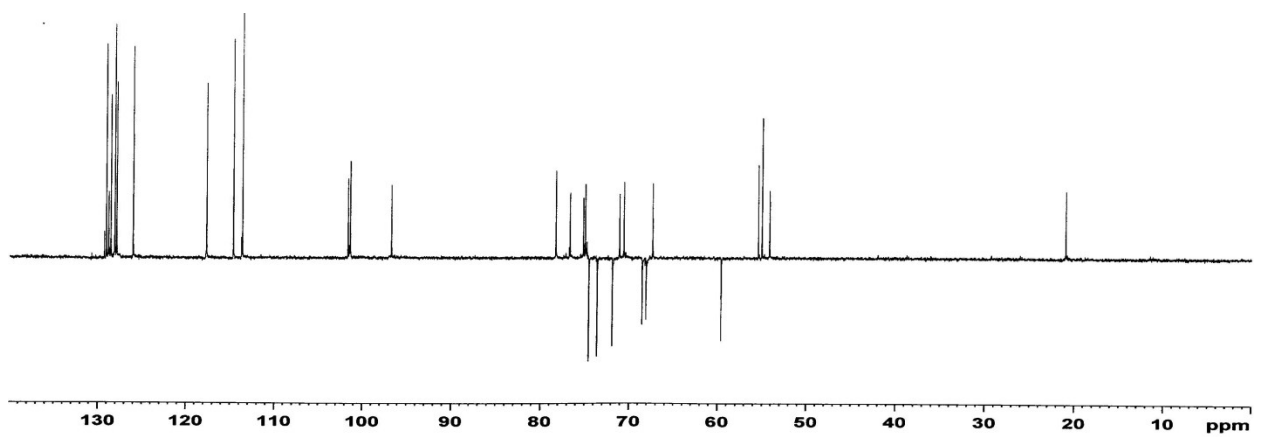

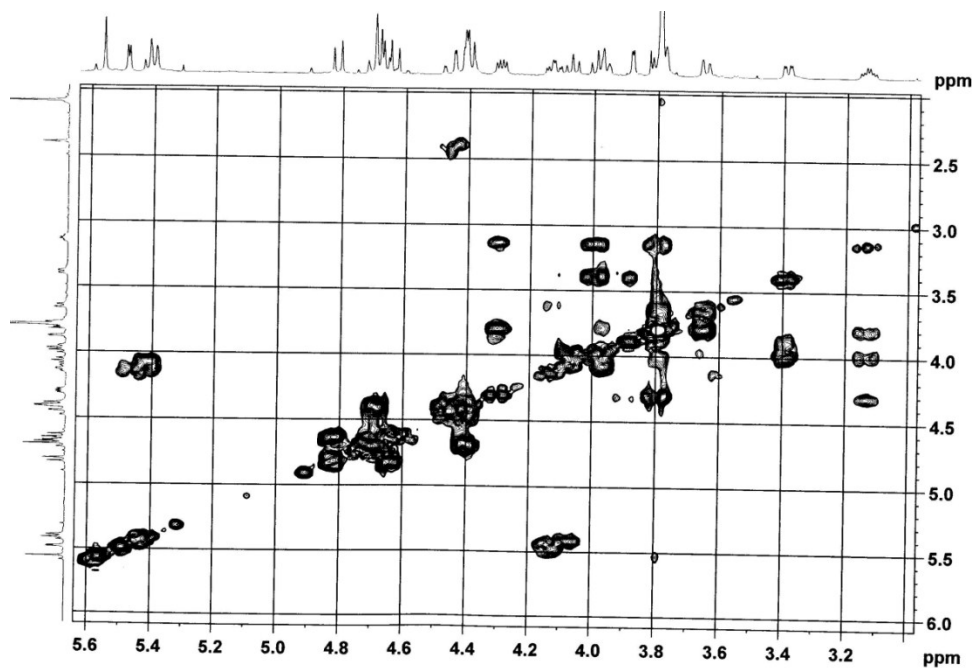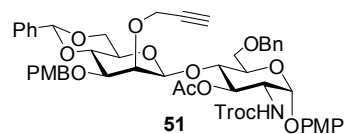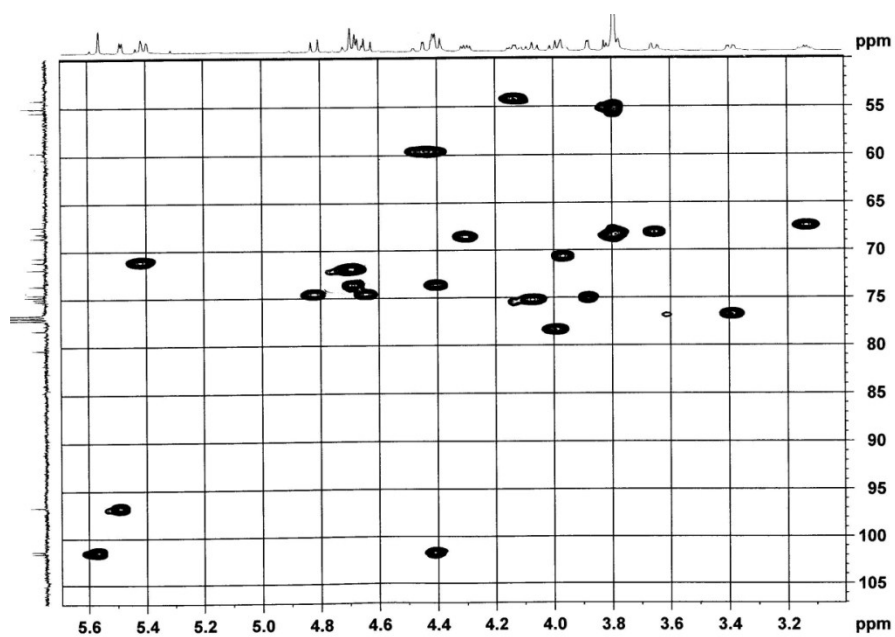

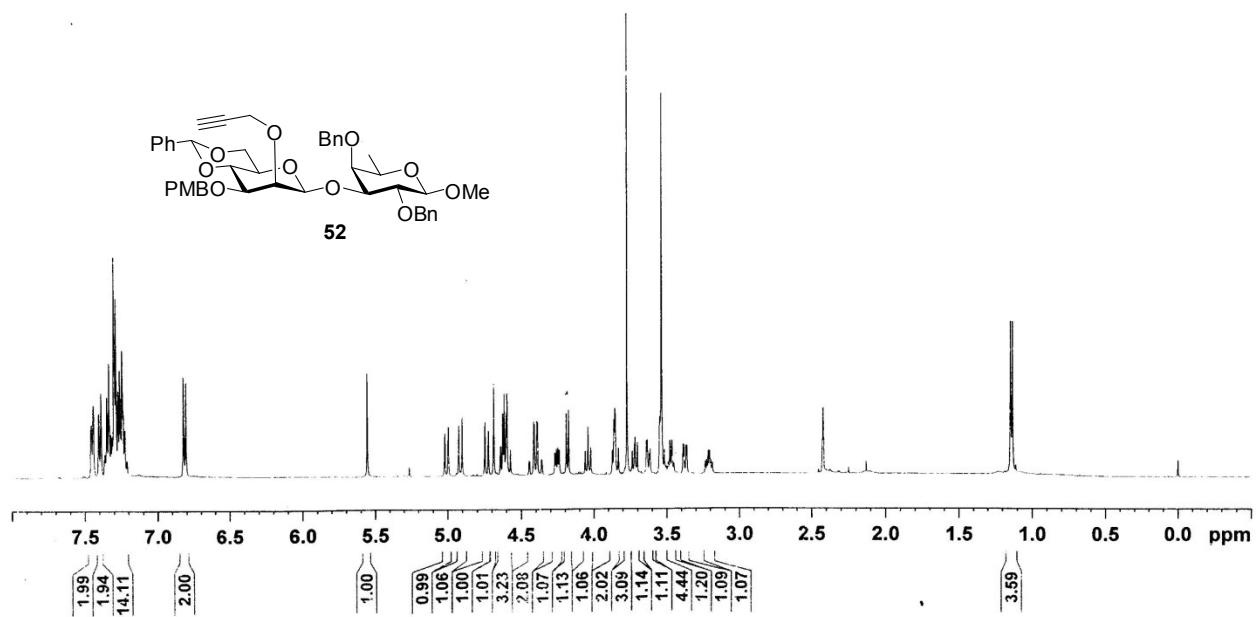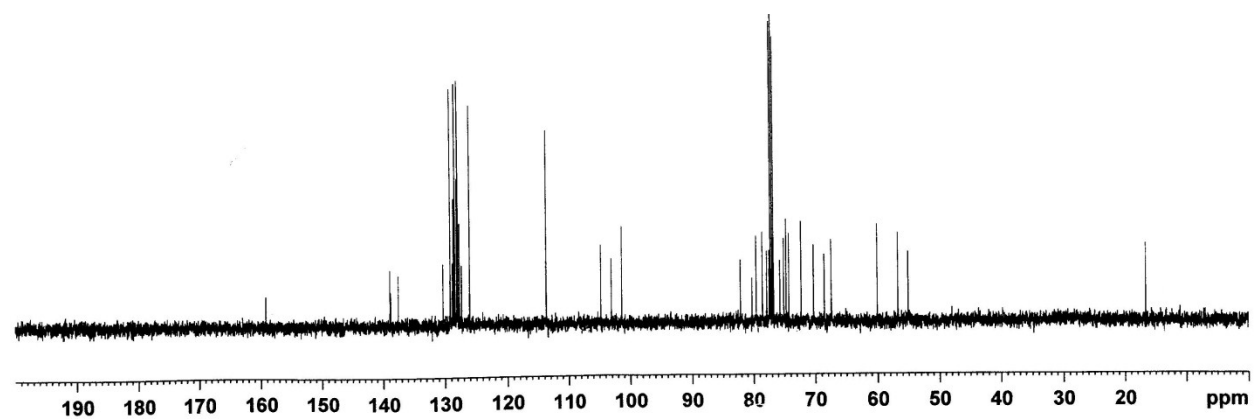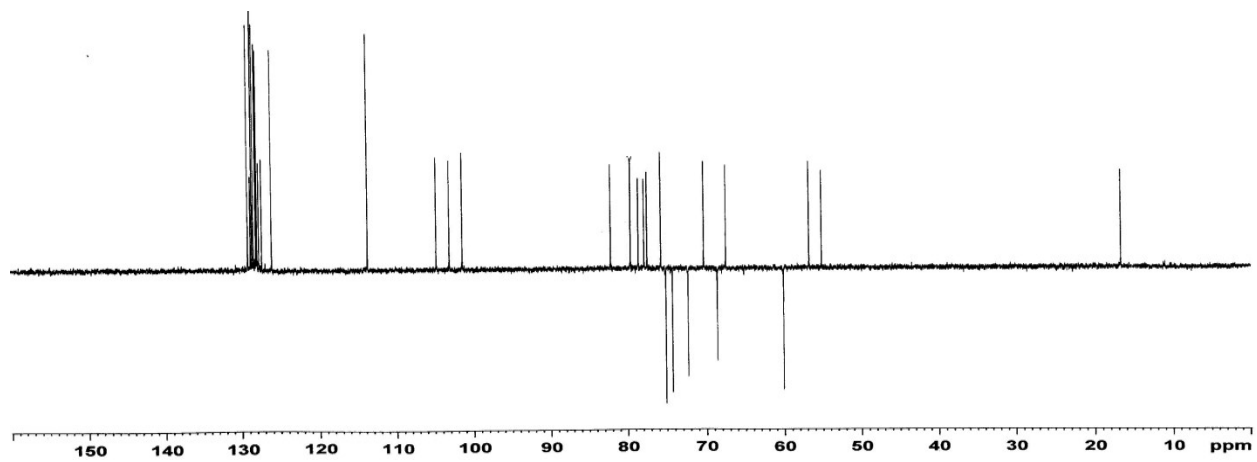

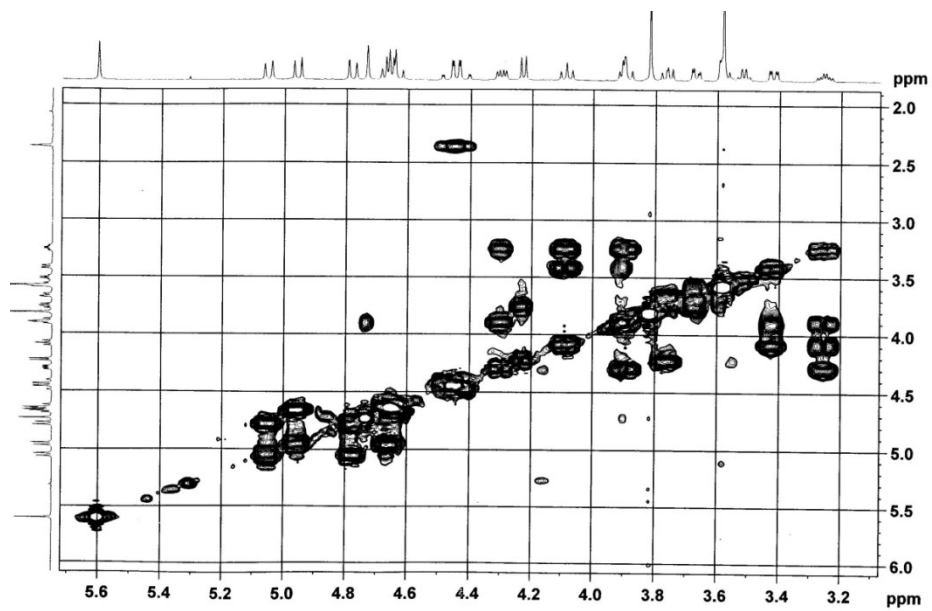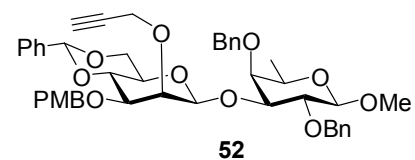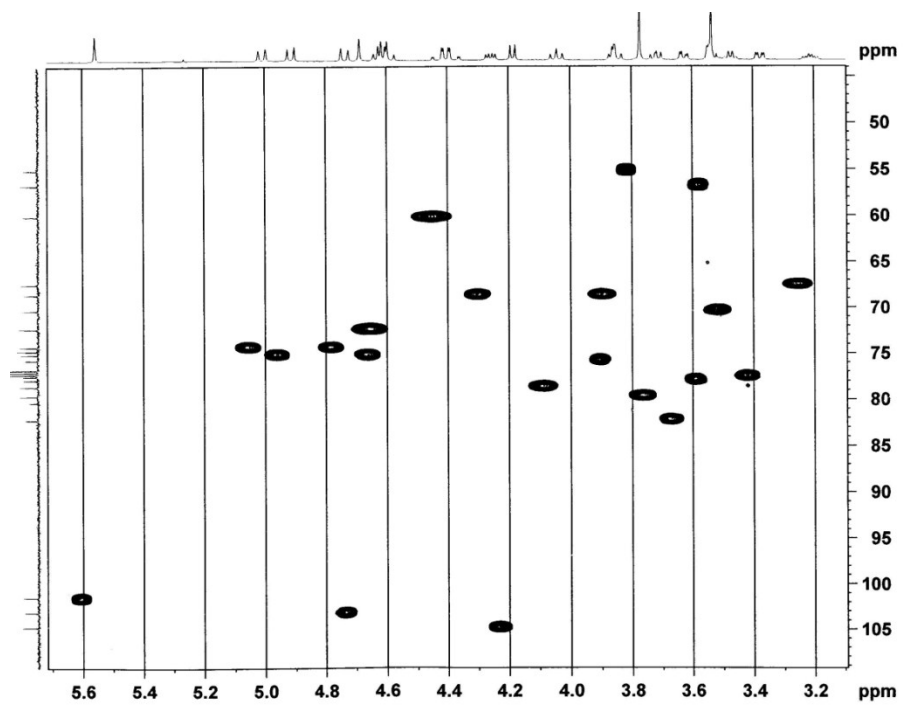

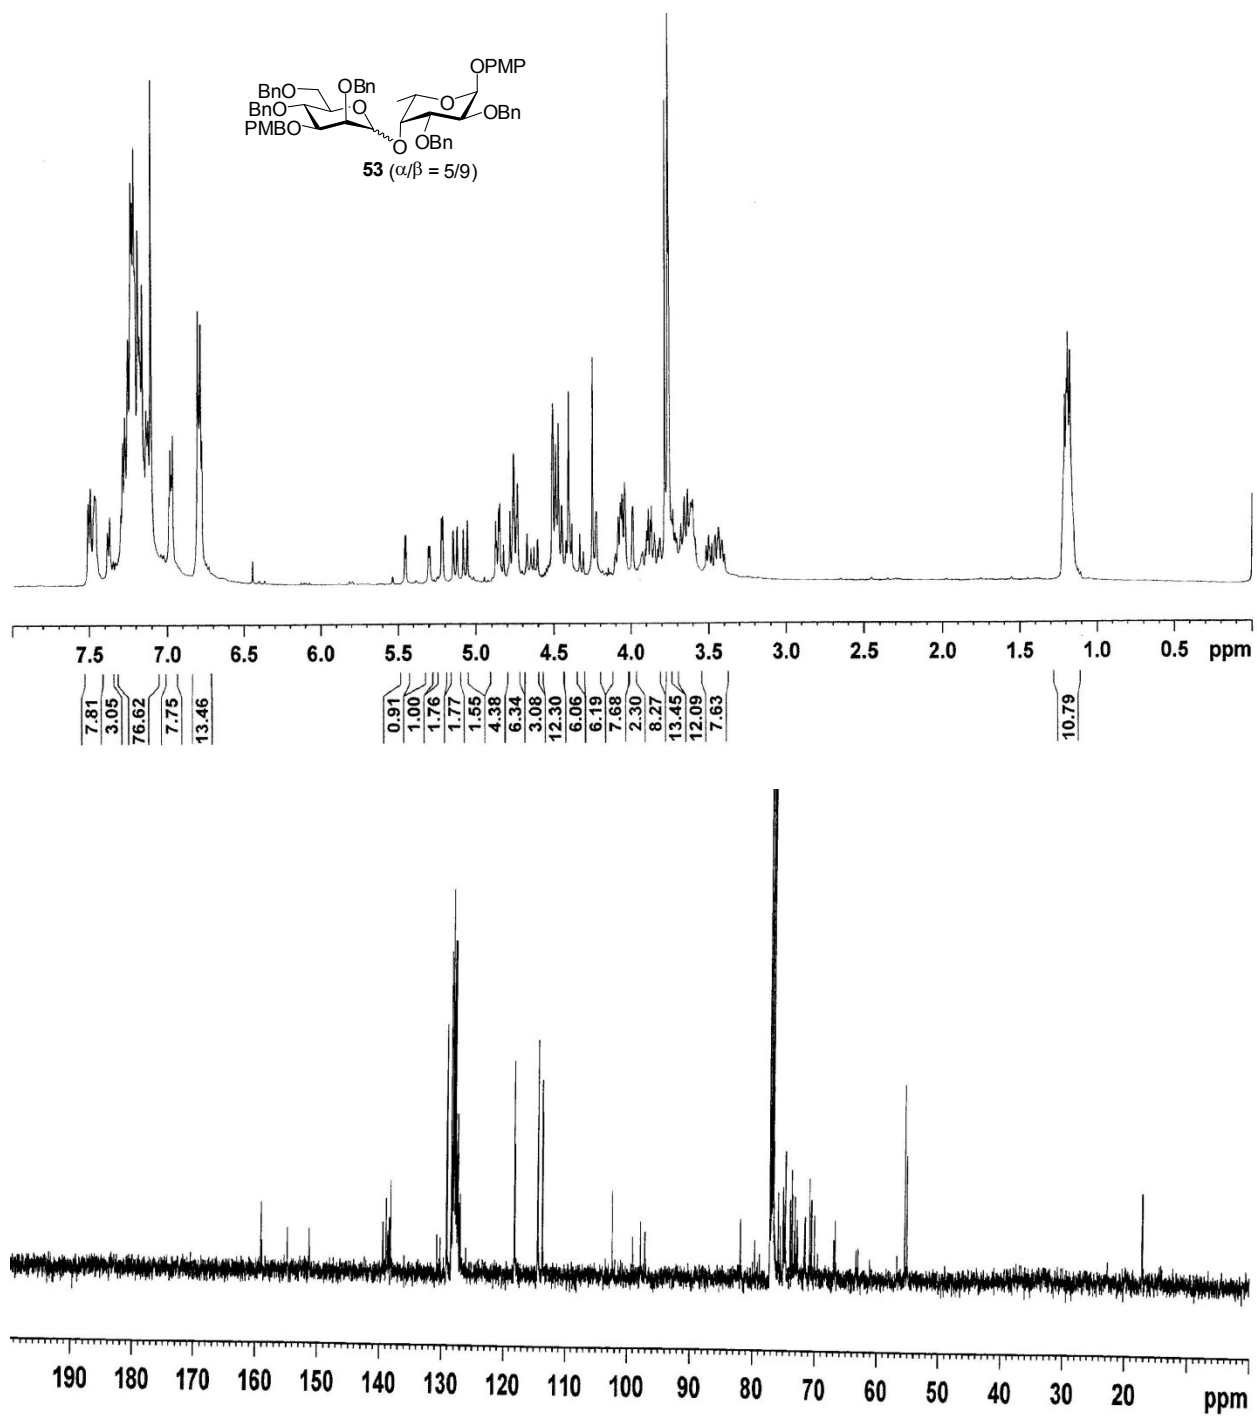

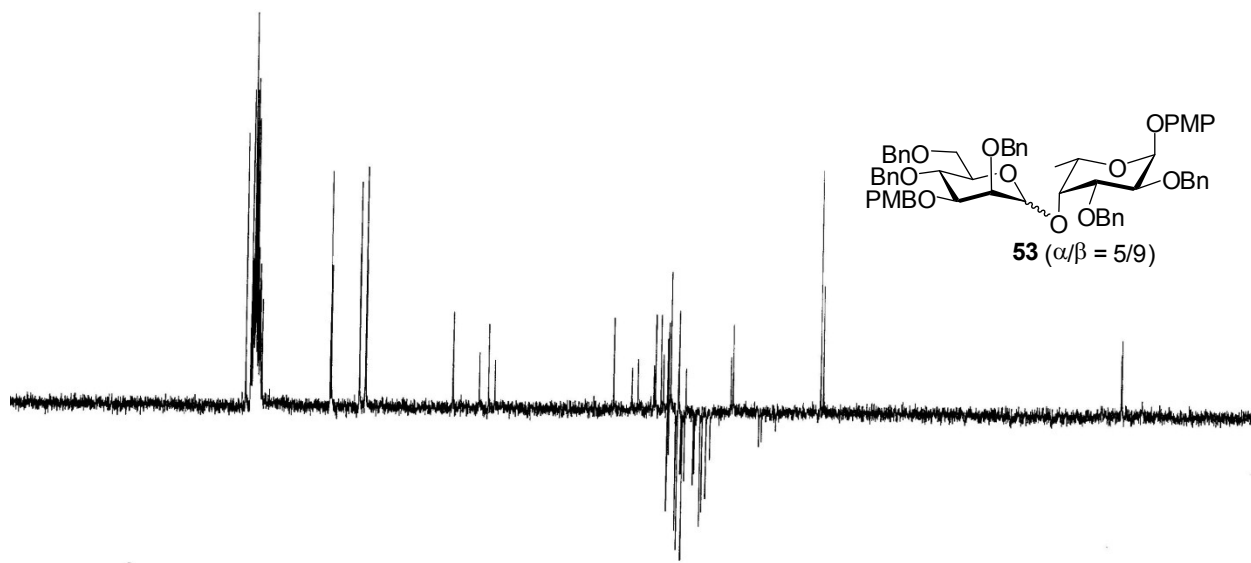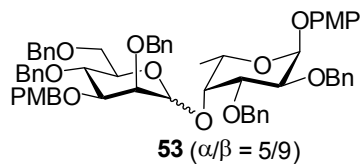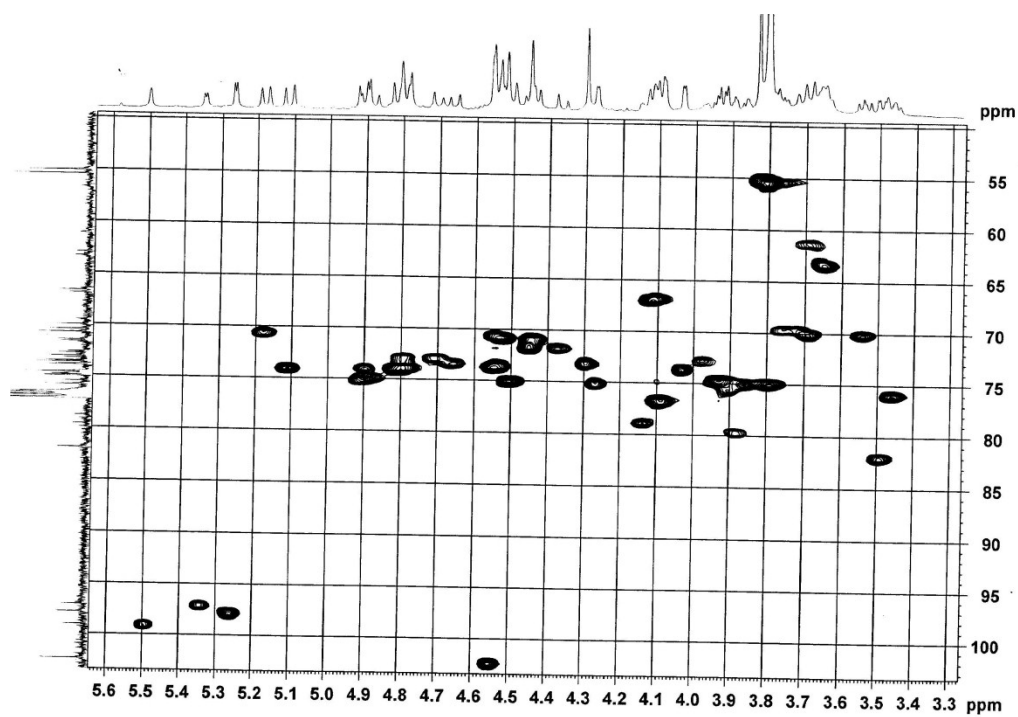

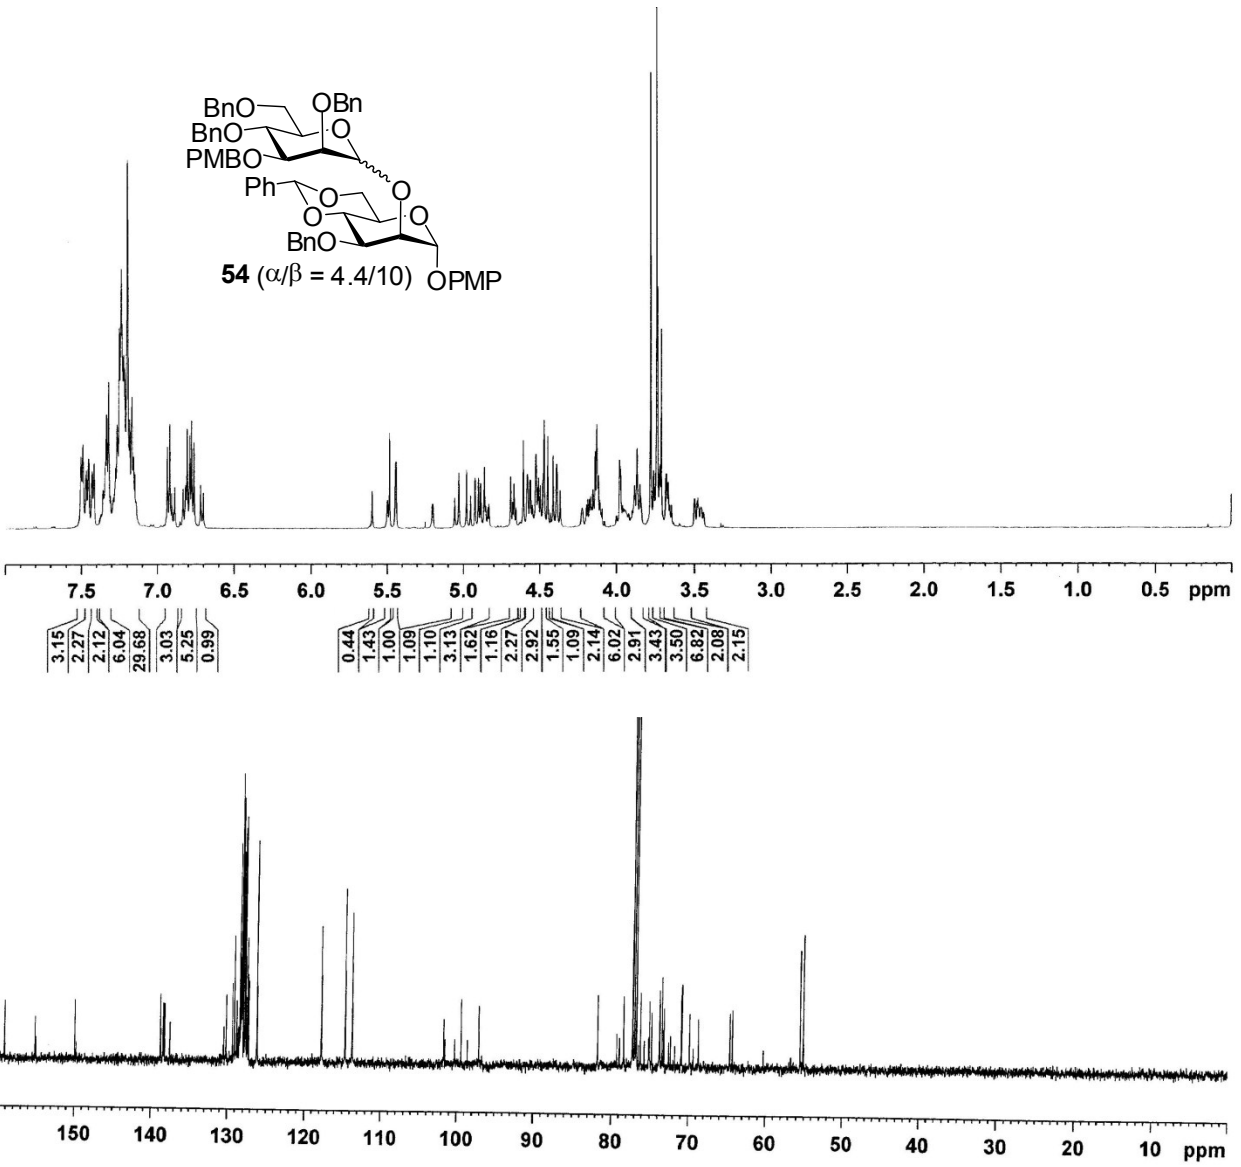



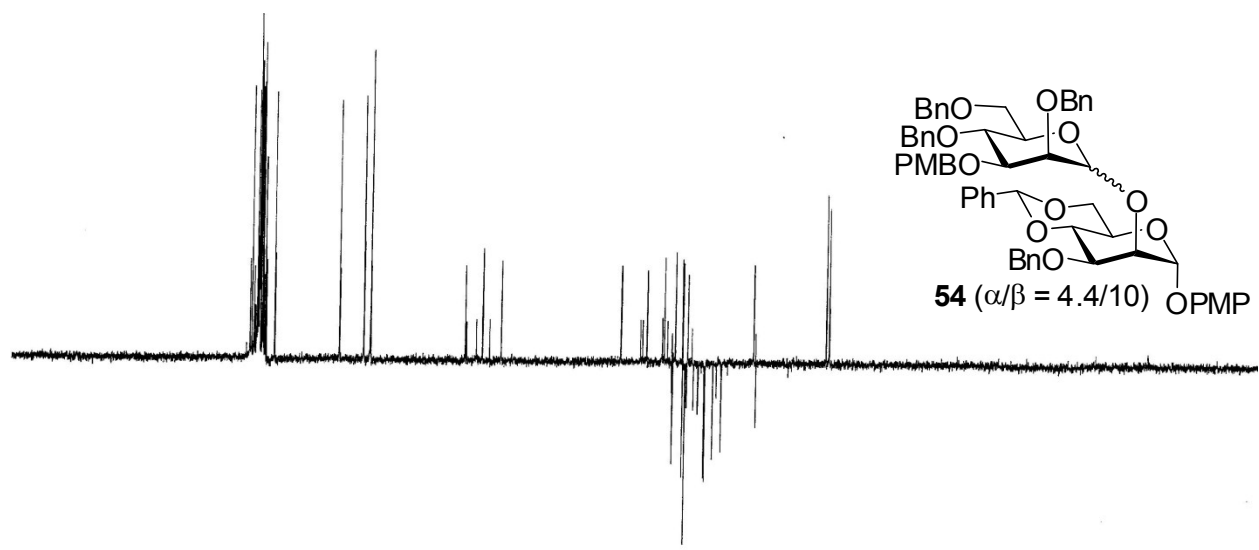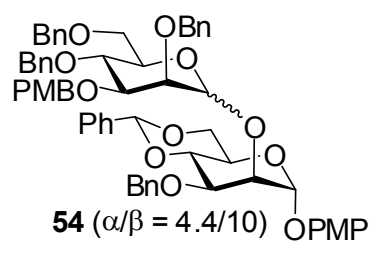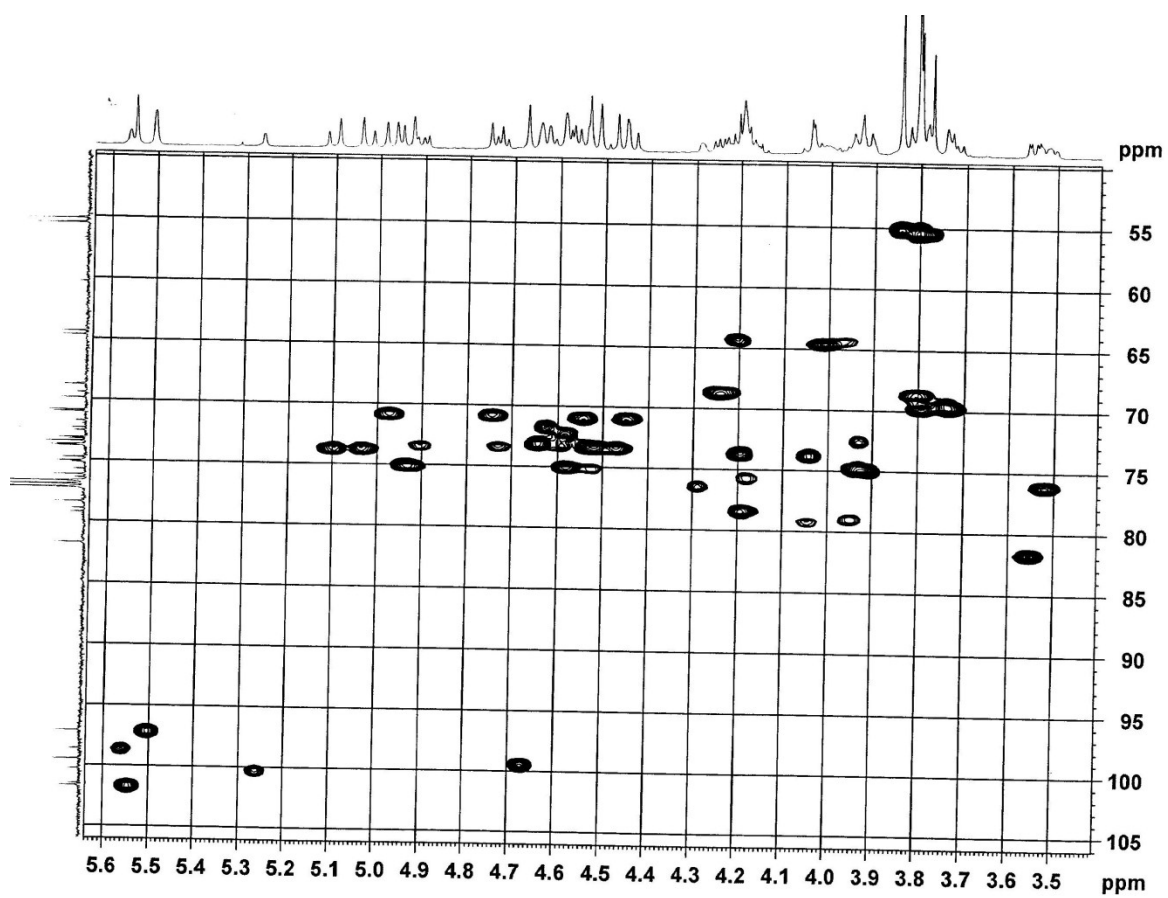

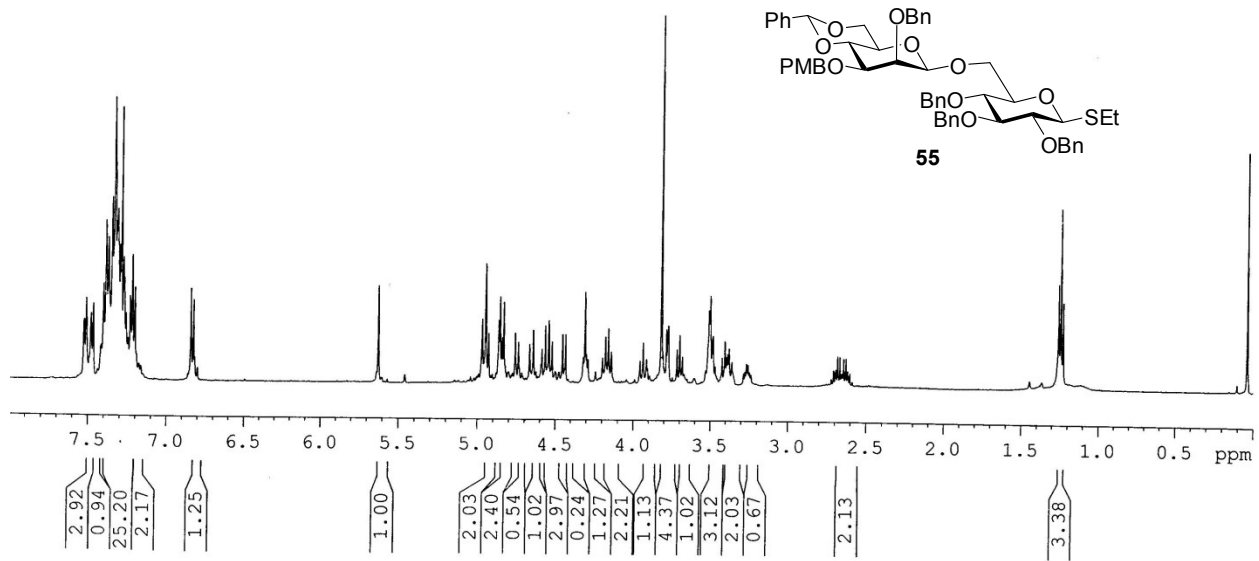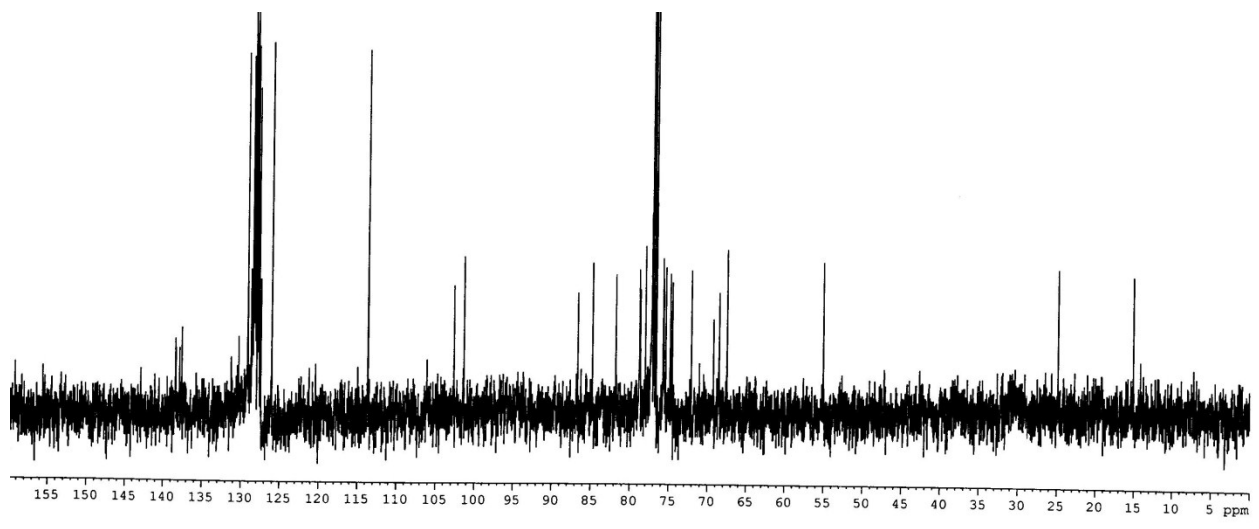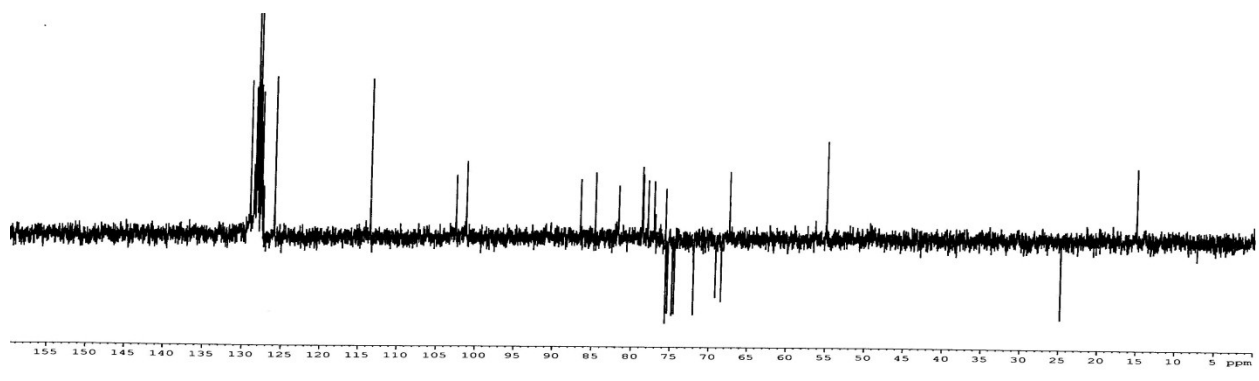



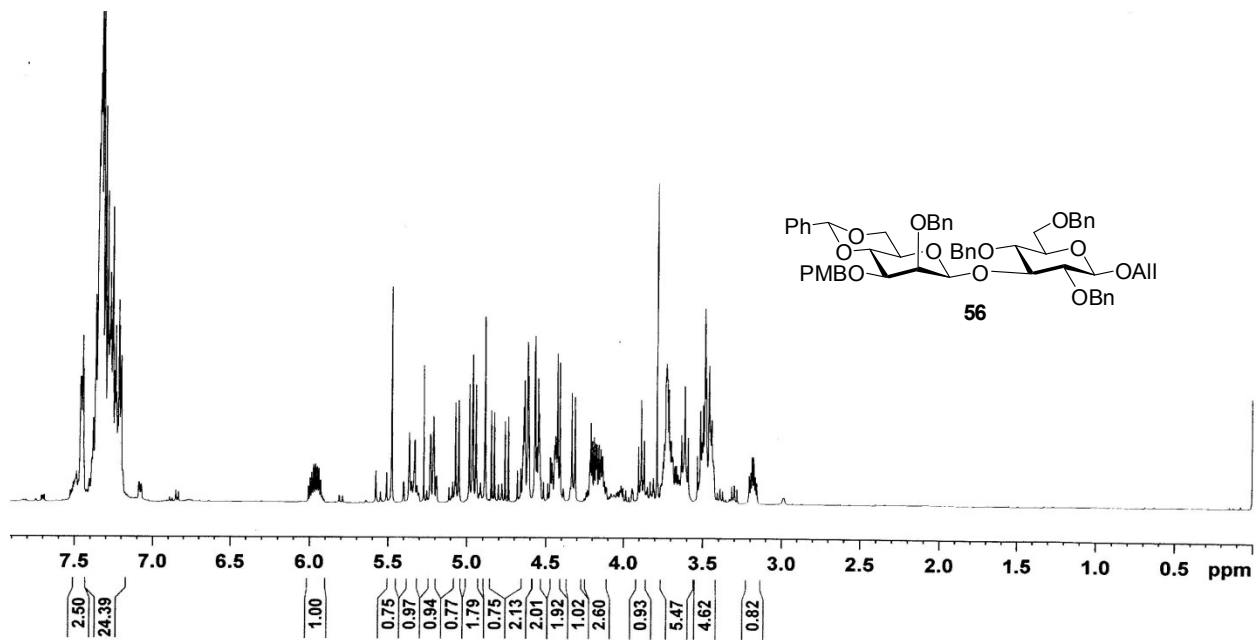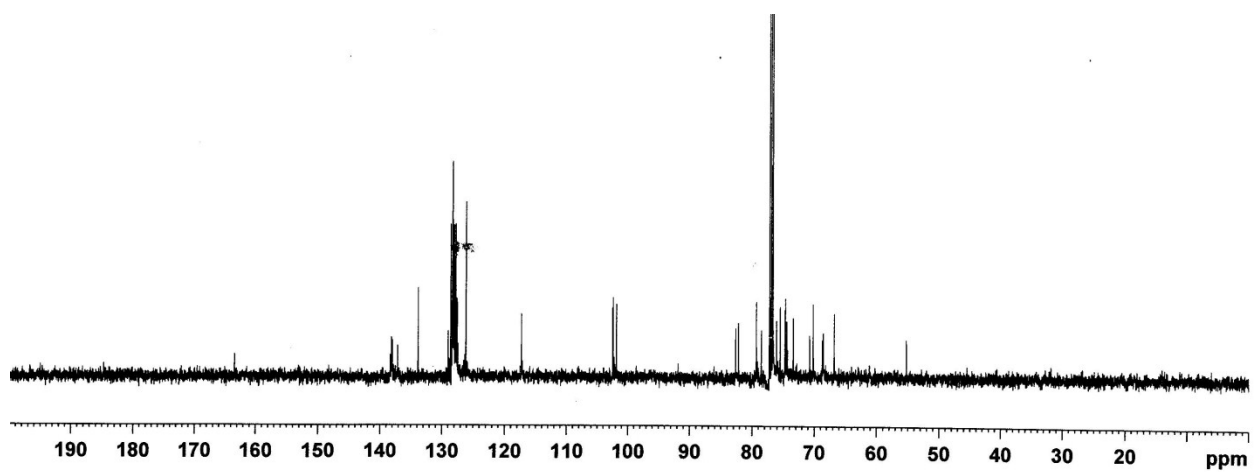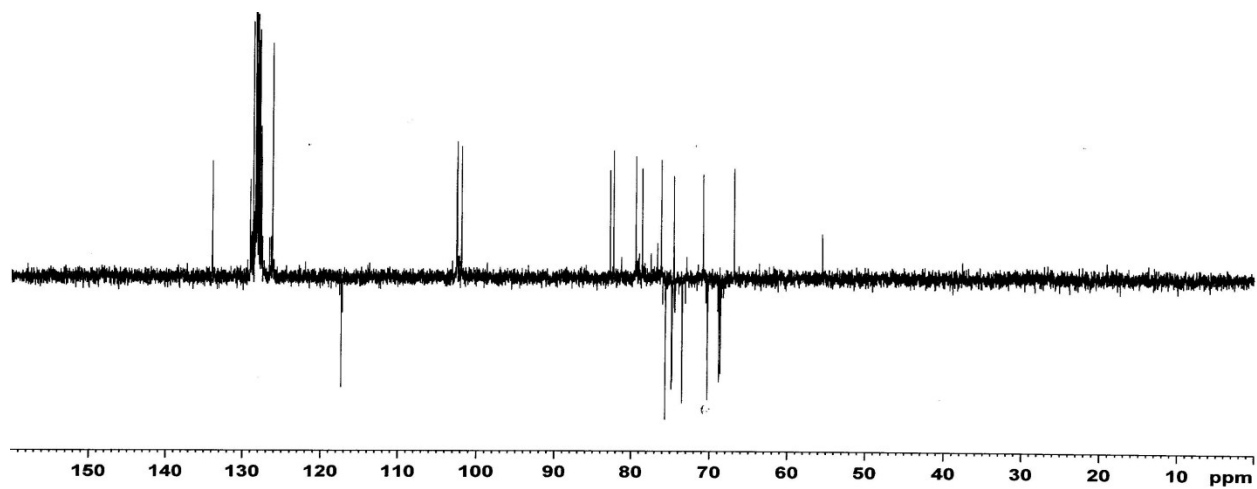

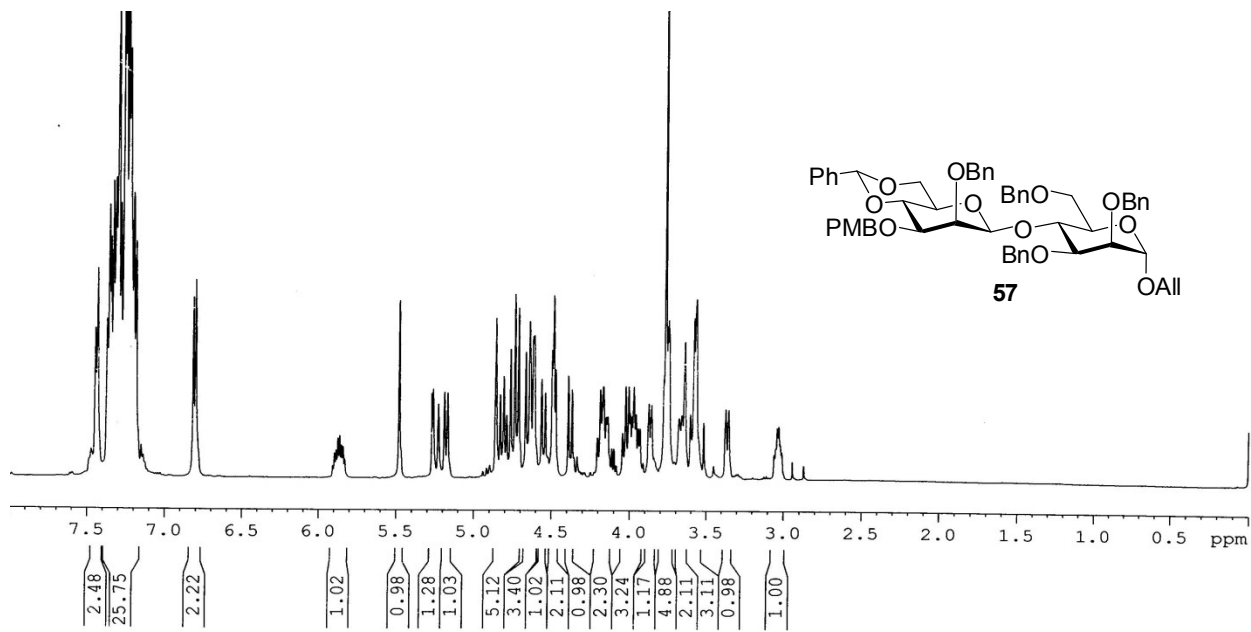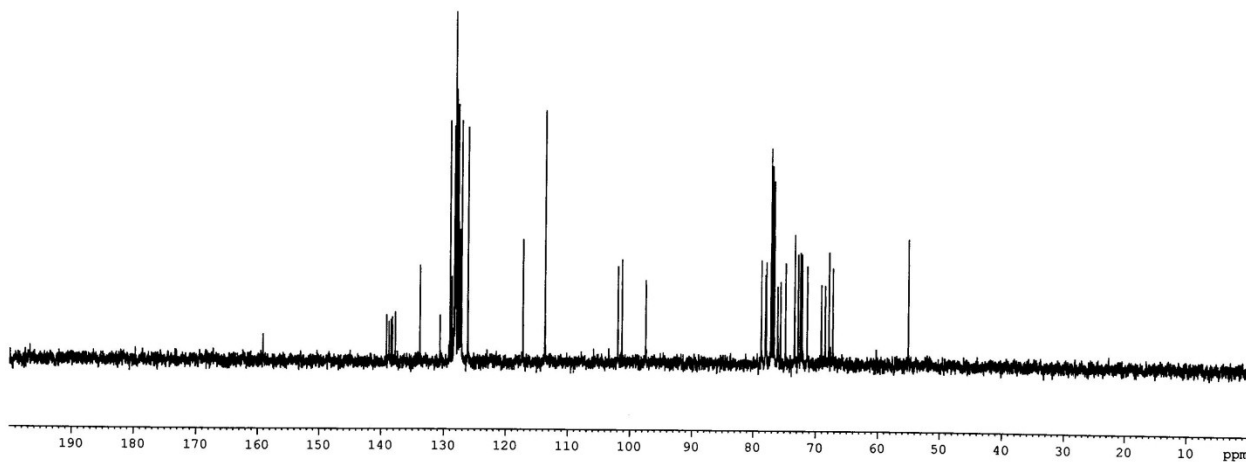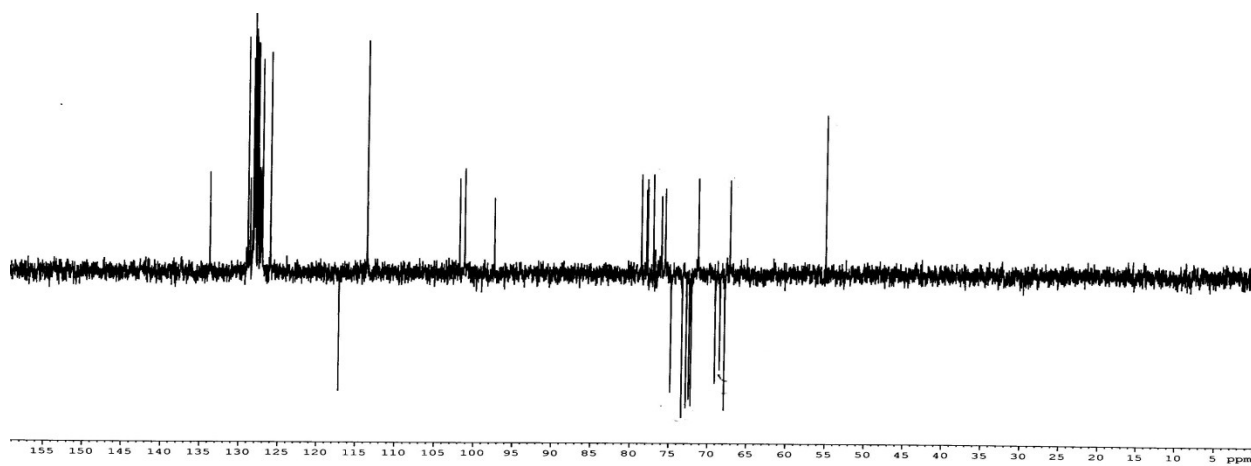

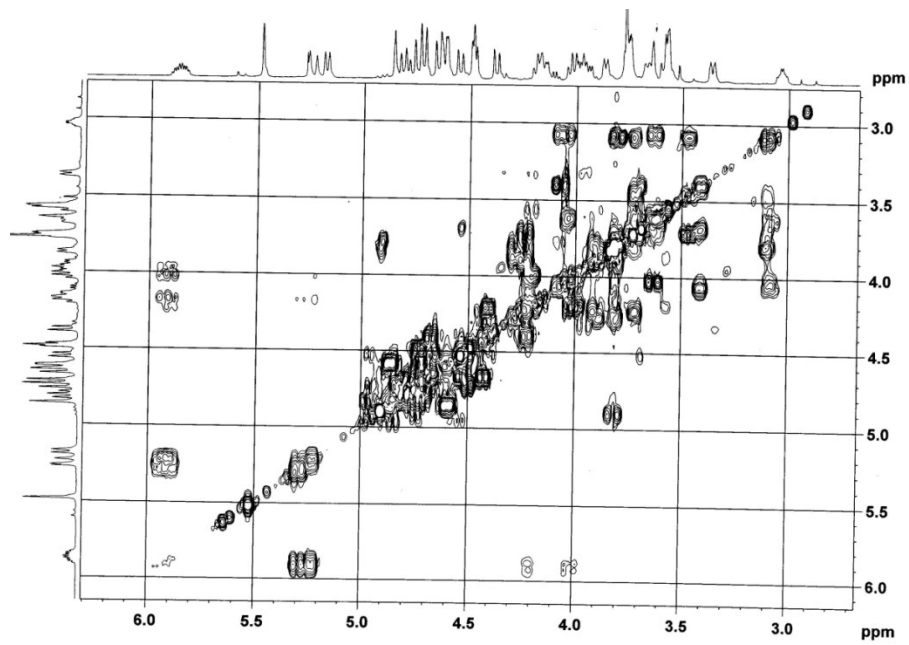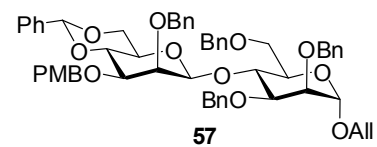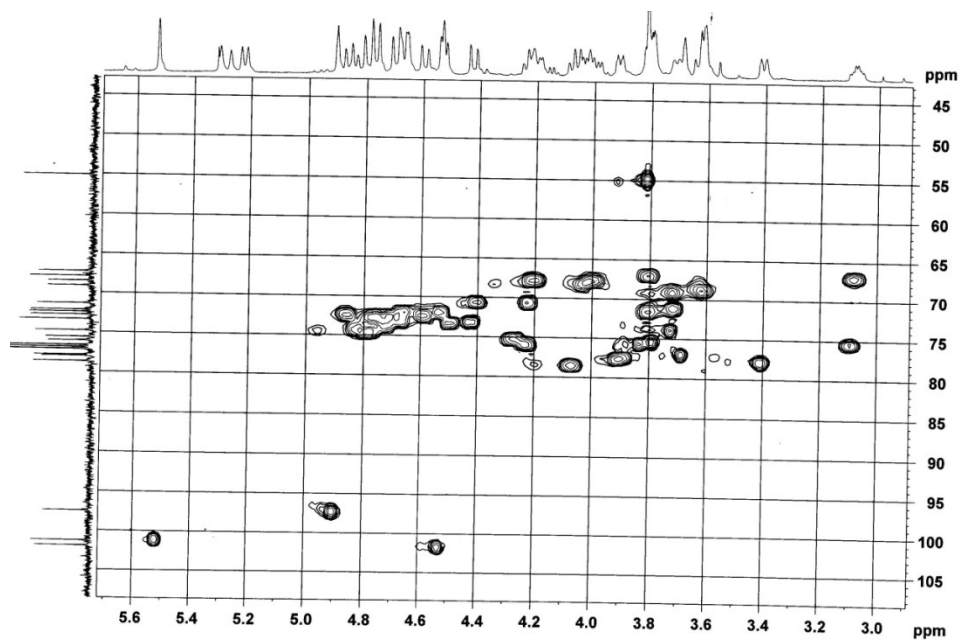

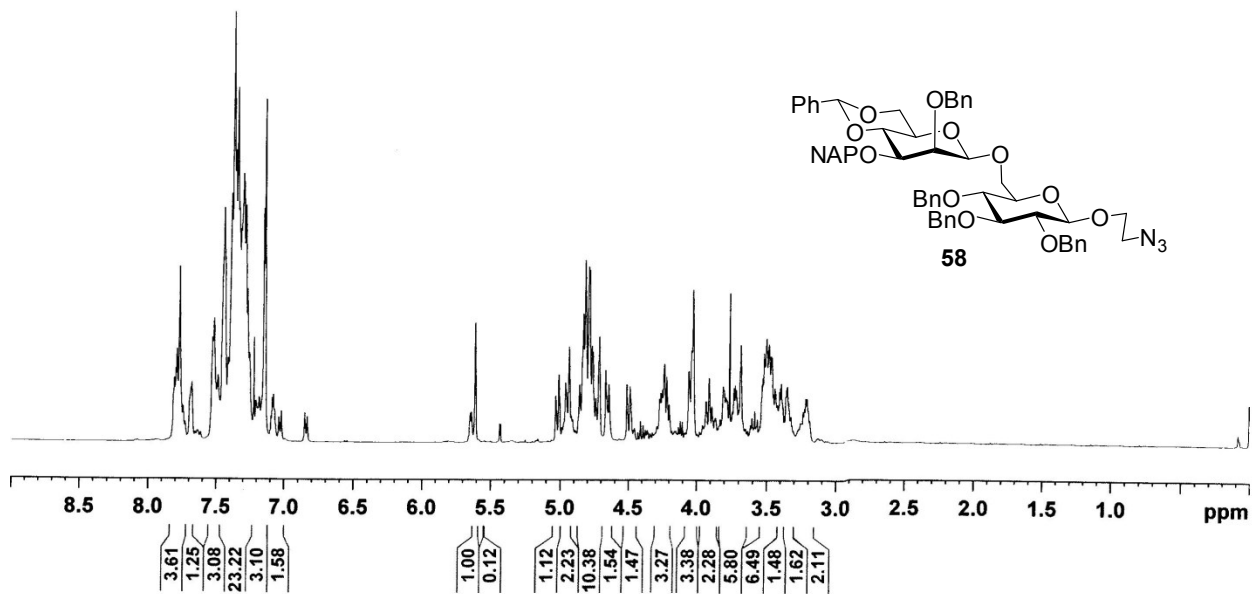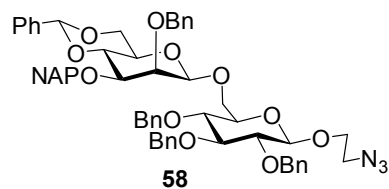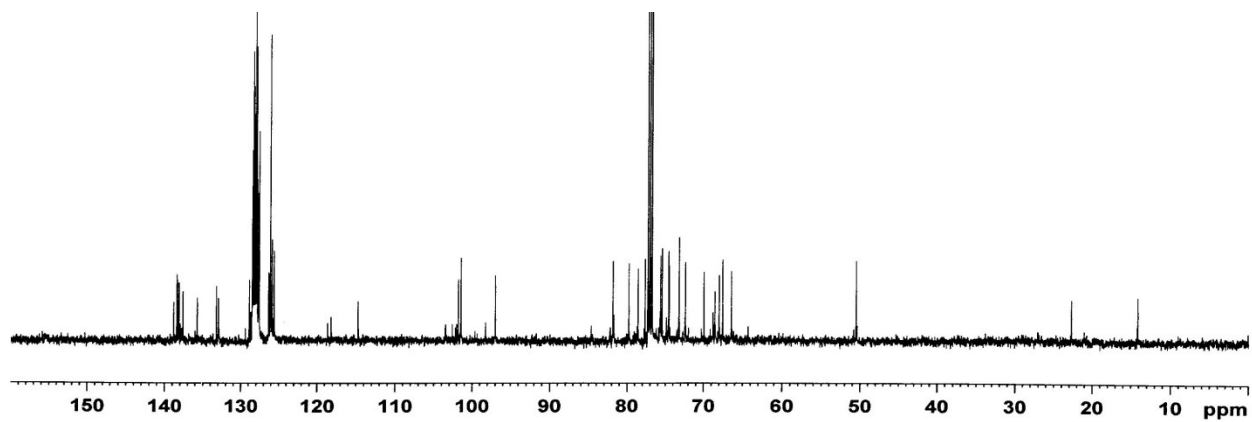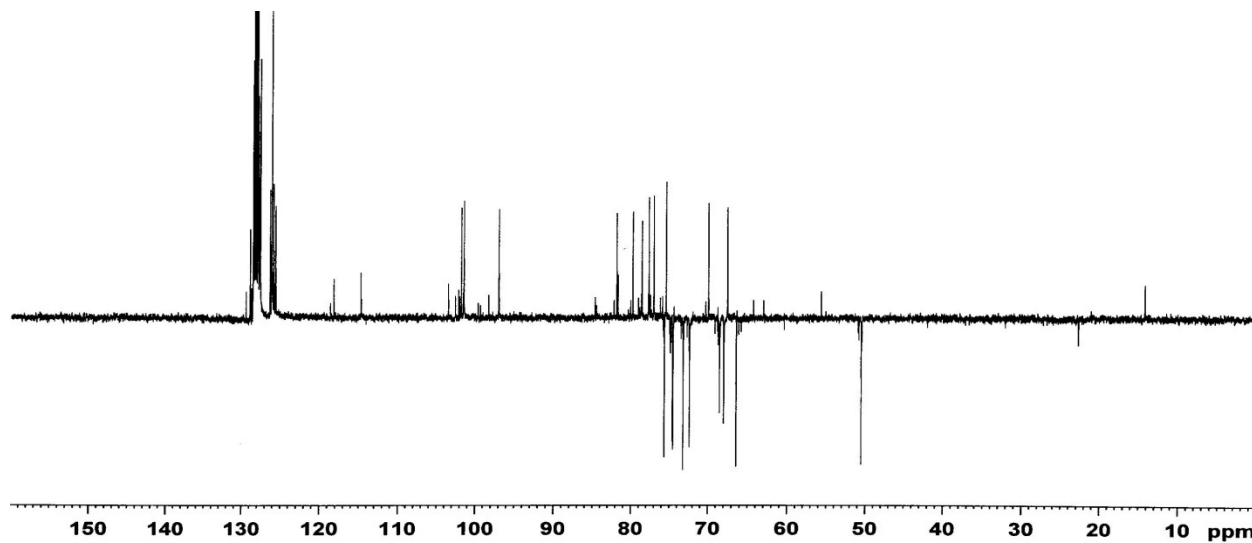

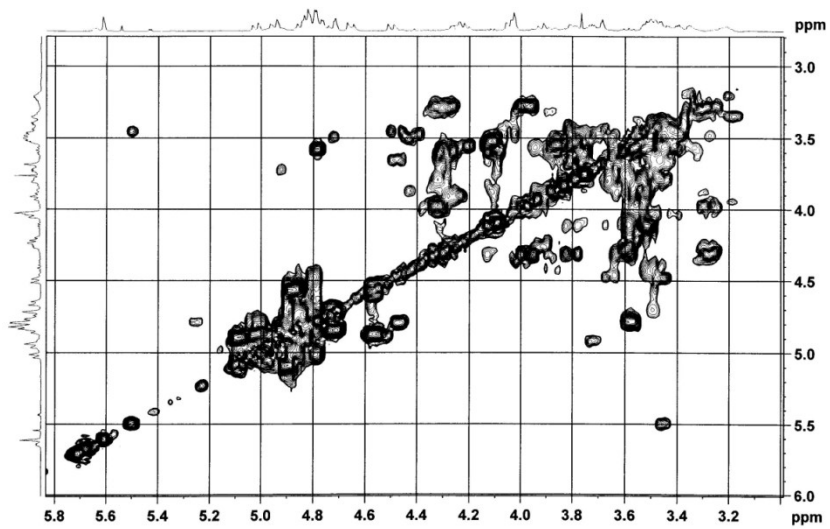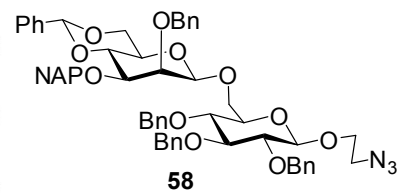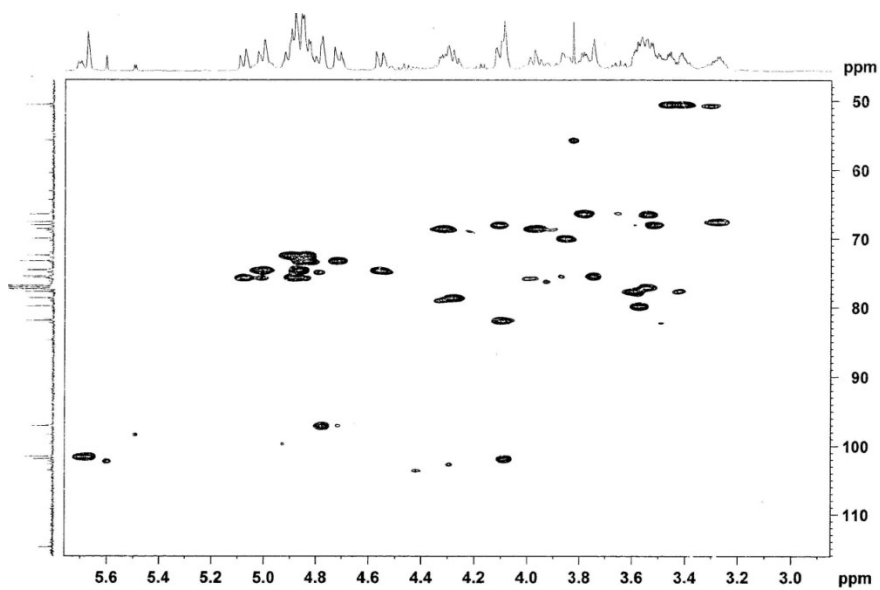



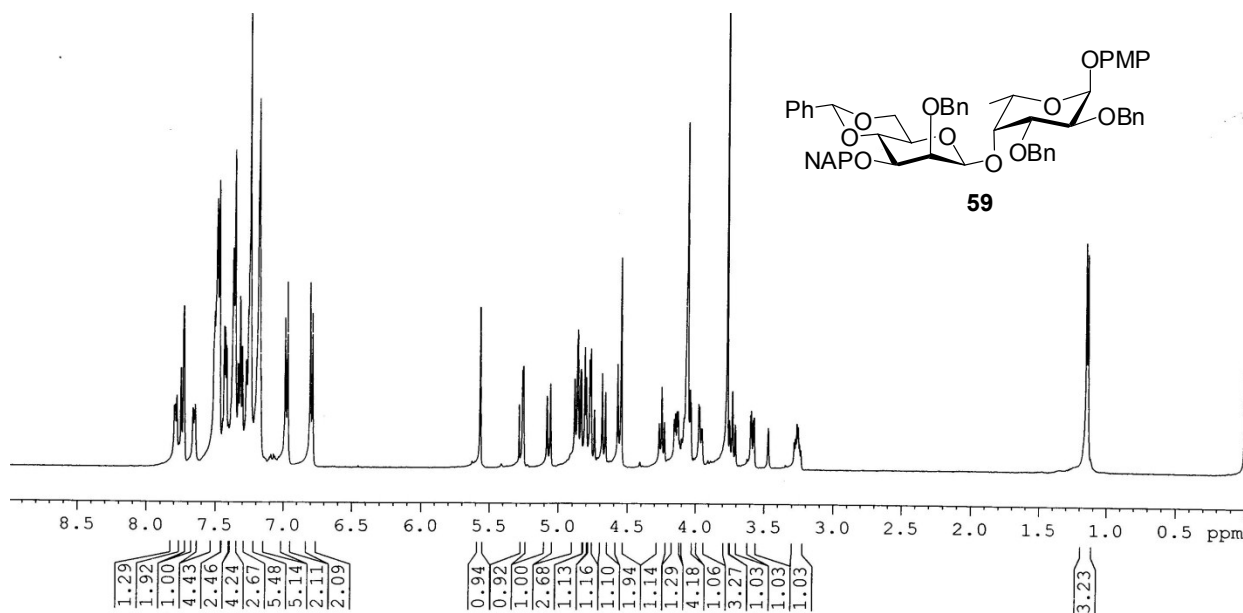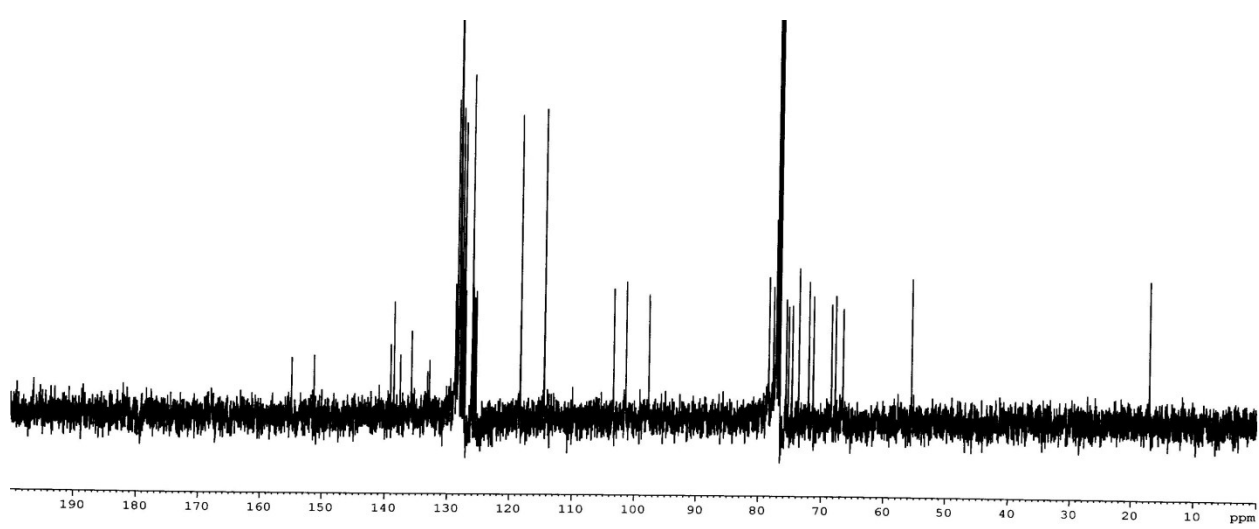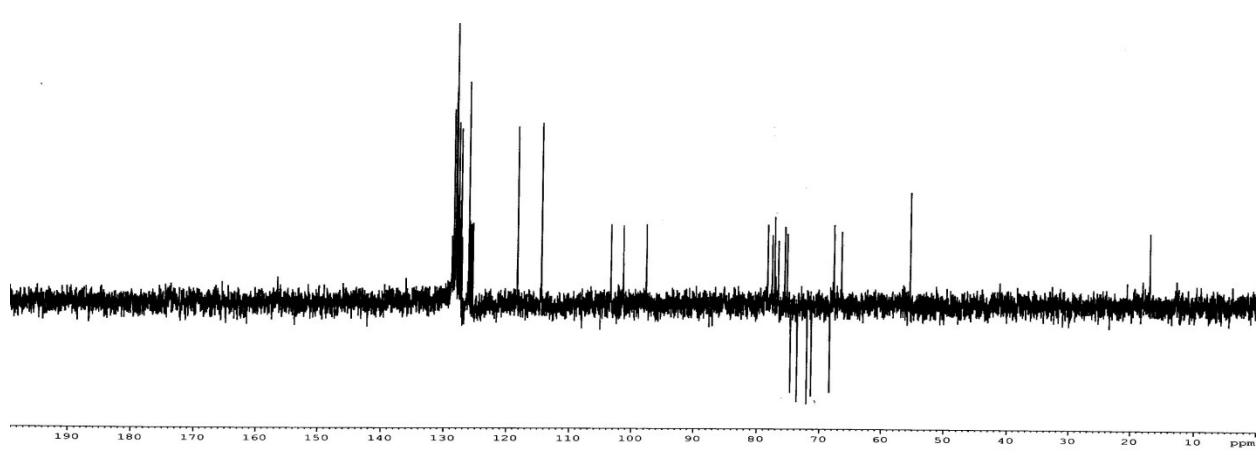

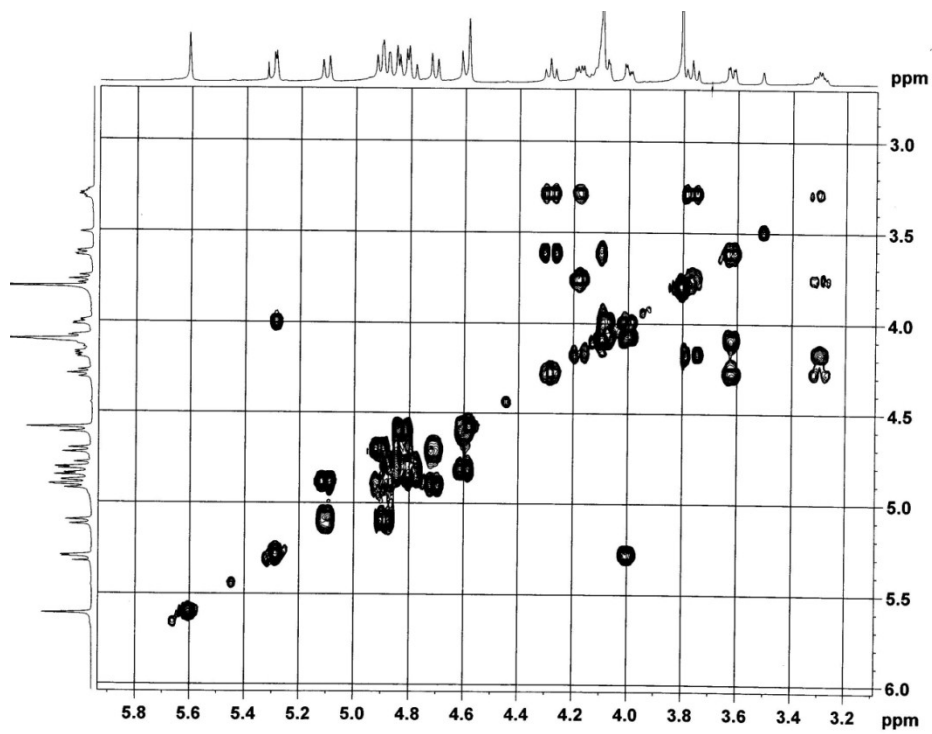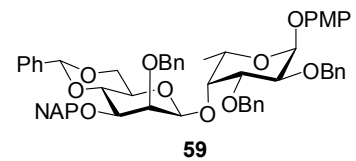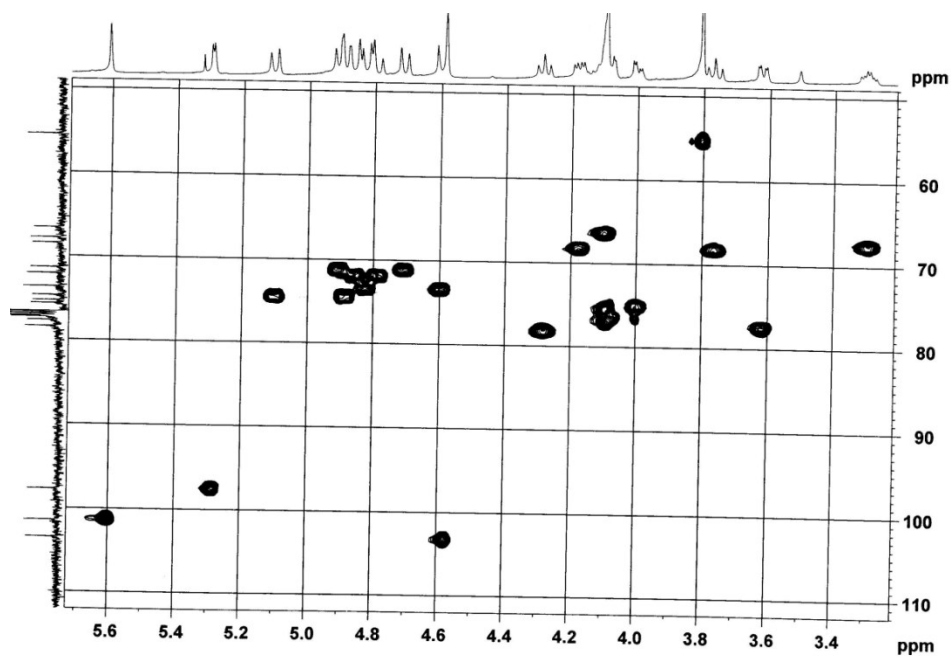

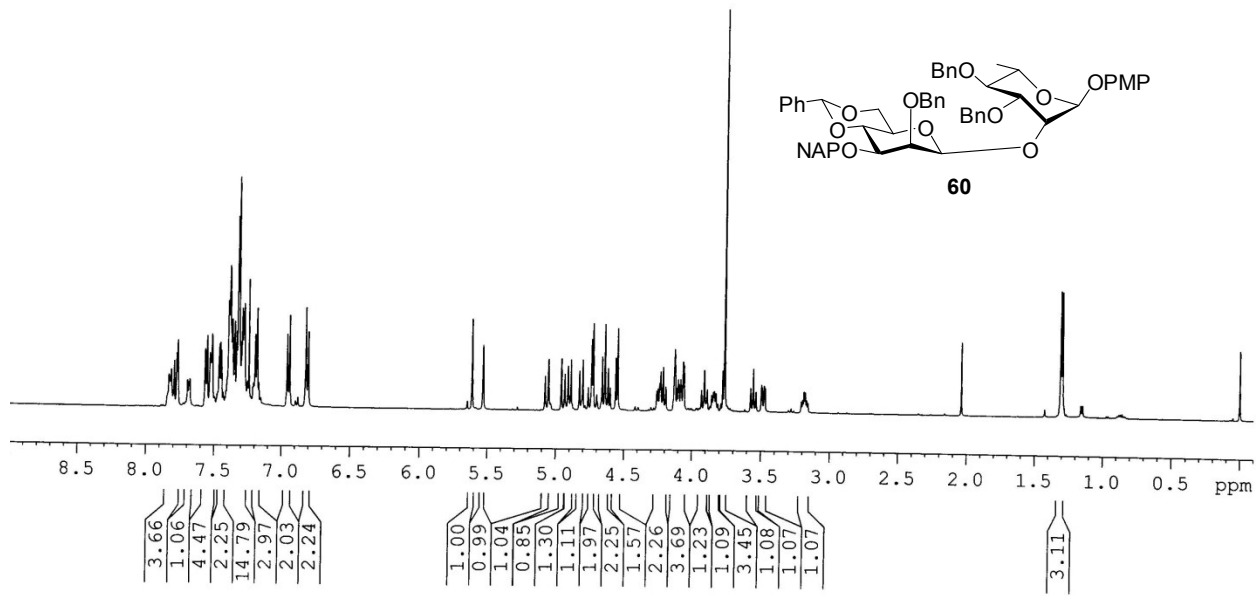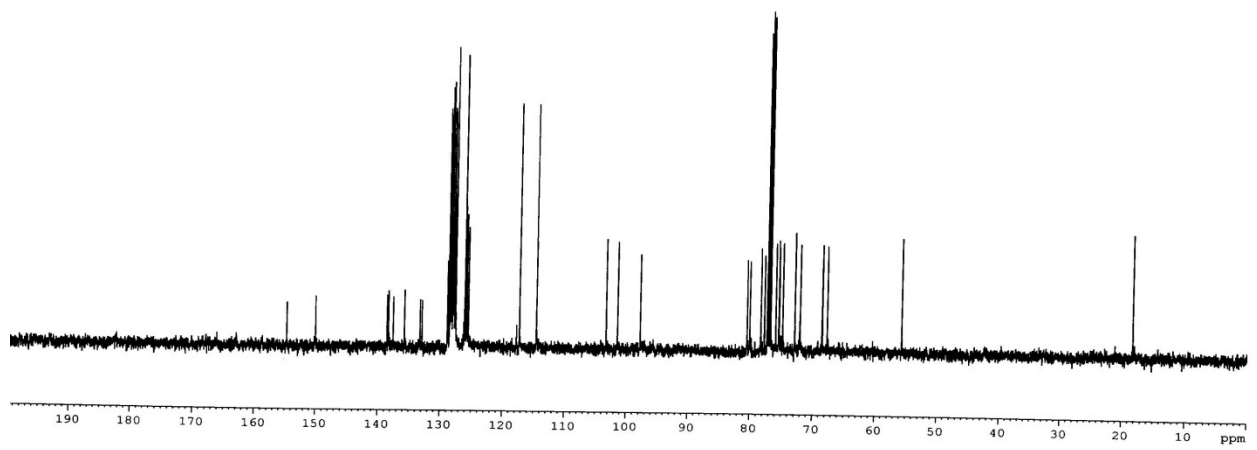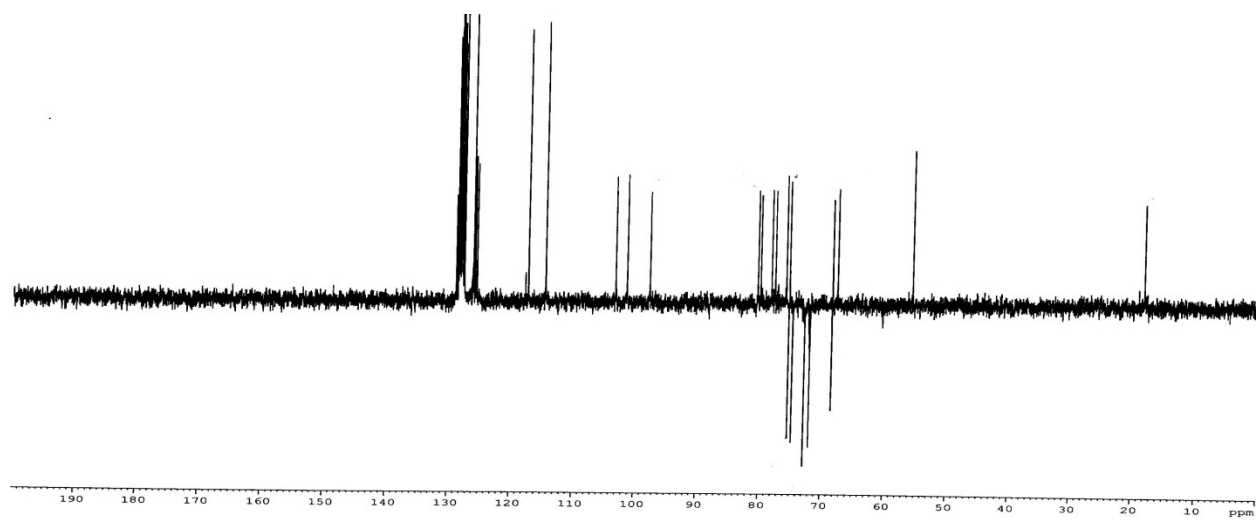

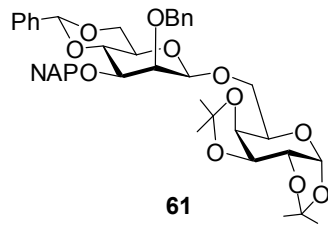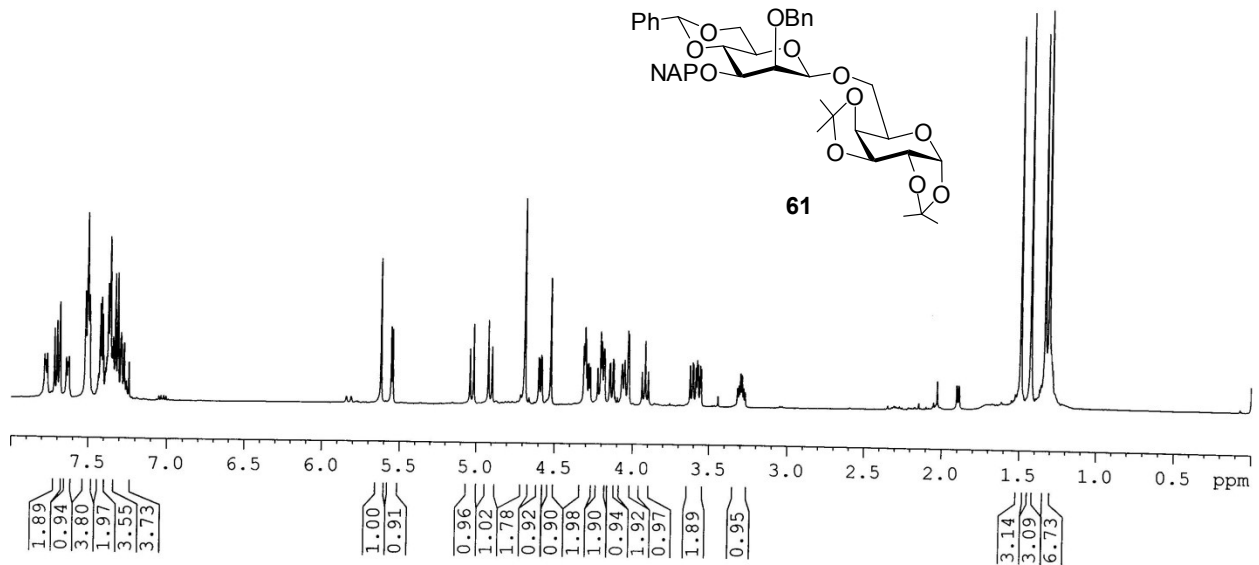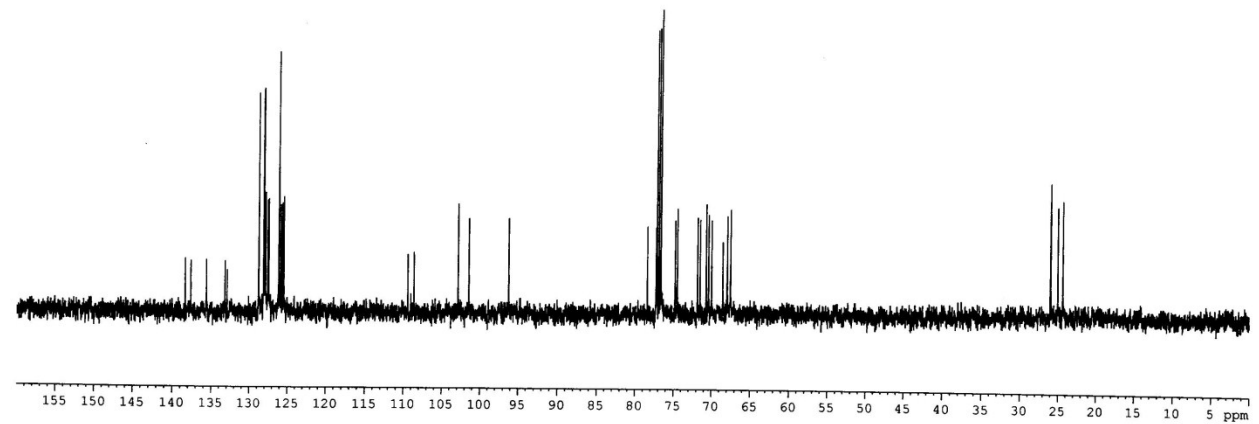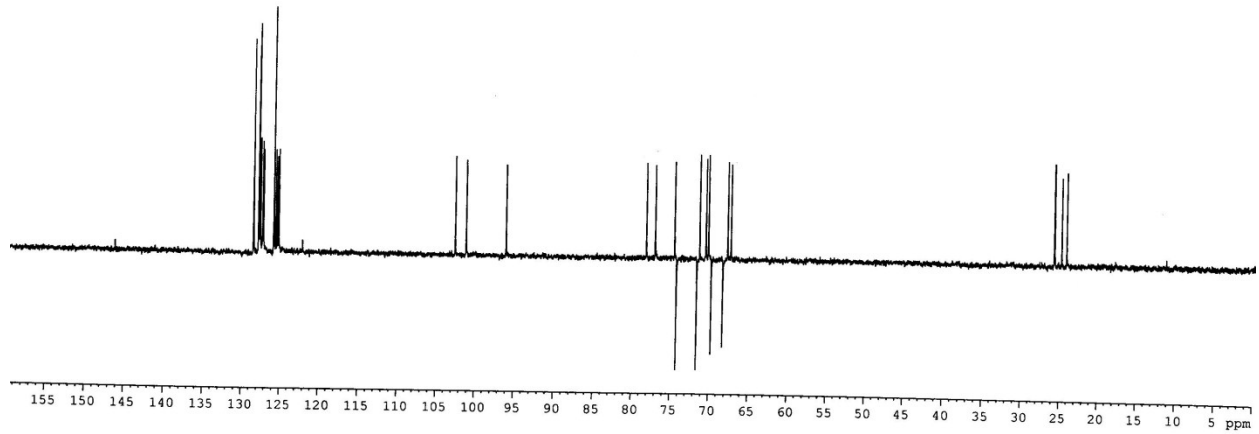

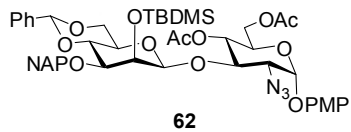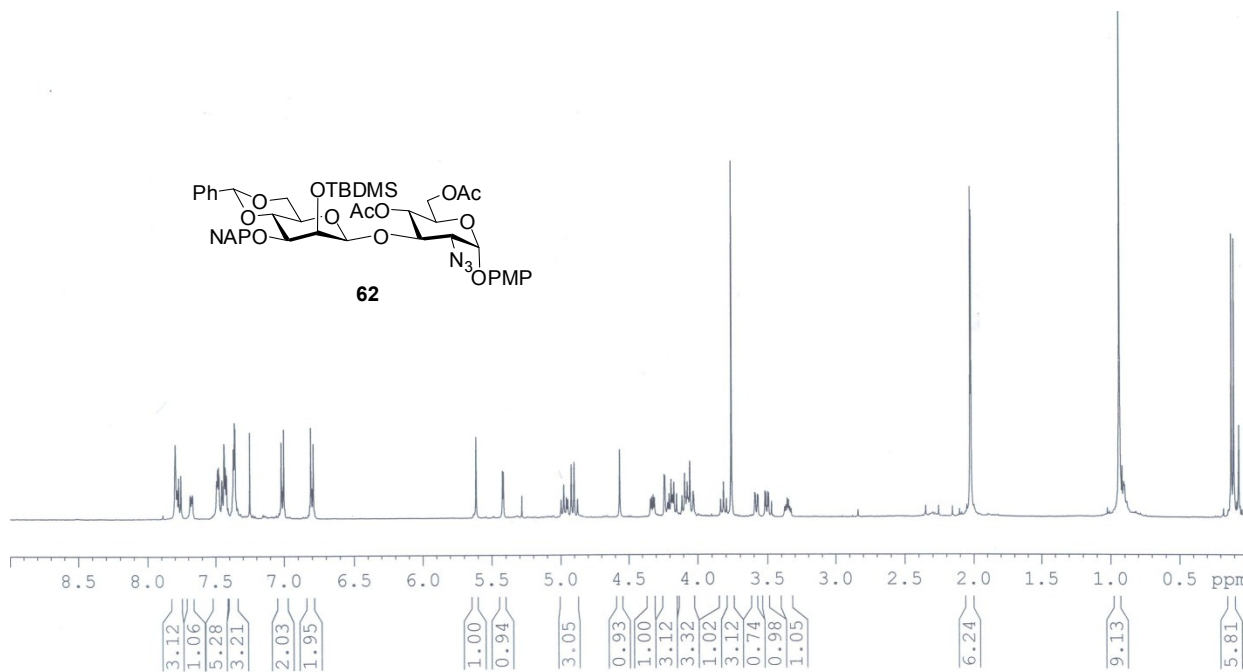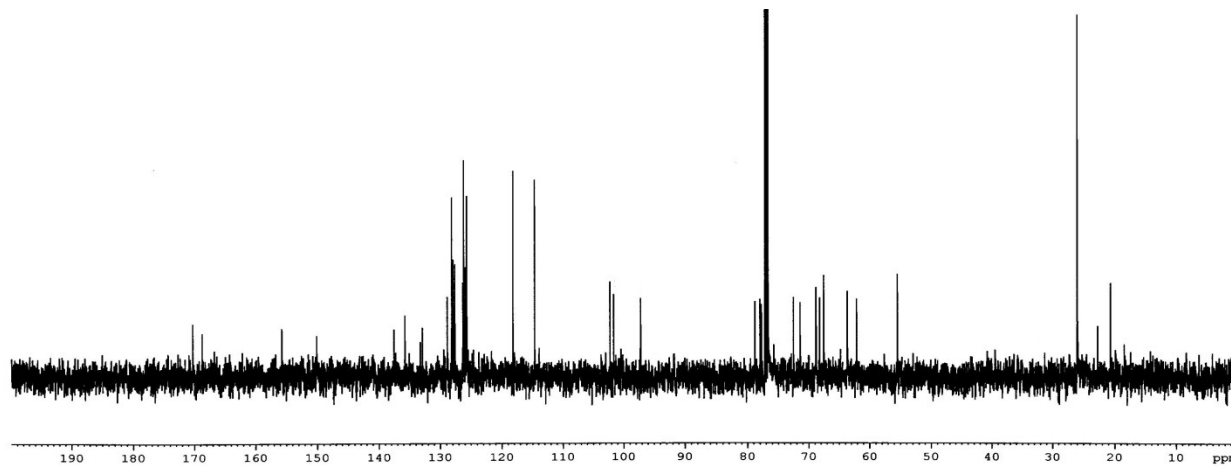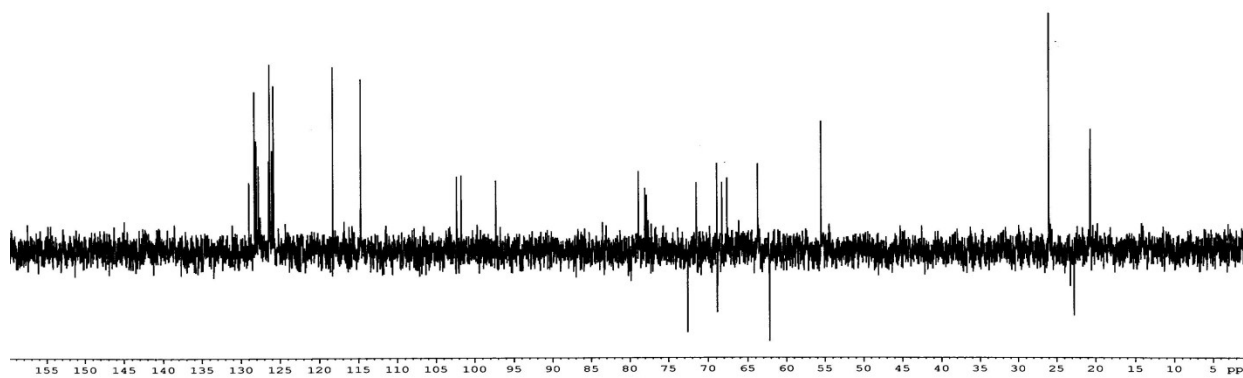

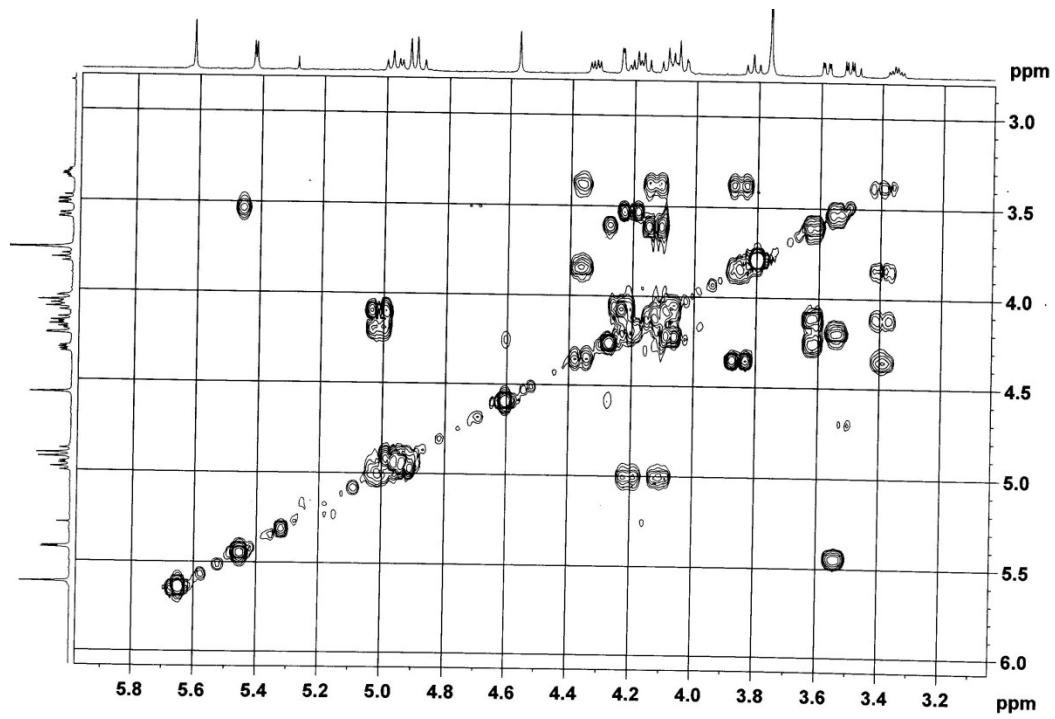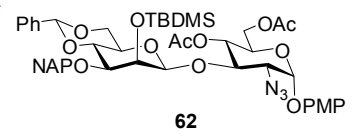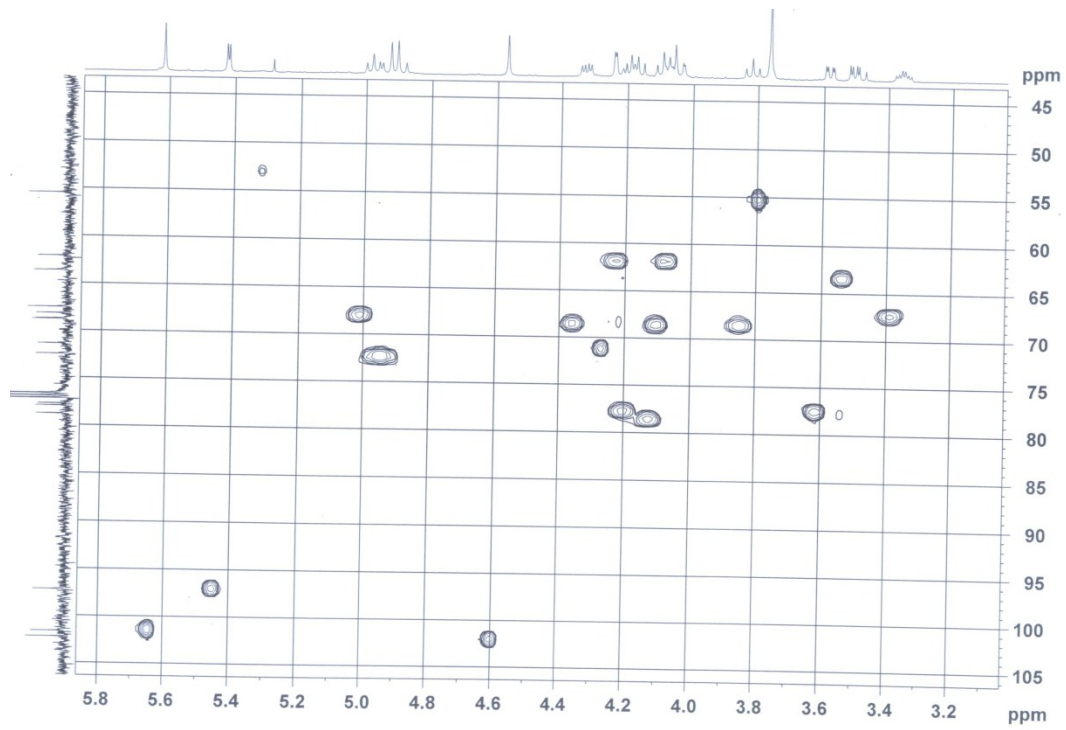



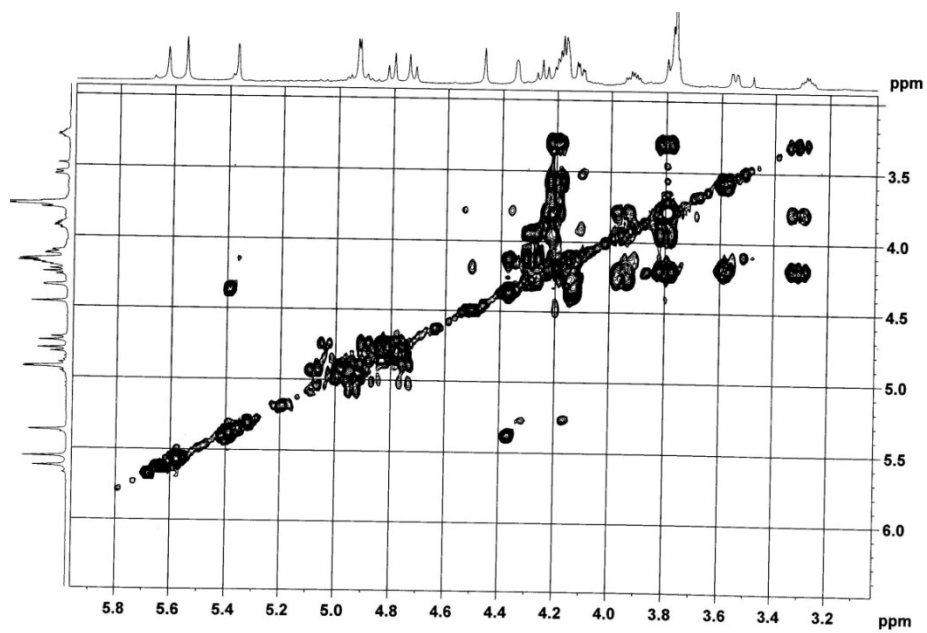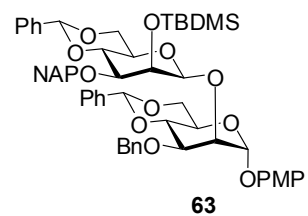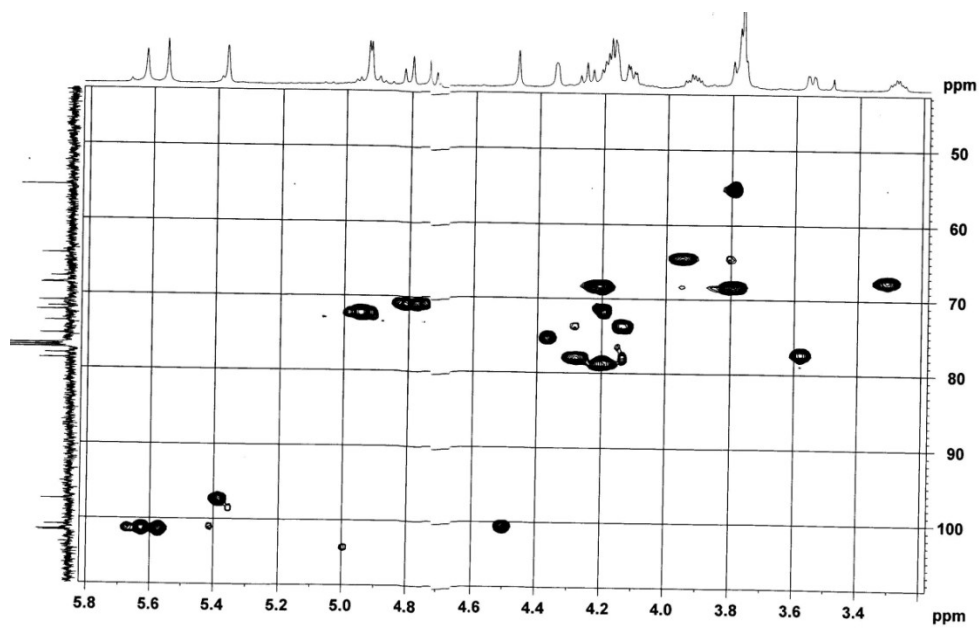



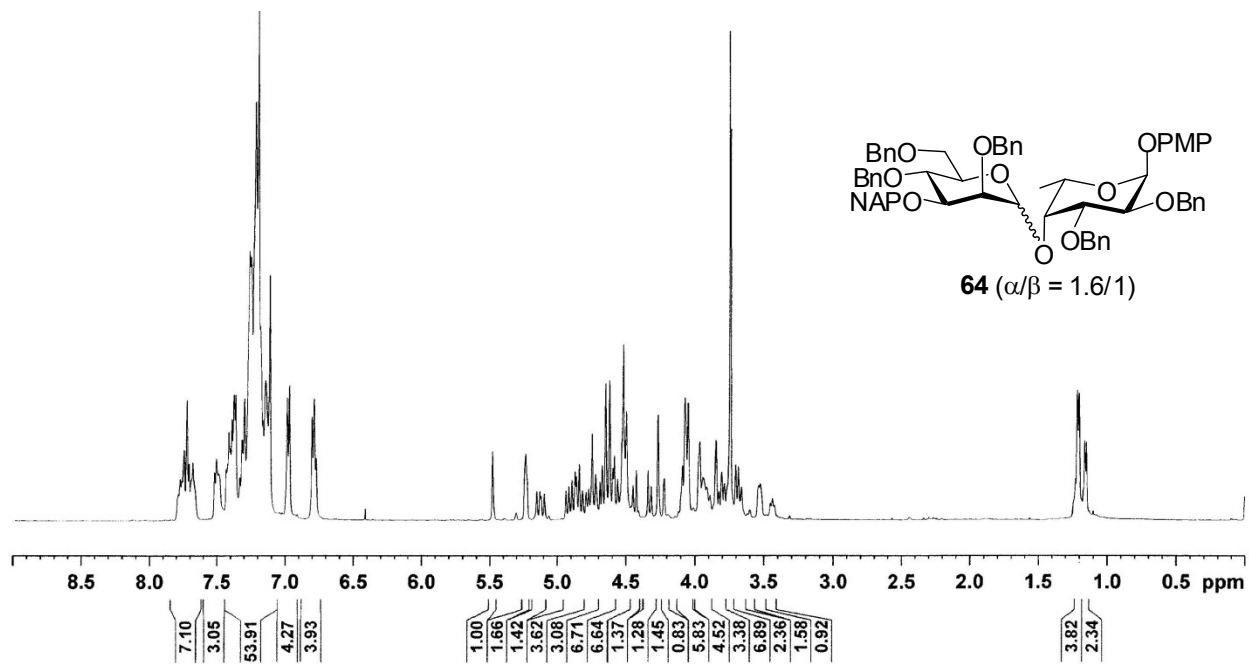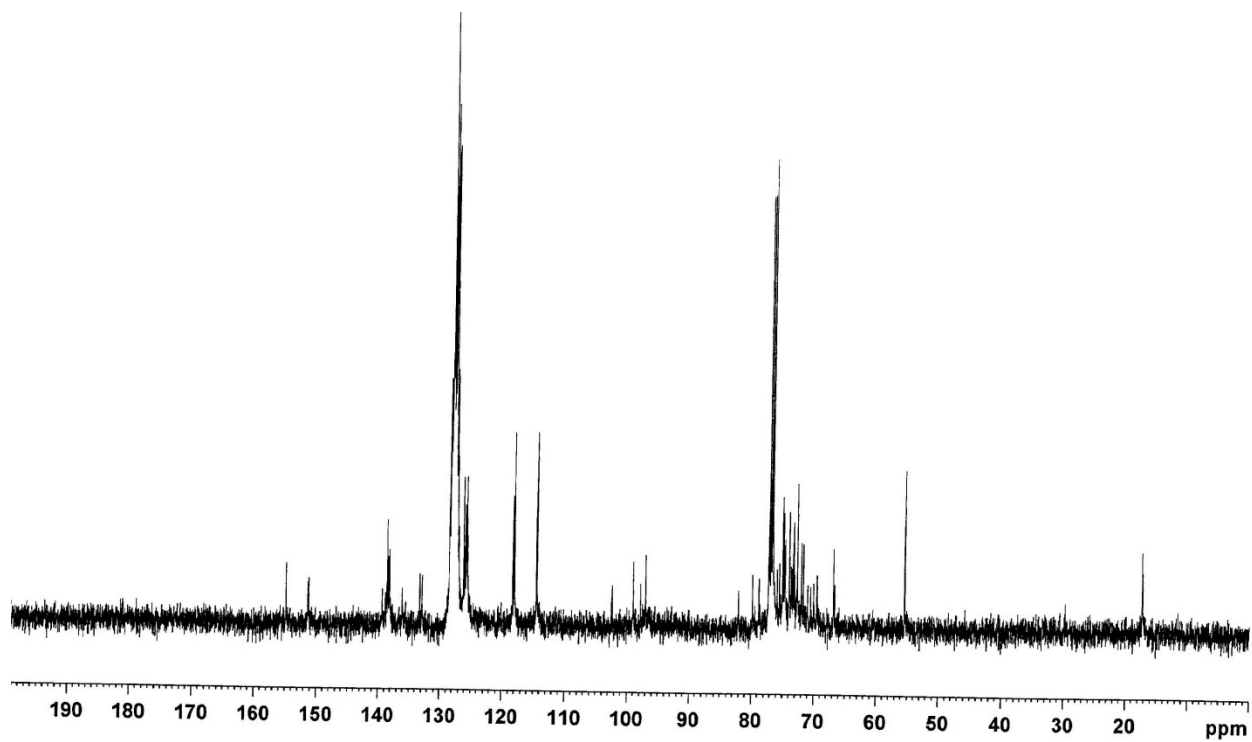

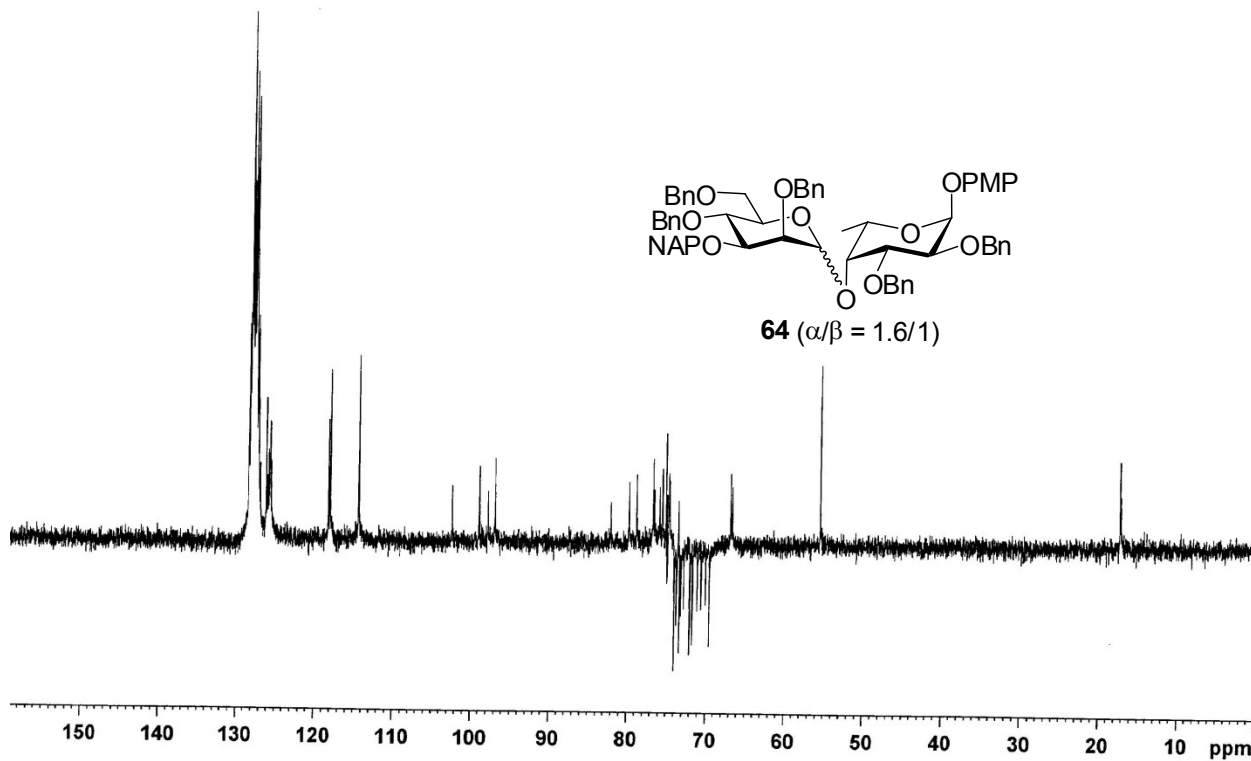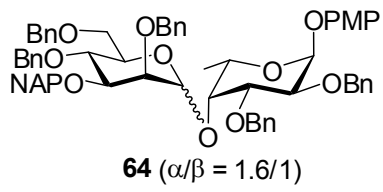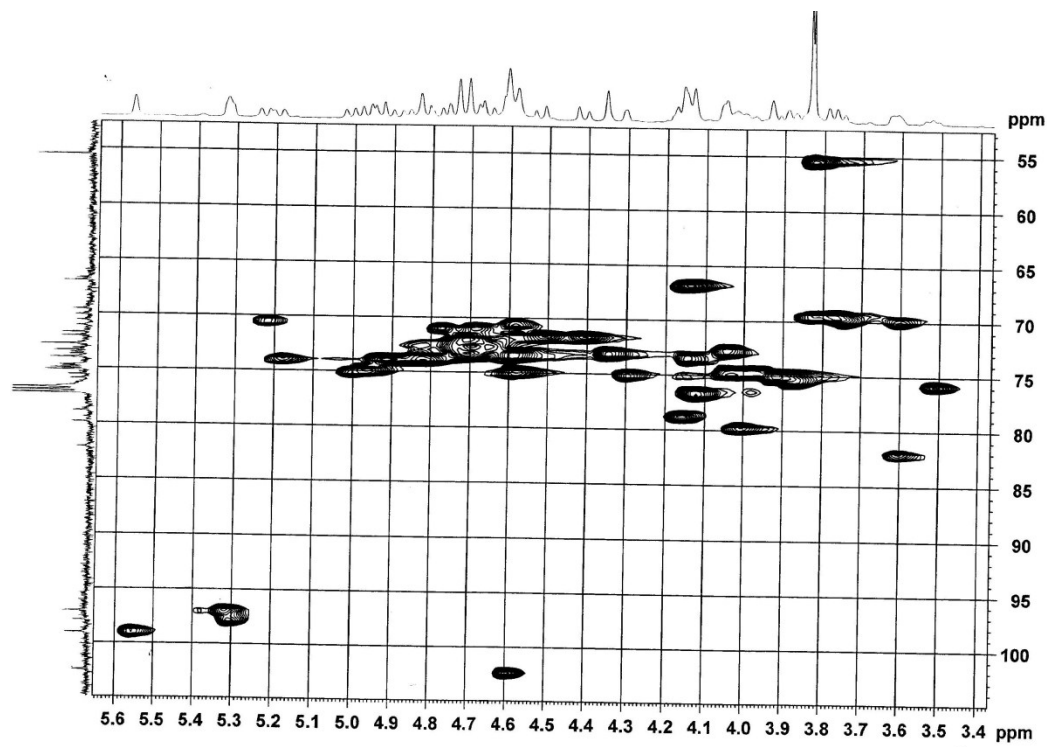

Supplement: c9ob00670b1.pdf [file c9ob00670b1.pdf]
